# Supplementary material for: Double insertion of transposable elements provides a substrate for the evolution of satellite DNA
Source: PubMed Central journal article supplement — Genome Res. 2018 May;28(5):714–25. doi: 10.1101/gr.231472.117 (PMC5932611; doi:10.1101/gr.231472.117), 2018-05

A

**Jockey**

B

TAACAGTGCGTTGATCAAATAATAAAAACATCATCGTAATCGCAAAAAGCTGTCAGCATACTCAACTTGTTCTAACGTACAGGCCAACATGATCTGTACTC

C

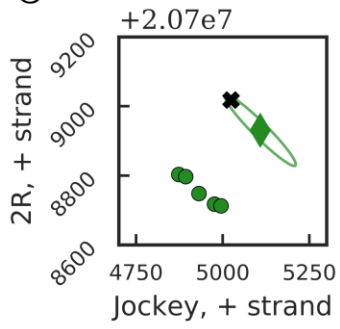

D

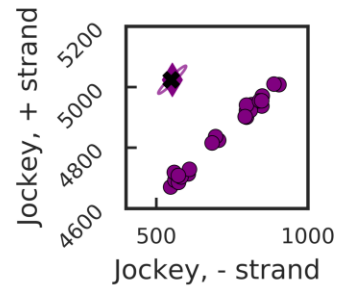

E

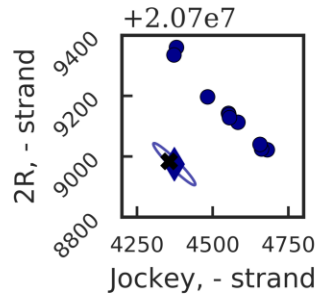

F

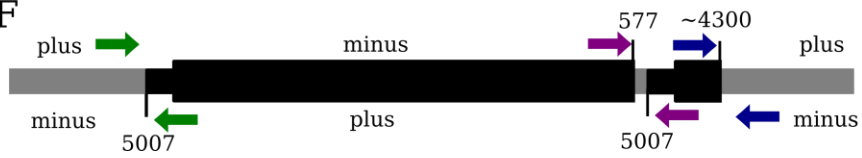

Supplement: supp_gr.231472.117_Supplemental_Fig_S6.pdf [file supp_gr.231472.117_Supplemental_Fig_S6.pdf]
