# Supplementary material for: Double insertion of transposable elements provides a substrate for the evolution of satellite DNA
Source: HighWire-hosted journal article supplement (doi:10.1101/gr.231472.117), 2018-03-27
Supplement: Supplemental_Figure_Legends.docx [file Supplemental_Figure_Legends.docx]

Supplemental Figure S1: Visualizing and approximating read pair distributions. A) A representative gap size distribution from sample N03. Dots represent the observed frequency of specific gap sizes, the red line is the kernel density estimate of the gap size distribution, and the orange line is the gap size distribution conditioned upon the read pairs spanning a junction. B) A schematic depicting a read pair spanning a junction (orange marker). The red arrows depict the forward (above the line) and reverse (below the line) reads. The distance between reads can be partitioned into two components: the distance from the forward read to the junction () and the distance from the reverse read to the junction (). C) The distribution of 1,000 read pairs spanning the same junction (black x) as a two-dimensional scatterplot, where the Y-axis corresponds to the position of the forward reads and X-axis the position of the reverse reads. The Manhattan distance between read pairs and the junction (i.e. ) follows the gap size distribution and thus points equidistant from the junction fall along 45-degree diagonals yielding diagonal read pair distributions. We estimate the location of the underlying junction as the average read pair coordinate (red square) offset by half the mean gap size along both the X- and Y- axes (orange dot depicts the estimate). There are two perpendicular components of variance in this distribution, one reflecting how the read pair is offset from the junction (V1) and the other reflecting the gap size (V2). D) A zoomed in view of the scatterplot in Fig 2C overlayed with the fitted Gaussian Mixture Model used to cluster the read pairs. Each dot reflects the 3’-end of a read pair. Dots with the same color belong to the same cluster. The ellipses indicate the location and shape of the component distributions in the fitted GMM. E) A depiction of how a scale parameter along an eigenvector (in this case V1) is determined to obtain a suitable Gaussian approximation of the read pair distribution so that the data can be clustered. Each dot is the performance of the EM algorithm given a scale parameter on a bootstrapped sample of read pair distributions from the training set. The blue trendline is the fitted Gaussian process regression between scale parameters and clustering performance, and represents the expected performance at a given parameter. The green dotted line indicates the performance cutoff, and the orange dotted line the parameter at which clustering performance is expected to drop below this cutoff.

Supplemental Figure S2: A) Number of clusters identified in artificial data by EM as a function of initial components specified when initialized by standard Forgy. We generated 25 artificial distributions from the N14 insert size distribution such that no distributions overlap and clustered using GMMs ranging from 2 to 500 components in size with the appropriate covariance for N14. While this initialization method does not constrain components to be at least distance *d* apart, it does require that each data point be explained by at least one component, and adds additional components if necessary, which is why the smallest cluster count is 14. Even after the number of components exceeds 200, the algorithm tends to recover 28 clusters. Using the distance-constrained Forgy initialization scheme identified 28 clusters in 996 of a 1,000 EM runs, and 29 in the remaining four. B) The artificial data clustered with a 500 component GMM (red in A); different clusters are denoted by color.

Supplemental Figure S3: Expected clustering performance for each library in the GDL: A) Each red line depicts the expected precision as a function of the distance between two junctions along the first eigenvector of the model covariance for each strain in the GDL. B) Expected precision as a function of the distance along the second eigenvector. C) The distributions of expected pairwise recall across the GDL for a given read count.

Supplemental Figure S4: Performance of fuzzy clustering to match junctions across strains. A) The relationship between read count and RMSD. B) The relationship between population frequency and RMSD. C) The relationship between read count and recall. D) The relationship between population frequency and recall. E) An example of how *R1* tandem junctions are clustered using this approach. Circles represent the estimated locations of junctions identified in particular strains and are colored to reflect how they are clustered. Diamonds indicate the estimated location of the true junction.

Supplemental Figure S5: Average tandem copy number (conditioned on a tandem being present) for A) LTR retrotransposon families, B) non-LTR retrotransposon families, and C) DNA transposon families. Head-to-tail tandems have junctions involving the first and last 200-nt of the consensus sequence. Tail-to-internal junctions have junctions between the last 200-nt of the consensus sequence and internal sequence; these are consistent with tandems involving 5’-truncated elements, though they can also be formed by nested insertions. All other tandem junctions are classified as internal-to-internal.

Supplemental Figure S6: Method for mapping tandem dimers. A) A schematic of a full-length *jockey* element; thick box represents the coding sequence. B) An example read containing the 3’-end of one *jockey* insertion (yellow) and the truncated 5’-end of a different *jockey* insertion (purple) separated by mappable sequence. The sequence in green is identical to positions 20,708,988–20,709,014 of 2R. The unlabeled sequence appears to reflect a few nucleotides of *jockey* sequence missing from the 3’ end of the consensus. C-E) Three types of junctions used to identify a tandem of *jockey* elements at position ~20,709,001 of 2R. C) Read pairs spanning the junction between the intact 3’-end of a *jockey* element and position ~20,709,001 of 2R. D) Read pairs spanning the intact 3’-end of one *jockey* element (position 5,007) and a different *jockey* element truncated at position 566. E) Read pairs spanning the junction between position ~20,709,001 of 2R and position ~4,300 of a 5’-truncated *jockey* element. In C-E, the solid diamond and unshaded ellipse reflect the point estimate of the junction coordinate based on read pairs and the 95% confidence region, respectively. The black X represents the expected junction with the motif in C and E, and in D the coordinate of the tandem junction identified in the reads. F) The inferred structure of the tandem dimer based on the three identified junctions. The strands of the reference sequence (gray) and *jockey* (black, relative to the consensus) are noted above and below the diagram. Representative reads are denoted with arrows on the corresponding strands. The three colored read pairs correspond to the three identified junctions: green (C), purple (D), blue (E).

Supplemental Figure S7: A) An alignment between the R1 consensus and a representative PacBio read containing tandem R1 elements. Examples of the two high-copy tandem junctions identified by ConTExt are denoted with i and ii, one with a small deletion near the tandem junction shifting the read pair distribution. B) The scatterplot of all junctions identified from all lines in the GDL between the forward and reverse strands of R1. In orange are the junctions which display copy number correlation with the array size. In grey are junctions which likely reflect concordant reads mislabeled as discordant.
