# Supplementary material for: Double insertion of transposable elements provides a substrate for the evolution of satellite DNA
Source: HighWire-hosted journal article supplement (doi:10.1101/gr.231472.117), 2018-03-27
Supplement: Supplemental_Table_Legends.docx [file Supplemental_Table_Legends.docx]

Supplemental Table S1: Summaries of expected clustering performance and library parameters relevant to clustering. For each library, columns present from left to right: the mean, the standard deviation, the 0.5% and 99.5% quantiles of the gap size distribution; the distance cutoff used to identify the euchromatic TE insertions from which clustering parameters are learned; the covariance parameters of the GMM used to cluster the reads; the parameters of the generalized logistic regression that summarize how precision decays along the first and second eigenvectors of the covariance matrix; and the average recall for read counts between 2 and 19.

Supplemental Table S2: Sheet 1: Head-to-tail tandems (i.e. direct tandems) detected between the long terminal repeats of LTR retrotransposons. Such tandem junctions cannot be the product of unequal exchange between LTRs, which would not produce tandem LTRs but rather tandem internal sequence separated by a single shared LTR (see Fig 1A). The table is restricted to LTRs longer than 400-nt; potential tandems between LTRs shorter than this length are excluded, as we filtered out tandem junctions with coordinates within 400-nt of each other, believing they may reflect concordant read pairs (see Methods, “Categorizing tandem junctions”). The columns indicate the TE family, the LTR length, and the proportion of samples that contain head-to-tail tandems. Sheet 2: Head-to-head and tail-to-tail tandems for all TE families (i.e. inverted tandems). The columns indicate the TE family, whether it is a head-to-head (H) or tail-to-tail (T) tandem, and the population frequency. We have excluded tandems that clearly reflect nested insertions.

Supplemental Table S3: The locations of mapped dimers. The columns are divided into two general categories: 1) information about the insertion location and 2) information about the tandem junction. The columns regarding insert location (from left to right) indicate the repeat family, chromosome, strand, estimated position (the average of the two junctions), the sequence coordinates of the first junction on the reference chromosome and in the repeat, the sequence coordinates of the second junction on the reference chromosome and in the repeat, the gene name of the nearest transcription start site (TSS), the distance to the nearest TSS, the mapped location of the motif present in the tandem junction, and whether it is located in the pericentric heterochromatin as defined by (Riddle et al., 2011). The columns regarding the tandem junction indicate (from left to right) the number of reads supporting the tandem junction, the identified motif, the junction coordinates identified within the reads on the minus and plus strands of the repeat consensus, and the junction coordinates inferred from read pair alignments on the minus and plus strands of the consensus.

Supplemental Table S4: Clustered junctions involving the *R1* and *Bari1* elements (anchor) and any other sequence (target). The columns of the tables identify the average sequence coordinates of junctions in each cluster on the anchor and target sequences, the population frequency and average copy number of each cluster, whether the cluster is significantly correlated with the head-to-tail tandem junction of the corresponding repeat (i.e. the *R1* or *Bari1* array), the Benjamini-Hochberg corrected q-value of the correlation, and the corresponding correlation coefficient.

Supplemental File 1: The index of repeat consensus sequences to which we aligned the data.

Supplemental File 2: The ConTExt scripts as found in the Publication-Version branch of https://github.com/LaptopBiologist/ConTExt.
