# Supplementary material for: Double insertion of transposable elements provides a substrate for the evolution of satellite DNA
Source: HighWire-hosted journal article supplement (doi:10.1101/gr.231472.117), 2018-03-27
Supplement: Supplemental_Table_S1.xlsx [file Supplemental_Table_S1.xlsx]

## Sheet: sample_summary.tsv
Sample	Gap Size Distributions				Agglomerative Clustering	Clustering Parameters		Precision along eigenvector 1							Precision along eigenvector 2							Recall at read count
Sample Name	Mean Gap Size	Std Dev Gap Size	Gap Q0.5	Gap Q95.5	Distance Cutoff	Scale 1	Scale 2	A1	B1	Q1	M1	v1	Exp-phase	Prec>=.99	A2	B2	Q2	M2	v2	Exp-phase2	Prec>=.99 on Scale 2	2	3	4	5	6	7	8	9	10	11	12	13	14	15	16	17	18	19
B04	336.387	26.8699	177	392	282.01	190.1	17.9	0.484298	0.016006	6.45516	257.25	0.88297	298.046	630.482	0.473958	0.152269	0.0027943	16.5384	0.000255935	25.5457	58.2874	0.805	0.958889	0.955	0.9704	0.973056	0.98449	0.987656	0.98963	0.9934	0.993554	0.996319	0.988166	0.993265	0.996356	0.994805	0.99128	0.998426	0.996177
B05	345.167	28.1904	-12	401	295	195.1	20.1	0.487179	0.0138124	0.0178222	618.302	0.526418	286.277	658.83	0.487179	0.17137	0.000816461	32.0309	0.000388047	30.3015	59.391	0.8275	0.948889	0.990625	0.9744	0.983333	0.989388	0.993594	0.989877	0.9939	0.99124	0.994861	0.990414	0.993673	0.997511	0.997656	0.999446	0.999475	0.998504
B10	344.021	27.0237	109	399	291	184.5	19.4	0.482639	0.0153293	3.16615	305.037	1.01813	289.266	637.869	0.487179	0.175486	0.00240237	29.3911	0.000812132	29.6362	58.1025	0.83	0.931111	0.949375	0.954	0.966667	0.982041	0.988594	0.993086	0.9872	0.991074	0.994444	0.993077	0.996122	0.995556	0.997656	0.997093	0.9975	0.998504
B11	338.897	28.2501	67	396	288	184	22.8	0.4858	0.014742	1.56211	327.619	0.797266	284.784	639.839	0.486486	0.190915	1.08719	36.3061	0.33613	36.205	63.2442	0.8125	0.962222	0.9675	0.9736	0.98	0.988163	0.989688	0.986914	0.9933	0.998347	0.997014	0.99858	0.998673	0.995022	0.999414	0.997924	1	0.997507
B12	339.54	26.0668	278	395	290	181.6	22.8	0.487179	0.0145675	0.711736	373.174	0.788867	277.419	638.794	0.487179	0.215657	0.00246519	35.0866	0.000646204	36.205	59.5779	0.81	0.946667	0.9825	0.9808	0.983333	0.986531	0.983281	0.98963	0.9975	0.997686	0.995417	1	1	1	0.997266	1	1	1
B14	332.964	28.3061	59	390	283	191.9	20.3	0.481038	0.0155149	9.7559	211.47	0.835644	285.439	624.88	0.487179	0.150395	0.00119732	29.6853	0.000392474	30.195	63.2462	0.835	0.944444	0.963125	0.9792	0.983056	0.987755	0.987812	0.991605	0.9982	0.996364	0.999236	0.996568	0.994949	0.998756	0.998477	0.998408	1	0.999501
B23	344.575	27.1746	22	399	290	189	23.1	0.485795	0.0156918	4.66703	297.58	1.0866	300.121	642.03	0.487179	0.265436	0.424796	42.0071	0.312946	38.5387	58.0402	0.8425	0.973333	0.968125	0.996	0.980278	0.985714	0.99125	0.997531	0.9976	0.991488	1	0.99787	0.999337	1	1	0.996125	0.9975	1
B28	353.305	26.8791	234	409	302	191.9	21.6	0.484298	0.0148493	4.57027	288.885	0.958957	300.868	659.596	0.487179	0.220465	0.317528	40.4832	0.334434	34.7337	58.1789	0.875	0.972222	0.975625	0.9856	0.9775	0.985306	0.993281	0.987531	0.9991	0.998017	0.997708	0.998698	0.999337	0.992533	1	1	0.994722	0.999058
B38	344.908	30.2357	-3	402	296	190.6	27.9	0.484298	0.0153659	10.9682	228.857	0.984459	294.999	643.634	0.487179	0.195756	0.262359	48.0498	0.15974	44.8643	70.6613	0.835	0.975556	0.975625	0.9844	0.993611	0.991837	0.990469	0.997284	0.9924	0.995207	0.991875	0.99716	0.994184	0.997156	0.998828	0.995294	0.997099	1
B42	347.626	27.735	24	403	293	206.4	24.4	0.485795	0.0156572	1.44728	349.854	0.758859	307.007	643.055	0.487179	0.217272	0.00155996	37.3365	0.000294048	40.2171	63.2683	0.86	0.984444	0.988125	0.9928	0.997778	0.997959	0.997656	1	1	1	0.999236	0.997515	1	1	1	1	1	0.999501
B43	348.94	26.3019	271	404	295.01	198.1	19.9	0.479393	0.0127813	1.68563	291.608	0.582716	278.734	684.888	0.487179	0.176866	0.00144359	27.555	0.00034204	30	58	0.8425	0.971111	0.9675	0.9876	0.9875	0.988163	0.992188	0.994568	0.9934	0.997686	0.998472	1	0.998112	0.997778	0.999414	0.997785	0.998951	0.999501
B51	324.83	28.2142	6	380	277	182.9	25.6	0.487179	0.0167856	0.628721	388.181	0.916606	286.758	599.25	0.487179	0.260541	1.65152	44.6261	0.598107	43.2241	63.807	0.87	0.972222	0.983125	0.992	0.991111	0.997959	0.995156	0.999012	0.9979	0.999174	0.999236	0.992663	1	0.998844	1	0.999446	1	0.998338
B52	337.194	27.819	29	392	284	189.6	22.1	0.487179	0.0145166	0.349626	424.715	0.773065	282.018	640.257	0.487179	0.214579	0.00165112	33.8455	0.000381338	35.5377	59.0814	0.8675	0.977778	0.970625	0.9744	0.991111	0.993061	0.992188	0.990864	0.9919	0.998347	0.999236	0.99787	1	1	0.998477	1	0.998951	1
B54	343.665	26.5651	238	399	292.01	192.6	20	0.487179	0.0162844	0.573207	425.365	1.01433	305.837	631.031	0.487179	0.217277	0.188525	34.4592	0.126916	31.3568	54.6734	0.845	0.962222	0.975	0.9856	0.983889	0.987755	0.994844	0.998025	0.9925	0.996694	0.998472	0.99716	0.999337	0.999378	0.998242	0.997855	0.997901	0.998006
B59	322.302	27.6303	121	373	275	185.6	14.8	0.482639	0.016412	2.63138	299.519	0.886713	283.53	608.096	0.485795	0.16551	0.0017028	15.6452	0.000270648	20.5266	50.5729	0.8475	0.951111	0.955625	0.9584	0.967778	0.963061	0.972812	0.980247	0.9791	0.987273	0.988611	0.991006	0.98699	0.992533	0.986914	0.992803	0.993765	0.990249
I01	332.445	25.5974	277	387	278	183.8	22.5	0.484298	0.0164459	2.52134	307.716	0.929775	284.474	609.588	0.487179	0.224908	0.00342774	35.0611	0.000869058	36.6332	58.794	0.855	0.973333	0.97	0.9784	0.986944	0.996327	0.995781	0.994568	0.9949	0.99438	0.997778	1	0.999337	1	1	0.996263	0.997623	1
I02	342.773	25.1768	291	399	292	184.2	21.1	0.480769	0.0156704	3.22779	304.808	1.01525	288.796	629.427	0.483333	0.207862	0.0419254	15.3584	0.000359355	33.0814	57.2563	0.8375	0.962222	0.946875	0.9736	0.983056	0.994286	0.987344	0.992099	0.9898	0.998347	0.998472	0.992663	0.99648	0.998756	0.999414	0.99737	0.999475	1
I03	333.734	28.3858	101	391	283	183.4	21	0.481038	0.0185397	8.72443	283.519	1.33604	305.974	597.202	0.487179	0.147486	0.000564425	30.4886	0.000187232	30.8141	65.005	0.8325	0.946667	0.9575	0.9556	0.978333	0.976327	0.975781	0.991605	0.9883	0.993223	0.994444	0.993846	0.995816	0.997511	0.99832	0.998962	0.997747	0.997562
I04	342.724	27.7022	135	400	287	185.2	19.6	0.485795	0.0158438	5.9721	283.259	1.11626	301.532	636.567	0.4858	0.143517	0.00251878	23.0388	0.000445118	27.9719	62.6412	0.8	0.951111	0.974375	0.9656	0.975833	0.969592	0.987812	0.993827	0.9964	0.995372	0.986458	0.996568	0.993367	0.996267	0.998242	0.99564	0.998086	1
I06	336.076	25.1249	267	385	286	192	14.3	0.487179	0.0136138	0.260969	413.659	0.500356	277.869	656.08	0.486486	0.173238	0.00110759	15.4593	0.000183977	20.1206	48.5769	0.86	0.953333	0.965	0.9676	0.968611	0.973673	0.980625	0.985185	0.9848	0.98562	0.989236	0.99503	0.993571	0.99	0.98918	0.991142	0.996852	0.997673
I07	327.838	26.6684	97	382	282	183.9	21	0.487179	0.0181039	0.91952	385.574	1.07419	299.415	595.134	0.487179	0.177937	0.00166223	30.836	0.000466476	32.0804	60.3618	0.85	0.973333	0.995	0.9888	0.989167	0.993878	0.990469	0.997037	0.9908	0.994545	0.998472	0.997278	0.997704	0.998222	1	0.997716	0.998488	1
I13	344.726	26.2563	200	401	290	184.7	22.8	0.479393	0.0161139	13.9909	244.018	1.31557	300.718	634.848	0.487179	0.19255	0.00155864	34.8773	0.000465175	35.7467	61.8693	0.8675	0.955556	0.974375	0.9832	0.985278	0.97898	0.994531	0.995062	0.9946	0.990579	0.998611	0.992899	1	1	0.999414	1	1	0.999058
I16	329.873	26.0204	256	379	278	183.5	15.8	0.480769	0.0173264	4.84719	293.482	1.15283	295.075	604.905	0.486486	0.188282	0.00120255	17.9781	0.000169487	22.8663	49.5437	0.8525	0.943333	0.961875	0.9656	0.979722	0.970612	0.982344	0.990617	0.983	0.991405	0.988472	0.99716	0.992806	0.993511	0.997656	0.995848	0.995864	0.993019
I17	329	27.2718	139	386	280	179.4	24.7	0.487179	0.0131611	0.346965	380.371	0.531998	256.028	649.085	0.487179	0.198233	0.211148	46.2743	0.24178	39.7186	65.5357	0.8575	0.973333	0.975625	0.9872	0.981667	0.993061	0.996406	0.99679	1	0.989421	0.995903	1	1	1	0.995859	1	0.998272	1
I22	338.919	26.2754	243	394	289	188.1	22.5	0.487179	0.014063	0.156071	460.614	0.600675	276.006	646.535	0.487179	0.204345	0.00246275	34.3607	0.000675575	35.7286	60.1508	0.8475	0.984444	0.975625	0.9868	0.985833	0.988163	0.995938	1	0.9979	0.99438	1	0.998225	1	0.998756	0.999414	0.999446	1	0.997175
I23	344.708	24.8148	284	399	292	189.3	18.5	0.487179	0.0142567	0.50666	413.842	0.794154	289.182	658.269	0.475066	0.185882	1.16514	24.7815	0.209448	27.8894	55.407	0.865	0.962222	0.959375	0.9708	0.977778	0.971429	0.99375	0.991111	0.9982	0.99124	0.992153	1	0.995816	0.995644	0.998242	0.998893	1	0.998504
I24	332.767	27.8832	86	388	285	181.4	24.4	0.487179	0.0161175	0.752921	395.137	1.03305	288.052	619.859	0.487179	0.209148	0.471456	43.9159	0.342904	39.7266	64.2492	0.8825	0.962222	0.974375	0.9824	0.993889	0.984898	0.995469	0.992469	0.9991	0.997686	1	0.995976	1	0.999378	1	1	1	0.99856
I26	342.456	25.0849	257	391	290	194	17	0.487179	0.0139504	0.144961	468.616	0.550608	284.663	655.116	0.485564	0.228118	0.0081889	15.9211	0.000284516	25.9698	48.1809	0.835	0.975556	0.97375	0.9844	0.983056	0.984082	0.991406	0.99358	0.9964	0.997686	0.996597	0.996568	0.999337	0.998756	0.998242	0.999446	0.997377	1
I29	335.029	26.5965	165	391	287	189.1	26.9	0.482639	0.0168629	4.69105	300.917	1.17168	300.279	619.564	0.487179	0.218468	0.0205566	46.9215	0.0136141	43.797	67.0472	0.8025	0.987778	0.978125	0.9904	0.985556	0.993878	1	1	0.9952	1	0.998125	0.998698	0.997551	0.997156	0.999414	0.999446	0.999475	0.998061
I31	341.178	26.8443	174	396	287	188.5	18.4	0.481982	0.0165379	9.80726	260.203	1.15321	303.116	628.965	0.4858	0.163592	0.00147269	21.1276	0.000206388	26.999	57.3266	0.835	0.954444	0.953125	0.9772	0.9725	0.988571	0.98375	0.991358	0.9968	0.99686	0.987917	0.997219	0.993112	0.995911	0.992305	0.998893	0.996512	0.994571
I33	350.232	26.3147	159	404	296.01	183.5	22.8	0.481038	0.0154194	3.36375	319.83	1.19546	295.075	641.789	0.487179	0.214447	0.00134315	34.6752	0.00032498	36.205	60.0362	0.855	0.945556	0.960625	0.9664	0.9775	0.984898	0.982969	0.997284	0.9958	0.98876	0.998611	1	0.999337	0.996622	1	0.999446	0.999475	0.997673
I34	349.425	24.7334	296	403	296	198	17.3	0.487179	0.0140614	0.0642091	546.955	0.625057	294.513	664.643	0.486486	0.171983	0.00193172	21.2619	0.000324421	25.7327	54.595	0.82	0.944444	0.97875	0.976	0.99	0.990612	0.980938	0.985926	0.9919	0.991901	0.991597	0.997278	0.996224	0.996267	0.99832	1	0.997438	0.999501
I35	347.195	25.9195	285	402	295	196.8	22.9	0.487179	0.0140471	0.310857	430.074	0.635109	288.772	660.615	0.487179	0.233453	0.627427	38.8996	0.294393	36.8241	59.3789	0.865	0.978889	0.984375	0.992	0.990556	0.990612	0.995938	0.995556	0.9984	0.998512	0.997847	0.998698	0.999337	1	1	1	1	0.997673
I38	335.376	26.1245	144	388	282	182.8	20.2	0.487179	0.0149841	0.750687	374.148	0.83126	279.252	631.992	0.487179	0.18982	0.000913794	30.9955	0.000315297	31.2643	57.6563	0.865	0.974444	0.966875	0.9832	0.974722	0.988571	0.989062	0.993457	0.9973	1	0.997847	0.997988	0.99352	0.997422	1	1	1	0.999501
N01	327.523	28.5995	128	380	282.01	184.2	24	0.479393	0.0154678	3.70527	269.202	0.889352	273.986	618.32	0.487179	0.202467	0.00258676	37.4849	0.000773128	38.1106	63.196	0.8425	0.98	0.986875	0.996	0.991944	0.993878	0.996563	0.996543	0.9958	0.998512	0.998125	1	0.994133	1	1	1	1	1
N02	329.447	26.7571	260	383	284	191.8	17.7	0.4858	0.0195657	2.6014	358.363	1.28016	319.988	597.568	0.486486	0.173326	0.00171207	22.2542	0.000337268	25.6161	54.4342	0.8425	0.977778	0.96875	0.9772	0.979444	0.993878	0.990938	0.986173	0.9933	0.994215	0.995069	0.99858	0.997347	0.999378	0.992578	0.997785	0.996883	0.996066
N03	335.347	26.6819	276	388	284	195.3	18.6	0.487179	0.0150194	0.0731999	518.044	0.646226	290.496	635.952	0.487179	0.217563	0.000391479	29.2103	0.000161626	28.4141	51.594	0.8875	0.982222	0.979375	0.9944	0.983611	0.98898	0.997812	0.997037	0.9906	0.993388	0.997083	0.99858	0.998776	0.999378	0.998242	1	0.997994	0.999003
N04	341.172	27.7521	240	395	290	191.8	20.3	0.487179	0.014161	0.448349	411.877	0.739549	285.29	655.397	0.487179	0.223475	0.00181677	27.8489	0.000229616	32.2352	55.0854	0.8375	0.977778	0.97625	0.992	0.996111	0.973469	0.994844	0.995679	1	0.99438	0.996181	0.996805	0.999337	0.999378	0.998477	0.999446	0.994784	0.999501
N07	329.426	28.5751	179	383	286	186.9	23.6	0.487179	0.0146876	0.269275	403.256	0.552011	270.488	623.626	0.487179	0.30365	0.147698	45.8797	0.277761	39.8472	56.9246	0.85	0.98	0.9725	0.9896	0.985833	0.990612	0.996563	0.995802	1	0.999174	0.994861	0.99858	1	1	1	1	1	1
N10	337.648	28.1884	247	392	289	194.1	21.7	0.487179	0.0145458	0.388863	411.852	0.666389	288.712	647.65	0.487179	0.201161	0.000957687	30.0264	0.000167215	33.5859	58.4482	0.8275	0.974444	0.970625	0.9848	0.99	0.991633	1	0.99358	0.9945	0.994628	1	0.996923	0.99699	0.999378	0.999414	0.999446	0.999475	1
N11	334.986	27.8758	258	389	282	198.7	22.9	0.487179	0.0164933	0.401478	391.693	0.560388	295.554	611.077	0.486486	0.267056	1.5009	36.2082	0.287427	37.7447	57.5377	0.895	0.982222	0.98375	0.996	1	0.997551	0.995313	1	1	1	1	0.997633	0.997653	1	0.998125	0.997647	1	0.997507
N13	330.624	28.5904	213	385	281	190.9	17.7	0.485795	0.0153376	1.56768	314.932	0.72141	280.115	621.624	0.4858	0.179818	0.0369734	19.3144	0.00373135	26.3276	54.0784	0.8525	0.944444	0.963125	0.966	0.984722	0.973469	0.987187	0.982593	0.987	0.990248	0.992361	0.99432	0.994643	0.996444	0.995977	0.993218	0.995895	0.998006
N14	336.801	27.1197	282	390	282	200	16.9	0.485795	0.0163449	4.7638	278.472	0.775393	309.548	631.156	0.485795	0.186584	0.0422383	4.05802	0.000300009	25.1377	51.9739	0.8075	0.968889	0.975625	0.974	0.983056	0.985102	0.987656	0.996049	0.9973	0.992727	0.993889	0.99645	0.994337	0.9944	0.994102	0.997232	0.998426	0.995125
N15	336.633	26.6392	286	390	287	189.7	22.7	0.484733	0.0154928	7.09577	236.679	0.819492	289.793	632.969	0.487179	0.216944	0.00115767	34.7614	0.000312907	36.0462	59.3166	0.8575	0.982222	0.97875	0.9824	0.988333	0.992653	0.996406	0.995062	1	0.997686	1	1	0.998673	1	1	1	1	1
N16	329.758	28.6796	247	385	283	195.6	20.9	0.484298	0.0157426	2.14562	285.013	0.584577	287.011	617.27	0.487179	0.204415	0.00175882	32.6631	0.000547361	33.1879	57.9739	0.855	0.983333	0.978125	0.9896	0.994167	0.991429	0.995156	0.999012	0.9991	0.999174	0.999236	1	0.996071	0.999378	0.999414	0.998962	0.998951	1
N17	345.501	25.2041	290	399	295	192.5	20.8	0.477855	0.0180425	6.63702	310.958	1.35875	317.286	619.095	0.487179	0.219556	0.00147007	30.5945	0.00033488	32.6111	55.606	0.845	0.984444	0.97375	0.9716	0.995833	0.997959	0.991094	0.991605	0.9991	0.997686	0.997847	1	1	1	0.998828	0.999446	1	1
N18	335.929	30.6155	135	391	286	184.7	26.3	0.479393	0.0165699	13.6788	237.553	1.25237	293.292	619.998	0.486486	0.212456	0.0851676	42.6629	0.0275714	42.8201	66.609	0.8775	0.982222	0.976875	0.9808	0.983889	0.996327	0.997031	0.994815	0.9991	0.999174	1	1	0.997092	0.996933	0.999414	1	1	0.997562
N19	331.353	28.1021	237	386	281	187.3	20.5	0.477855	0.0155289	3.8965	282.514	0.94736	289.7	627.1	0.473958	0.185029	7.27798	13.5459	0.0918565	31.3166	58.9246	0.8225	0.961111	0.981875	0.9808	0.988333	0.993878	0.992188	0.999012	0.9946	0.992893	0.996181	0.993373	0.999337	0.996444	0.996641	0.993772	0.998488	0.999501
N22	319.739	29.0472	197	373	273	192.1	21.9	0.48642	0.0158162	2.33692	262.556	0.530638	278.014	606.225	0.487179	0.23284	0.21843	37.7481	0.123167	35.2161	57.2261	0.8475	0.988889	0.98875	0.996	0.996111	0.996327	0.996719	1	1	1	0.999236	0.99929	0.999337	0.999378	0.995195	1	1	0.999501
N23	335.504	27.3108	269	388	282	199.2	16.8	0.485795	0.0158869	6.93282	240.496	0.711718	304.306	632.635	0.481982	0.175182	0.00962035	10.7707	0.000317957	24.3136	53.0171	0.845	0.953333	0.971875	0.9816	0.990833	0.984286	0.99125	0.982716	0.9934	0.993388	0.990833	0.99787	0.99148	0.994667	0.995195	0.996401	0.996451	0.998006
N25	340.743	28.4365	190	395	290	192.7	20.6	0.487179	0.0158743	0.782718	402.258	0.988255	302.123	635.232	0.487179	0.177207	0.00124141	30.7056	0.000367426	31.8834	60.0402	0.8375	0.964444	0.9675	0.9848	0.982778	0.984694	0.989531	0.991605	0.9964	0.994545	0.997083	0.996923	0.997041	0.998133	0.997656	0.999446	0.999475	0.998338
N29	335.655	28.9753	34	390	285	185.4	19	0.485795	0.0158995	10.5303	231.488	1.00968	290.677	626.074	0.4858	0.148421	0.00270807	16.6203	0.000193148	27.4975	61.1055	0.815	0.944444	0.948125	0.9588	0.970833	0.978367	0.979062	0.981358	0.979	0.987107	0.983611	0.98645	0.988622	0.991911	0.995898	0.995986	0.993395	0.995512
N30	345.095	27.4725	238	399	295	195.8	23.1	0.476543	0.0161831	3.53931	329.99	1.23922	306.983	641.516	0.487179	0.197267	0.00172004	34.6944	0.00046469	36.2171	61.2905	0.8425	0.972222	0.96625	0.9912	0.997222	0.997551	0.997656	1	0.9918	0.994545	1	0.997515	1	0.9976	1	1	0.997531	1
T01	333.856	27.4099	280	387	286	179.8	22.1	0.475578	0.0160604	10.6771	254.925	1.39277	289.126	628.848	0.487179	0.227408	0.0931672	38.5466	0.0600628	35.5377	57.7487	0.8475	0.968889	0.973125	0.9624	0.987778	0.987551	0.99	0.986914	0.9954	0.992562	0.997847	0.99929	0.999337	0.996	0.998828	0.997509	0.999475	0.997673
T04	351.454	27.2534	243	407	299	203.5	24.5	0.487179	0.0165925	0.866325	407.531	0.948811	319.055	642.201	0.487179	0.25351	0.00238547	38.6987	0.000555317	40.3819	60.0804	0.8625	0.984444	0.99	0.9936	1	1	1	0.997778	0.9967	0.995537	1	0.99929	1	0.997511	1	1	0.999475	0.999058
T05	331.055	28.4988	182	387	279	184.6	19.9	0.487179	0.0144892	0.361406	404.221	0.667521	274.581	634.505	0.486486	0.167063	0.0351108	30.2825	0.013572	29.6	59.6	0.8975	0.943333	0.9725	0.9808	0.971389	0.982041	0.985625	0.986543	0.9939	0.995537	0.992639	0.993964	0.995459	0.997511	0.99832	0.996886	1	0.999003
T07	347.478	27.5475	187	402	298	202.6	18	0.485795	0.0164149	9.98811	272.799	1.08193	321.717	647.506	0.486486	0.16772	0.000952412	23.8111	0.000229992	26.0503	55.7186	0.85	0.96	0.97625	0.9644	0.986944	0.973469	0.987812	0.988148	0.9982	0.994711	0.996319	0.995148	0.995459	0.999378	0.995547	0.998339	0.996481	0.997341
T09	345.788	26.7861	288	400	295	197.6	24.1	0.479798	0.0154277	2.257	336.544	0.984043	301.861	647.413	0.487179	0.315808	1.51785	42.1499	0.549455	41.1759	58.1307	0.8475	0.988889	0.9875	1	0.991944	0.996327	0.998906	0.997531	1	1	1	0.996805	1	1	1	1	1	1
T10	318.17	32.3549	50	377	274	181.7	28.2	0.4858	0.01618	1.99692	292.984	0.764619	270.267	595.319	0.487179	0.155026	0.00234551	46.7433	0.00123817	44.2131	76.5226	0.8475	0.98	0.97875	0.984	0.983611	0.992653	0.992969	0.995556	0.9982	1	0.995486	0.99716	1	0.995556	1	0.999446	1	0.996842
T14A	330.701	26.0982	284	384	281	192.2	20.5	0.477855	0.0154346	4.88721	272.887	0.947489	289.749	637.447	0.487179	0.221725	0.00148844	30.5584	0.00034698	32.5528	55.2161	0.8825	0.984444	0.985625	0.9952	0.989444	0.997551	0.9975	0.996543	0.9991	0.997521	1	0.998698	0.999337	1	0.999414	0.997509	1	0.999501
T22A	335.25	25.7598	286	389	285	193	18.8	0.485795	0.0160685	1.85432	335.326	0.884538	298.714	628.462	0.487179	0.216812	0.362798	33.2762	0.267602	29.4754	52.9045	0.855	0.967778	0.96375	0.9808	0.990556	0.993469	0.988594	0.99358	0.9955	0.996694	0.992153	0.997278	0.998112	0.999378	0.997656	1	1	0.998504
T23	341.336	26.9052	238	394	297	196.3	15.5	0.479167	0.0145948	3.44039	300.178	0.890596	299.875	662.882	0.485795	0.137631	0.000916012	19.9854	0.000290298	20.8744	57.0151	0.8025	0.931111	0.94125	0.9512	0.958056	0.974694	0.969688	0.971235	0.9822	0.980661	0.978125	0.987456	0.978265	0.9816	0.990352	0.991453	0.988796	0.989695
T24	337.532	28.96	230	393	290	193	21.7	0.473958	0.0161249	3.40819	303.66	1.01421	294.834	624.583	0.487179	0.206743	0.125677	41.0574	0.148987	34.8945	59.3206	0.835	0.964444	0.976875	0.9768	0.989167	0.993469	0.997812	0.998025	0.9973	0.995702	0.999236	0.99929	0.999337	0.995467	0.997656	1	0.997284	1
T25A	336.788	27.699	262	392	286.01	199.8	17.5	0.484298	0.017867	0.693364	421.423	1.06954	317.27	618.476	0.487179	0.162412	0.00111922	24.338	0.000315395	26.0302	56.6332	0.8225	0.962222	0.980625	0.9824	0.990556	0.973469	0.986875	0.997037	0.9949	0.987355	0.987986	0.99716	0.992806	0.995822	0.992539	0.996194	0.995802	0.996011
T29A	337.885	28.0546	246	393	287	192.9	20.9	0.487179	0.0162305	0.0498766	546.744	0.773946	298.559	620.382	0.487179	0.172536	0.0323801	36.4253	0.027008	31.5075	60.4945	0.8275	0.97	0.97125	0.9808	0.983333	0.989388	0.991094	0.998272	0.9961	0.997521	0.999236	0.996805	0.998673	1	0.998125	0.999446	1	0.999501
T30A	327.335	27.9867	254	383	281	180.1	30	0.487179	0.0160488	0.555274	400.154	0.936047	282.368	611.797	0.487179	0.338504	0.976918	56.6893	0.912083	52.4623	68.7437	0.8775	0.984444	0.9875	0.9888	0.988889	0.993878	1	1	0.9975	0.993884	0.995347	0.99787	1	1	1	1	0.999475	0.999501
T35	342.03	27.3318	280	397	292	202.7	17.5	0.487179	0.0155924	0.622559	407.243	0.779941	309.652	647.825	0.487179	0.153173	0.000795939	23.5397	0.000226079	24.9749	57.6884	0.825	0.955556	0.984375	0.9752	0.983611	0.988163	0.983125	0.99321	0.9928	0.988843	0.991597	0.991834	0.995357	0.996889	0.994492	0.997855	0.995802	0.998504
T36B	336.742	27.7897	224	391	284	184.9	25.3	0.482639	0.0161158	4.69959	294.026	1.12759	293.61	628.103	0.487179	0.279535	0.84065	45.0426	0.40708	43.2261	62.0422	0.8925	0.975556	0.98875	0.992	0.986667	0.989388	1	0.997531	1	0.995702	1	1	0.997704	0.995289	1	1	0.998272	1
T39	336.153	27.2856	277	390	287	192.7	18.7	0.4858	0.0163673	5.41589	279.187	0.960297	302.123	627.485	0.485795	0.177397	0.0975819	4.51553	0.000575392	27.8151	55.6302	0.855	0.954444	0.98375	0.9692	0.990833	0.991429	0.992344	0.993333	0.9946	0.994876	0.996944	0.99645	0.99648	0.997511	0.996484	0.996678	0.998426	0.999501
T43A	346.723	27.847	270	404	290.01	200.7	23.4	0.484733	0.0153167	2.60455	319.495	0.85227	306.597	649.502	0.487179	0.179604	0.00136732	34.3509	0.000345008	36.2171	63.9678	0.8525	0.982222	0.979375	0.992	0.990278	0.985306	0.995469	0.999012	0.996	0.996529	1	1	0.997551	0.996889	1	1	0.999475	1
T45B	339.597	29.3297	152	394	287	199.3	25.1	0.487179	0.0154811	0.453136	424.604	0.809924	300.452	640.965	0.487179	0.19003	0.012191	36.8209	0.00234291	39.8573	66.597	0.8575	0.977778	0.99125	0.996	0.998611	0.996327	0.994844	0.998025	1	1	1	0.997633	1	0.997511	1	1	1	1
ZH23	331.854	28.63	236	390	285	189.9	23	0.487179	0.0149476	0.505634	400.553	0.780569	282.464	637.453	0.487179	0.204053	0.0674672	40.1835	0.0493149	36.5226	61.0251	0.8625	0.972222	0.976875	0.9864	0.988333	0.997959	0.995156	0.993333	0.9991	0.995041	0.998611	1	1	1	0.99832	1	0.998951	1
ZH26	347.364	31.0905	139	407	298	198	27.6	0.484298	0.0143725	3.10887	292.444	0.846805	290.533	656.683	0.487179	0.221032	0.683761	51.3399	0.531017	46.601	70.4563	0.8075	0.977778	0.98625	0.984	0.993889	0.996735	0.994219	0.997531	0.9991	0.997521	1	0.998698	1	1	0.999414	1	1	0.997562
ZH33	330.325	26.1777	280	381	280	179.5	15.8	0.478947	0.0151381	5.04838	247.486	0.89778	274.211	624.191	0.4858	0.175899	0.00458557	15.4246	0.000420422	23.1839	51.4492	0.81	0.93	0.955625	0.954	0.968611	0.985306	0.9775	0.98716	0.9917	0.988017	0.987431	0.993846	0.985102	0.993867	0.996133	0.993772	0.990093	0.994127
ZH42	351.583	27.3898	156	405	299	201.8	24.4	0.487179	0.0125884	0.289443	395.301	0.365338	283.94	689.568	0.487179	0.271196	0.153819	42.6492	0.0828485	40.7075	59.8352	0.85	0.991111	0.995625	0.9984	0.995	0.997959	1	1	1	1	1	1	1	1	0.998125	1	0.998272	1
ZS10	353.029	26.3542	269	405	301	201.8	27.1	0.484733	0.014033	2.31704	285.739	0.594259	292.052	665.23	0.487179	0.432419	2.40104	50.4567	0.994197	49.0251	62.0985	0.88	0.987778	0.983125	0.9968	0.991667	1	1	0.995802	0.9982	1	1	1	1	1	1	0.997924	1	0.997562
ZW09	330.245	25.1499	281	384	278	181.4	20.6	0.487179	0.015463	0.627629	383.478	0.880413	273.467	616.213	0.487179	0.237023	0.301763	35.1071	0.176073	32.7116	54.2432	0.8625	0.968889	0.96375	0.9808	0.988611	0.993878	0.995625	0.998025	0.9982	0.997025	0.995278	0.994438	0.998776	1	0.998477	1	1	0.999501
ZW139	335.903	26.0479	258	391	289	194.7	24.8	0.487179	0.0163027	0.731224	398.741	0.912251	301.345	626.171	0.487179	0.262669	0.527936	45.0811	0.432524	40.8764	60.8161	0.8425	0.977778	0.989375	0.992	0.985556	1	0.994687	1	0.996	1	0.997292	1	1	1	1	1	0.998611	1
ZW140	348.235	24.7827	287	404	294	186.4	19.3	0.482639	0.014763	7.8831	259.185	1.14734	292.245	655.678	0.487179	0.212499	0.185477	36.6685	0.217776	30.6472	54.6995	0.8275	0.933333	0.955625	0.9624	0.975278	0.981837	0.984844	0.98642	0.9852	0.995785	0.994653	0.995976	0.996786	0.998133	0.998828	0.997578	0.999475	1
ZW142	339.35	25.5422	271	393	287	189.2	26	0.487179	0.0164574	0.619486	415.287	1.03515	300.438	623.694	0.487179	0.31196	1.99906	45.8767	0.721906	44.4221	62.191	0.86	0.971111	0.978125	0.9848	0.987778	0.99551	0.994219	0.995309	0.9991	1	1	1	0.996888	1	0.999414	0.995433	0.997994	0.999501
ZW144	336.789	26.2162	258	388	282	196.9	18.5	0.487179	0.0150613	0.381395	404.789	0.592048	292.876	637.204	0.486486	0.200033	0.118338	28.7356	0.0432389	28.6332	53.5477	0.8725	0.954444	0.9825	0.984	0.988889	0.993061	0.998906	0.997778	0.993	0.999174	0.996181	0.995266	0.998673	0.998756	1	0.998962	0.999012	0.998033
ZW155	338.241	27.3718	276	392	286	198.8	22.7	0.477855	0.0165294	2.65229	320.752	0.941525	299.698	623.373	0.487179	0.235868	0.00127158	36.2344	0.000420323	36.5025	57.9477	0.8325	0.982222	0.979375	0.9896	0.996111	0.996327	0.997812	0.998272	1	1	0.998472	1	1	1	1	1	1	1
ZW177	336.794	26.6401	240	391	289.01	190.2	19.9	0.486486	0.0153513	1.50913	337.145	0.82054	290.557	634.637	0.487179	0.197578	0.00158636	30.7311	0.000535297	30.8	56.4	0.8425	0.968889	0.975	0.9856	0.997222	0.997551	0.992031	0.990617	0.9917	0.997521	0.992292	0.99858	0.998673	0.999378	1	0.998408	0.999475	0.999501
ZW184	342.995	27.0939	279	397	290	195.5	19.7	0.487179	0.0147679	0.56778	383.879	0.60934	294.724	648.392	0.487179	0.183719	0.000688376	34.2573	0.000508977	30.0945	57.4171	0.82	0.963333	0.97125	0.9752	0.989722	0.988776	0.993281	0.995062	0.9982	0.997521	0.995556	0.99574	0.998673	1	0.999414	0.995986	1	1
ZW185	336.154	27.1266	268	391	287	188.6	23.8	0.487179	0.0131165	0.454932	375.413	0.538766	269.158	663.417	0.487179	0.231836	0.232991	45.9249	0.37123	38.7497	61.2342	0.865	0.977778	0.97125	0.992	0.992222	0.998776	0.997656	1	0.9991	0.99438	0.998125	0.995266	0.999337	1	1	1	0.998488	0.99867
