# Supplementary material for: Double insertion of transposable elements provides a substrate for the evolution of satellite DNA
Source: HighWire-hosted journal article supplement (doi:10.1101/gr.231472.117), 2018-03-27
Supplement: Supplemental_Table_S2.xlsx [file Supplemental_Table_S2.xlsx]

## Sheet: LTR Tandems
Repeat	LTR Length	Frequency
ACCORD_LTR	558	0
Chouto_LTR	618	0
DM176_LTR	512	0.0352941
DM297_LTR	414	0.211765
DM412_LTR	481	0.176471
GTWIN_LTR	495	0.0117647
GYPSY_LTR	482	0.117647
Gypsy1_LTR_DM	408	0
GYPSY12_LTR	2336	0
GYPSY5_LTR	430	0.0235294
GYPSY6_LTR	407	0
IDEFIX_LTR	594	0.305882
INVADER1_LTR	423	0
MDG1_LTR	442	0.0588235
MICROPIA_LTR	476	0.0117647
NOMAD_LTR	518	0.105882
Phanio_LTR	625	0
Pifo_LTR	443	0
QUASIMODO_LTR	658	0.658824
QUASIMODO2_LTR_DM	498	0
ROO_LTR	428	0.2
STALKER2_LTR	424	0.0235294
STALKER4_LTR	402	0.0117647
TABOR_LTR	506	0.129412
TIRANT_LTR	417	0
ZAM_LTR	472	0.0117647

## Sheet: Inverted Tandems
Repeat	Type	Frequency
DNAREP1_DM	H	1
PROTOP	H	0.976471
QUASIMODO_LTR	H	0.2
P-element	H	0.0941176
DOC	H	0.0352941
TABOR_LTR	H	0.0235294
Jockey	H	0.0235294
IDEFIX_LTR	H	0.0235294
FW	H	0.0235294
DM412_LTR	H	0.0235294
DM412_I	H	0.0235294
DM297_LTR	H	0.0235294
DIVER_I	H	0.0235294
BLOOD_LTR	H	0.0235294
S_DM	H	0.0117647
QUASIMODO_I	H	0.0117647
DMRT1B	H	0.0117647
DNAREP1_DM	T	1
PROTOP	T	0.764706
ROVER_LTR	T	0.717647
ROO_LTR	T	0.247059
DMRT1B	T	0.176471
G2_DM	T	0.141176
FW	T	0.105882
DM297_LTR	T	0.0941176
Jockey	T	0.0823529
HOBO	T	0.0705882
DOC	T	0.0705882
DM412_LTR	T	0.0470588
TABOR_LTR	T	0.0352941
S_DM	T	0.0352941
M4DM	T	0.0352941
DOC6_DM	T	0.0352941
QUASIMODO_LTR	T	0.0235294
DM1731_I	T	0.0235294
STALKER4_I	T	0.0117647
ROVER_I	T	0.0117647
POGO	T	0.0117647
P-element	T	0.0117647
MDG3_I_DM	T	0.0117647
MAX_I	T	0.0117647
IDEFIX_I	T	0.0117647
HETA	T	0.0117647
