# Supplementary material for: Double insertion of transposable elements provides a substrate for the evolution of satellite DNA
Source: HighWire-hosted journal article supplement (doi:10.1101/gr.231472.117), 2018-03-27
Supplement: Supplemental_Table_S3.xlsx [file Supplemental_Table_S3.xlsx]

## Sheet: Sheet1
	Information about TE insertion												Information about tandem junction
General information					Insertion Junction 1		Insertion Junction 2		Annotations						Junction identified in reads		Junction estimated from read pairs
Strain	Element	Chrom	Strand	Estimated Pos	Chrom	Repeat	Chrom	Repeat	Nearest TSS	Distance to TSS	Motif location	Pericentric Heterochromatin	Supporting Reads	Motif	- Strand	+ Strand	- Strand	+ Strand
T24	DMCR1A	2R	+	1.98195e+06	nan	nan	1.98195e+06	4596.97	Maf1	454739	1.98183e+06	TRUE	2	ATTATTTATATACTAAATAATCAAAACA	2160	4470	2286.23	4547.27
B42	DMRT1A	3L	-	1.1278e+07	1.12784e+07	4268.94	1.12775e+07	5167.98	scyl	26209	1.12785e+07	FALSE	1	CACAACA	476	5183	572.52	5281.15
I22	DMRT1A	3L	-	1.12779e+07	1.12785e+07	4231.21	1.12774e+07	5283.79	scyl	26209	11278515	FALSE	1	CACAACAA	477	5183	480.086	5191.73
B51	FW	2L	+	1.1672e+07	1.1672e+07	-10.7997	1.1672e+07	4725.32	spag4	60233	1.1672e+07	FALSE	1	AAAAAAAAAGAATGCGACCCGTCAACCAAAAGACT	4423	4692	4345.25	4693.97
I35	FW	2L	+	1.74517e+07	1.74516e+07	283.653	1.74518e+07	4745.47	dl	1362	1.74517e+07	FALSE	1	AAAATTAAAGTTGGATGGTCGG	1722	4692	1525.5	4684.8
N01	FW	2L	-	2.27572e+07	2.27572e+07	52.8097	2.27572e+07	4771.26	lt	167522	22757272	TRUE	1	ATGTAAATACTTA	4287	4687	4357.84	4684.96
I26	HETA	3L	+	52276.1	nan	nan	52276.1	6099.56	Lsp1gamma	14220	52209	FALSE	1	AGTTAAAA	3804	6081	3800.32	6079.86
B11	HOBO	2L	-	1.36021e+07	1.36021e+07	3.88486	nan	nan	mir-2489	7885	1.36021e+07	FALSE	1	CTGTAAAGTAATTTGAGC	1	3016	62.8849	2862.78
I03	HOBO	2L	-	1.7943e+07	1.7943e+07	56.7996	1.79431e+07	2979.96	btv	39436	17943036	FALSE	57	GTCCCCAC	1	3016	-9.41248	3011.89
B05	Jockey	2R	+	1.54339e+07	1.54339e+07	4669.67	1.54338e+07	4934.58	Mtk	25073	1.54339e+07	FALSE	2	AAACGAACTGCCACCCCGTTTTTTTTACGATTACG	4710	5007	4650.54	5031.33
B10	Jockey	2R	+	2.22876e+07	2.22875e+07	-8.22462	2.22876e+07	5073.43	wdp	13880	22287543	FALSE	5	CGTAAAGAAAAATGCATTTGAGGATATAG	6	5007	45.8897	5080.11
I06	Jockey	3R	+	7.88564e+06	7.88557e+06	4659.36	7.8857e+06	5084.24	ArgRS-m	1393	7885651	TRUE	2	AAACACTCAATAACCAAAGC	4760	5020	4742.33	5037.67
I06	Jockey	3L	+	2.23395e+07	2.23394e+07	-80.7044	2.23395e+07	4998.22	IleRS	50850	22339514	TRUE	10	ACCACCACTTCACACGGTTTTTTATTACG	1759	5007	1778.04	5052.92
I24	Jockey	3R	+	31458474	3.14585e+07	3356.99	3.14585e+07	5048.13	lox	1385	31458484	TRUE	6	CGAAATAAATTCATTTCAAATGATCCAGCCATCTAGC	3410	5007	3438.75	5067.98
I29	Jockey	3L	-	299343	299405	4689.36	299281	5095.37	RhoGEF3	1245	299324	FALSE	1	AAAAAAAAAAAGTAAAAAAGCCCCTTTTGTTATGCAGGGCGATTTGAT	3704	5020	3618.95	5023.98
I31	Jockey	2R	+	2.11999e+07	2.11998e+07	52.9564	2.11999e+07	5118.16	Glycogenin	614	2.11999e+07	FALSE	1	AAAAGAGACGAAGAGCGACGAGATG	4593	5007	4538.41	4907.59
I34	Jockey	2R	-	2.0709e+07	2.0709e+07	4373.2	2.07089e+07	5108.31	dpr1	10519	20709001	FALSE	7	CAAGTTGAGTATGCTGACAGCTTTTGCGATTACG	566	5007	552.408	5024.07
T30A	Jockey	3L	+	2.23395e+07	2.23395e+07	-57.6673	2.23396e+07	5088.17	IleRS	50848	2.23395e+07	TRUE	2	ACTACCACTTCACACGGTTTTTTATTACG	1759	5007	1738.22	5017.67
ZW140	Jockey	2L	+	1.79984e+07	1.79984e+07	3922.01	1.79984e+07	5110.12	Prosbeta5R2	7982	17998399	FALSE	1	CGACCAAGCTTACGTACTAATTATTTTTTTTTTTTTTTTTTTACGATTACG	7	5007	-8.31252	5044.56
ZW185	Jockey	3R	+	5.73323e+06	nan	nan	5.73323e+06	5087.45	Sym	9103	5.73337e+06	TRUE	5	CGTAATC	2484	5007	2536.92	5062.2
B11	P-element	3R	-	2.12965e+07	nan	nan	2.12965e+07	2905.45	Hsromega	88	21296532	TRUE	2	CTCCAACC	1	2907	-35.5254	2949.83
B23	P-element	3L	+	2.04017e+07	nan	nan	2.04017e+07	2998.95	trbl	8	20401617	FALSE	1	ATCCACGC	1	2907	44.8377	2945.47
B23	P-element	3R	-	2.12965e+07	2.12965e+07	-24.5373	2.12965e+07	2938.95	Hsromega	124	21296496	TRUE	2	CGTGCTCC	1	2907	44.8377	2945.47
B38	P-element	3L	+	21011277	2.10112e+07	-70.2039	2.10113e+07	2989.2	scaRNA:PsiU6-40	4754	21011274	FALSE	1	ACGTCACC	1	2907	105.546	3013.95
B42	P-element	2R	+	1.05417e+07	1.05417e+07	-10.8131	1.05418e+07	2710.6	lola	35	10541705	FALSE	6	GGTTCCCA	1	2907	81.1869	2979.63
B51	P-element	2R	-	1.00522e+07	1.00521e+07	-9.77875	1.00522e+07	2871.82	sel	38	10052129	FALSE	4	AATTGTGG	1	2907	3.92488	2919.44
B51	P-element	3R	+	2.37729e+07	2.37729e+07	52.1563	nan	nan	tst	13	23772846	TRUE	1	GTCCATCCAAATTATCTGCCGAC	1	2907	3.92488	2919.44
B54	P-element	X	-	765612	765612	1108.5	nan	nan	RpL22	406	765536	FALSE	2	CTCCTCGCCATAGTTTTATGATATATGGTCACAGGGGCGGGCC	1	2907	-32.3165	2902.07
B54	P-element	X	+	1.5789e+07	1.5789e+07	80.1674	1.5789e+07	2958.9	Rhp	11	15788885	FALSE	4	CTCGAGCC	1	2907	-32.3165	2902.07
I01	P-element	3R	-	1.34019e+07	1.34019e+07	-9.22251	1.34019e+07	2934.22	GILT1	14	13401876	TRUE	3	CGTCAAGC	1	2907	-4.5383	2915.17
I01	P-element	2R	+	1.60313e+07	1.60313e+07	688.635	1.60313e+07	2937.22	SP2353	489	16031440	FALSE	1	CTCTAGAG	1	2907	-4.5383	2915.17
I01	P-element	3R	-	1.80495e+07	1.80495e+07	-68.3892	1.80494e+07	2329.47	htl	48	18049414	TRUE	1	ATCGCGACTATTCCGATTCTCTACCTCTCTTAAATCTCCCACAC	1	2907	-4.5383	2915.17
I22	P-element	3L	-	3.25052e+06	3.25052e+06	1414.22	3.25052e+06	2935.75	mir-282	420	3250601	FALSE	2	CTCTGGCA	1	2907	49.079	2974.69
I22	P-element	2R	-	1.20199e+07	1.20198e+07	158.041	1.202e+07	2883.96	otk	99	12019945	FALSE	2	CTCCGGAGGAATATACCTACTCGTGAC	1	2907	49.079	2974.69
I23	P-element	3L	-	6.21871e+06	6.2187e+06	55.2175	6.21873e+06	2943.1	LanA	735	6218757	FALSE	3	CTCTGAAC	1	2907	47.146	2963.56
I26	P-element	X	-	1.98872e+07	1.98872e+07	-7.11693	1.98871e+07	2911.6	Hers	197	1.98872e+07	FALSE	8	CCTGTGGGCCAGCG	1	2907	13.3104	2929.46
N01	P-element	X	-	1.07449e+07	1.07448e+07	101.238	1.07449e+07	2936.51	stx	58	10744885	FALSE	6	CTCCAGGC	1	2907	-22.3715	2910.35
N03	P-element	3L	+	1.58653e+06	1.58653e+06	-9.87355	1.58652e+06	2888.01	Pex10	27762	1586543	FALSE	2	CATCGGCA	1	2907	4.96931	2919.99
N10	P-element	2R	+	8.15227e+06	8.15222e+06	-55.824	8.15232e+06	2951.6	kermit	2843	8152278	FALSE	7	AGTTGGGG	1	2907	32.6946	2940.34
N14	P-element	2L	-	1.67914e+07	nan	nan	1.67914e+07	2928.73	Cyt-b5-r	714	1.67914e+07	FALSE	2	CTGTTACTTTTTCCTGATAAGAAGTGAGAGCCACTGAGAGGAAAGCTTTCAATCGGCGATACTCTCGTGTC	1	2907	18.327	2931.13
N16	P-element	3L	+	1.79725e+07	1.79724e+07	-96.1288	1.79725e+07	2938.55	Eip75B	1069	1.79725e+07	FALSE	3	GTTCAGTTCAAC	1	2907	-29.2121	2878.75
N17	P-element	X	+	1.98871e+07	1.98872e+07	46.0828	1.98871e+07	2925.75	Hers	242	1.98871e+07	FALSE	4	GCCAAGAGGCGACAAGTGTTGGCC,GCCCAGAGGCGACAAGTGTTGGCC,GCCCAGAGGCGACAAGTGGTGGCC	1	2907	93.4495	3011.85
N18	P-element	X	-	5.36495e+06	5.36494e+06	167.536	5.36497e+06	3044.11	SK	255	5364969	FALSE	1	AGCCGCAG	1	2907	37.769	2961.63
N18	P-element	3R	+	8.2504e+06	8.25035e+06	-56.5643	8.25046e+06	2900.46	mtg	68	8250428	TRUE	8	AGCCGAAG	1	2907	37.769	2961.63
N18	P-element	3L	+	1.79724e+07	1.79724e+07	-113.964	nan	nan	Eip75B	1069	1.79725e+07	FALSE	7	GTTCAGTTCAAC	1	2907	37.769	2961.63
N19	P-element	2L	+	9.38768e+06	9.38768e+06	72.8233	nan	nan	Aldh	119	9387677	FALSE	1	CGCTGAAC	1	2907	-61.313	2887.22
N19	P-element	2R	-	15676041	1.5676e+07	152.323	1.56761e+07	2906.53	fus	163	15676116	FALSE	1	CAATAGGC	1	2907	-61.313	2887.22
N19	P-element	3R	-	1.9837e+07	nan	nan	1.9837e+07	2706.93	bnl	59	19836876	TRUE	1	ACCCTGTC	1	2907	-61.313	2887.22
N19	P-element	X	+	2.28938e+07	2.28939e+07	34.8789	2.28938e+07	2832.34	fog	38698	22893892	TRUE	1	GCCTGGCC	1	2907	-61.313	2887.22
N22	P-element	3R	-	2.79058e+07	nan	nan	2.79058e+07	2912.37	mil	6645	27905801	TRUE	1	CTCTCGTC	1	2907	-9.14706	2909.26
N25	P-element	2R	+	9.40966e+06	nan	nan	9.40966e+06	1545.37	wun	153	9.40965e+06	FALSE	9	CGTCATGTCATCTCTTCAGTACTAAG	1	2907	-22.0824	2908.37
N30	P-element	3L	-	959444	959412	86.2027	959475	2928.55	Glut1	175	959484	FALSE	3	GGTACGGA	1	2907	32.0681	2945.93
T07	P-element	2L	-	1.62519e+07	1.62519e+07	1039.09	1.62519e+07	2809.24	PRL-1	63	16251851	FALSE	1	CCGGGGAG	1	2907	-73.3755	2846.01
T07	P-element	3R	+	2.60217e+07	2.60217e+07	418.261	2.60216e+07	2836.57	E(spl)m3-HLH	105	26021717	TRUE	3	CCTGGGAG	1	2907	-73.3755	2846.01
T14A	P-element	3R	+	7.88684e+06	7.8869e+06	2472.65	7.88679e+06	2928.35	ArgRS-m	301	7886743	TRUE	1	ACTGAACCTGAACTGAAAGGTCCCACA	1	2907	8.35622	2913.49
T14A	P-element	2L	-	1.66837e+07	1.66836e+07	93.6493	1.66837e+07	2927.6	grp	1657	16683732	FALSE	5	GTGTGAAC	1	2907	8.35622	2913.49
T14A	P-element	2R	-	2.1872e+07	2.1872e+07	636.364	2.1872e+07	2945.15	Fili	33	21871996	FALSE	1	CGCCTGCGTTTAGCGAACAAACGAACGAGCCACTTTCCTTACATTCGAATTTCCTTCGGCTGGAA	1	2907	8.35622	2913.49
T29A	P-element	3L	+	9.34958e+06	9.34961e+06	70.5576	9.34954e+06	2924.07	PGRP-LF	67	9349541	FALSE	3	CCCCGGAC	1	2907	-10.2902	2897.99
T29A	P-element	X	+	1.98872e+07	1.98872e+07	73.7243	1.98871e+07	2913.39	Hers	229	19887123	FALSE	2	GCCCAAAC	1	2907	-10.2902	2897.99
T35	P-element	2R	-	2.35808e+07	2.3581e+07	-142.682	2.35807e+07	2975.13	apt	290	23580799	FALSE	2	AATCAGCC	1	2907	-1.8976	2903.66
T43A	P-element	2L	-	1.91654e+07	1.91654e+07	-53.3613	1.91654e+07	2880.08	brat	481	19165385	FALSE	2	AACTTCCCCCCAGAAAGAGCAACAATTTTCCACGCCAAAATACACTTTTTTTTGCGCGCGCT	1	822	-162.695	965.028
ZH26	P-element	2L	+	7.57662e+06	nan	nan	7.57662e+06	2909.83	RapGAP1	26	7576633	FALSE	2	GGCCAGAC	1	2907	70.4289	2986.35
ZH33	P-element	X	+	2.65849e+06	2.65856e+06	1375.84	2.65843e+06	2832.16	sgg	120	2658645	FALSE	1	ATATGAAC	1	2907	66.8375	3016.5
ZH33	P-element	3R	-	1.27198e+07	nan	nan	1.27198e+07	3035.16	Men	205	1.272e+07	TRUE	1	CGCCGGTATATCCCACCGCCAACAATTCGCAGAGTCCTTCCTCATATAGTCGCGGC	1	2907	66.8375	3016.5
ZW139	P-element	3R	-	1.41087e+07	1.41086e+07	-11.4516	1.41087e+07	2875.45	Or88a	809	14108635	TRUE	1	ATTTGGAC	1	2907	60.7484	2973.15
ZW142	P-element	3L	+	341577	nan	nan	341577	2898.01	mthl10	198	341586	FALSE	1	GGCGGGCA	1	2907	25.1821	2918.75
ZW177	P-element	2L	-	9.61331e+06	9.61337e+06	-74.2304	9.61324e+06	2960.83	Trx-2	121	9613292	FALSE	5	GGATAGACCGATTGGCA	1	2907	22.5453	2927.34
B54	PROTOP	2L	-	2.29297e+07	2.29299e+07	-105.233	2.29295e+07	283.833	lt	5093	22929887	TRUE	1	GTCAAACA	1	4479	-31.2215	4552.22
I17	PROTOP	3R	+	1.07821e+07	nan	nan	1.07821e+07	4498.5	mRpL37	1970	10782122	TRUE	2	GTAATAGGGTTTAAC	1	4480	-14.4628	4537.94
I26	PROTOP	3R	+	1.07821e+07	1.07821e+07	-27.5614	1.0782e+07	4397.73	mRpL37	1970	10782122	TRUE	1	GTAATAGGGTTTAAC	1	4480	8.02196	4499.23
I34	PROTOP	3L	+	2.3651e+07	2.36505e+07	91.2876	2.36514e+07	4437.57	AGO3	95556	2.36515e+07	TRUE	1	GGCTTTAAC	3	4480	-15.7124	4568.71
B23	S_DM	2L	-	2.21339e+07	2.21339e+07	-57.454	nan	nan	CycK	3717	2.21339e+07	TRUE	4	TACATACAAATATACGCAATAATATATA	1	1736	-97.1444	1711.86
