# Supplementary material for: Double insertion of transposable elements provides a substrate for the evolution of satellite DNA
Source: HighWire-hosted journal article supplement (doi:10.1101/gr.231472.117), 2018-03-27
Supplement: Supplemental_Table_S4.xlsx [file Supplemental_Table_S4.xlsx]

## Sheet: R1
Anchor	Target	Anchor Strand	Target Strand	Anchor Pos	Target Pos	Freq	Mean CN	Type	Significant	q-val	Corr Coef
R1_DM	R1_DM	-	+	2.29712	5383.46	1	155.365	Tandem	TRUE	0	1
R1_DM	Circe_LTR	+	+	1244.2	310.834	1	4.42353	Junction	TRUE	5.01825e-14	0.756327
R1_DM	MICROPIA_I	+	+	2555.45	4606.98	1	1.63529	Junction	TRUE	5.6677e-13	0.736284
R1_DM	Circe_I	+	+	1440.4	7064.74	1	5.76471	Junction	TRUE	8.13002e-11	0.693568
R1_DM	R1_DM	-	+	4542.16	4059.79	1	13.9059	Deletion	TRUE	2.45649e-10	0.681444
R1_DM	R1_DM	-	+	2067.49	1814.84	1	9.61176	Deletion	TRUE	3.14577e-09	0.654555
R1_DM	R1_DM	-	+	236.357	3869.55	0.988235	2.23529	Tandem	TRUE	5.09813e-09	0.647872
R1_DM	STALKER3_LTR	+	+	4813.74	393.164	1	4.37647	Junction	TRUE	6.4656e-09	0.6439
R1_DM	R1_DM	-	+	603.625	5290.22	0.952941	2.82353	Tandem	TRUE	1.17229e-08	0.636106
R1_DM	R1_DM	-	+	-72.799	5127.62	1	42.8235	Tandem	TRUE	2.2489e-08	0.627582
R1_DM	FW	+	+	1395.25	4689.52	1	18.7176	Junction	TRUE	4.18031e-08	0.619281
R1_DM	R1_DM	-	+	4832.92	3652.54	0.988235	7	Deletion	TRUE	7.47235e-08	0.611304
R1_DM	R1_DM	-	+	3292.56	594.125	0.776471	1.11765	Deletion	TRUE	8.26509e-08	0.609104
R1_DM	R1_DM	-	+	33.9178	3443.57	0.8	0.870588	Tandem	TRUE	1.90072e-07	0.597816
R1_DM	Circe_LTR	-	-	2368.36	-82.5789	1	6.38824	Junction	TRUE	3.2914e-07	0.589864
R1_DM	R1_DM	-	+	4947.39	4530.61	1	3.03529	Deletion	TRUE	7.4849e-07	0.578075
R1_DM	R1_DM	-	+	2003.95	1614.57	0.988235	2.51765	Deletion	TRUE	1.2967e-06	0.569677
R1_DM	ACCORD_LTR	-	+	3127.02	556.071	1	2.49412	Junction	TRUE	1.40966e-06	0.567707
R1_DM	ACCORD2_I	-	+	2273.51	1914.55	1	3.30588	Junction	TRUE	1.48847e-06	0.566179
R1_DM	R1_DM	-	+	1250.76	1760.84	0.976471	5.85882	Tandem	TRUE	2.10845e-06	0.560485
R1_DM	R1_DM	-	+	5082.57	4893.21	1	13.8	Deletion	TRUE	2.39696e-06	0.557926
R1_DM	Circe_I	-	-	2149.69	-105.96	1	5.02353	Junction	TRUE	3.10353e-06	0.55347
R1_DM	R1_DM	-	+	5021.66	4369.69	0.188235	0.188235	Deletion	TRUE	5.42609e-06	0.544456
R1_DM	R1_DM	-	+	334.763	4120.19	0.682353	1.32941	Tandem	TRUE	2.38256e-05	0.520464
R1_DM	R1_DM	-	+	1451.51	725.476	0.858824	1.6	Deletion	TRUE	2.50911e-05	0.518944
R1_DM	R1_DM	-	+	138.526	4775.2	0.988235	1.88235	Tandem	TRUE	2.65683e-05	0.516727
R1_DM	ACCORD_LTR	+	-	3148.68	28.0769	1	1.96471	Junction	TRUE	2.65683e-05	0.517002
R1_DM	R1_DM	-	+	3487.68	4652	0.788235	1.18824	Tandem	TRUE	2.88842e-05	0.514731
R1_DM	STALKER3_LTR	-	-	5096.15	-77.5277	0.952941	1.09412	Junction	TRUE	4.90211e-05	0.505173
R1_DM	R1_DM	-	-	547.585	1200.22	0.164706	0.164706	Inversion	TRUE	8.558e-05	0.49439
R1_DM	FW	-	+	1530.73	1782.91	0.188235	0.247059	Junction	TRUE	8.558e-05	0.494251
R1_DM	ACCORD_LTR	+	+	3174.32	508.389	0.764706	0.835294	Junction	TRUE	0.000101364	0.490095
R1_DM	DMRT1B	-	-	2453.62	-104.15	1	1.34118	Junction	TRUE	0.000101364	0.490497
R1_DM	STALKER3_LTR	-	-	4773.25	63.485	0.988235	1.89412	Junction	TRUE	0.000110553	0.487983
R1_DM	R1_DM	-	+	1807.84	1140.53	0.741176	1.18824	Deletion	TRUE	0.000118152	0.486243
R1_DM	R1_DM	-	+	1554.39	358.599	1	2.32941	Deletion	TRUE	0.000159063	0.48024
R1_DM	R1_DM	-	+	406.094	3920.43	0.741176	1.25882	Tandem	TRUE	0.000160197	0.479597
R1_DM	R1_DM	-	-	-114.286	1390.71	0.176471	0.176471	Inversion	TRUE	0.000164263	0.478631
R1_DM	ACCORD2_LTR	-	+	2529.56	318.742	1	7.52941	Junction	TRUE	0.000169954	0.477505
R1_DM	R1_DM	-	+	3414.03	2135.8	0.623529	0.811765	Deletion	TRUE	0.000220909	0.472059
R1_DM	DMRT1B	-	-	4577.32	2388	0.8	2.70588	Junction	TRUE	0.000238303	0.469747
R1_DM	DMRT1B	+	+	4598.89	5181.74	1	2.63529	Junction	TRUE	0.000238303	0.46967
R1_DM	R1_DM	-	+	1212.72	582.721	0.611765	3.52941	Deletion	TRUE	0.000242109	0.468911
R1_DM	Circe_LTR	+	+	690.104	324.954	0.823529	1.09412	Junction	TRUE	0.000311062	0.463588
R1_DM	ACCORD2_LTR	+	-	2309.57	-104.579	1	6.03529	Junction	TRUE	0.000332741	0.461821
R1_DM	R1_DM	-	+	3127.39	2264.49	0.823529	3.81176	Deletion	TRUE	0.000418082	0.456844
R1_DM	FW	-	-	1395.59	-17.3591	1	18.4941	Junction	TRUE	0.000524108	0.451845
R1_DM	R1_DM	-	+	3553.17	3349.12	0.811765	1.50588	Deletion	TRUE	0.000560143	0.450058
R1_DM	TAHRE	-	-	4248.36	2775.96	0.152941	0.152941	Junction	TRUE	0.000670795	0.4455
R1_DM	TAHRE	+	+	5389.58	2755.9	0.152941	0.152941	Junction	TRUE	0.000670795	0.4455
R1_DM	R1_DM	-	+	577.878	4312.99	0.658824	1.48235	Tandem	TRUE	0.000676277	0.444919
R1_DM	R1_DM	-	+	337.017	1616.52	0.0941176	0.0941176	Tandem	TRUE	0.000862442	0.437837
R1_DM	R1_DM	-	+	2371	705.503	0.0941176	0.0941176	Deletion	TRUE	0.000862442	0.437837
R1_DM	R1_DM	-	+	4111.41	283.635	0.0941176	0.0941176	Deletion	TRUE	0.000862442	0.437837
R1_DM	MDG1_I	-	+	2576.68	2341.79	0.0941176	0.0941176	Junction	TRUE	0.000862442	0.437837
R1_DM	DOC	-	+	3703.53	4803.49	0.0941176	0.0941176	Junction	TRUE	0.000862442	0.437837
R1_DM	R1_DM	-	+	-26.4914	4760.04	0.882353	2.14118	Tandem	TRUE	0.00114904	0.43129
R1_DM	R1_DM	-	+	5107.35	321.379	0.211765	0.211765	Deletion	TRUE	0.00117392	0.430447
R1_DM	PROTOP	-	-	2539.87	6.31102	0.870588	2.25882	Junction	TRUE	0.00132676	0.427395
R1_DM	STALKER4_LTR	-	-	3675.83	-13.0079	0.811765	2.48235	Junction	TRUE	0.00144027	0.425214
R1_DM	R1_DM	-	+	4393.48	3348.78	0.929412	2.04706	Deletion	TRUE	0.00163822	0.421982
R1_DM	STALKER3_LTR	-	-	-167.397	-167.542	0.329412	0.329412	Junction	TRUE	0.00222184	0.414724
R1_DM	BLOOD_LTR	-	-	3397.4	-83.88	0.564706	0.576471	Junction	TRUE	0.00261725	0.410585
R1_DM	DOC	+	-	3537.75	809.958	0.0941176	0.117647	Junction	TRUE	0.00264878	0.409942
R1_DM	R1_DM	-	+	1836.53	5375.55	0.105882	0.105882	Tandem	TRUE	0.0029086	0.406261
R1_DM	R1_DM	-	+	3905.58	5477.69	0.105882	0.105882	Tandem	TRUE	0.0029086	0.406261
R1_DM	R1_DM	-	+	-91.2098	4796.61	0.211765	0.282353	Tandem	TRUE	0.0029086	0.405998
R1_DM	GYPSY2_I	-	-	3281.34	1829.44	0.105882	0.105882	Junction	TRUE	0.0029086	0.406261
R1_DM	Circe_I	-	-	5082.68	6671.09	0.105882	0.105882	Junction	TRUE	0.0029086	0.406261
R1_DM	Circe_LTR	-	-	4883.76	-83.3397	0.105882	0.141176	Junction	TRUE	0.00307663	0.404335
R1_DM	R1_DM	-	+	1262.92	5263.61	0.964706	3.56471	Tandem	TRUE	0.00360372	0.400236
R1_DM	PROTOP	+	+	2553.39	4472.18	0.858824	1.88235	Junction	TRUE	0.00398661	0.397471
R1_DM	R1_DM	-	+	4240.24	2254.11	0.105882	0.117647	Deletion	TRUE	0.00410404	0.396435
R1_DM	R1_DM	-	+	3907	588.545	0.647059	0.894118	Deletion	TRUE	0.00411571	0.396036
R1_DM	R2_DM	-	+	-99.8797	3436.63	0.188235	0.2	Junction	TRUE	0.00430578	0.394612
R1_DM	DOC	-	+	3443.12	4601.86	0.0705882	0.0705882	Junction	TRUE	0.00541008	0.388669
R1_DM	ACCORD_LTR	-	-	3125.48	9.10489	0.941176	1.14118	Junction	TRUE	0.00567315	0.387161
R1_DM	R1_DM	-	+	3764.07	1930.15	0.105882	0.105882	Deletion	TRUE	0.00676368	0.382416
R1_DM	FW	-	-	3377.88	4045.66	0.635294	0.647059	Junction	TRUE	0.00690766	0.381558
R1_DM	R1_DM	-	+	2598.73	4878.17	0.0941176	0.0941176	Tandem	TRUE	0.0069805	0.380972
R1_DM	R1_DM	-	+	3873.78	1856.6	0.105882	0.105882	Deletion	TRUE	0.00873625	0.374886
R1_DM	R1_DM	-	+	437.725	5426.89	0.494118	0.705882	Tandem	TRUE	0.00893864	0.373972
R1_DM	R1_DM	-	+	2413.97	2088.96	0.6	3.75294	Deletion	TRUE	0.00950034	0.369493
R1_DM	R1_DM	-	+	-165.796	412.834	0.164706	0.164706	Tandem	TRUE	0.00950034	0.369464
R1_DM	R1_DM	-	+	614.201	1871.8	0.0705882	0.0705882	Tandem	TRUE	0.00950034	0.369071
R1_DM	BEL_LTR	-	-	4438.17	13.1821	0.0705882	0.0705882	Junction	TRUE	0.00950034	0.369071
R1_DM	BEL_LTR	+	+	4305.02	447.471	0.0705882	0.0705882	Junction	TRUE	0.00950034	0.369071
R1_DM	BEL_LTR	+	+	4526.49	288.51	0.0705882	0.0705882	Junction	TRUE	0.00950034	0.369071
R1_DM	ROO_LTR	-	+	-27.3513	435.456	0.0705882	0.0705882	Junction	TRUE	0.00950034	0.369071
R1_DM	ROO_LTR	+	-	5494.28	134.756	0.0705882	0.0705882	Junction	TRUE	0.00950034	0.369071
R1_DM	ROO_LTR	+	-	5099.64	-77.068	0.0705882	0.0705882	Junction	TRUE	0.00950034	0.369071
R1_DM	BATUMI_I	-	+	4156.74	6550.2	0.0705882	0.0705882	Junction	TRUE	0.00950034	0.369071
R1_DM	BATUMI_I	-	-	4362.06	6979.98	0.0705882	0.0705882	Junction	TRUE	0.00950034	0.369071
R1_DM	MICROPIA_I	-	-	4095.81	2164.43	0.117647	0.117647	Junction	FALSE	0.0963636	-0.280024
R1_DM	MICROPIA_I	+	+	1998.68	3741.15	0.117647	0.117647	Junction	FALSE	0.14398	-0.253658
R1_DM	MICROPIA_I	+	+	2119.72	4521.07	0.0823529	0.0823529	Junction	FALSE	0.0408896	-0.316824
R1_DM	MICROPIA_I	+	+	2246.6	1287.05	0.705882	0.964706	Junction	FALSE	0.255027	0.213717
R1_DM	MICROPIA_I	+	+	2052.23	4519.87	0.211765	0.270588	Junction	FALSE	0.115216	-0.266518
R1_DM	MICROPIA_I	+	+	2379.89	4221.35	0.141176	0.152941	Junction	FALSE	0.420974	-0.160615
R1_DM	MICROPIA_I	+	+	1188.99	2730.96	0.0470588	0.0588235	Junction	FALSE	0.341429	0.184461
R1_DM	R1_DM	-	+	5086.92	4005.81	0.541176	0.541176	Deletion	FALSE	0.10136	0.277593
R1_DM	R1_DM	-	+	1334.32	5513.09	0.694118	0.694118	Tandem	FALSE	0.207012	0.230859
R1_DM	R1_DM	-	+	3172.03	1789.71	0.352941	0.423529	Deletion	FALSE	0.900422	0.0272901
R1_DM	R1_DM	-	+	-38.9778	1313.78	0.270588	0.270588	Tandem	FALSE	0.294108	-0.204593
R1_DM	R1_DM	-	+	2032.47	693.267	0.835294	1.50588	Deletion	FALSE	0.123299	0.262361
R1_DM	R1_DM	-	+	-72.5915	4240.23	0.364706	0.423529	Tandem	FALSE	0.147396	0.25221
R1_DM	R1_DM	-	+	3632.44	2961.77	0.0941176	0.0941176	Deletion	FALSE	0.307181	-0.196935
R1_DM	R1_DM	-	+	213.38	5294.77	1	5.78824	Tandem	FALSE	0.11684	0.265338
R1_DM	R1_DM	-	+	3324.78	3073.17	0.211765	0.247059	Deletion	FALSE	0.980691	-0.00923537
R1_DM	R1_DM	-	+	1493.91	1148.16	0.952941	1.08235	Deletion	FALSE	0.262485	0.211332
R1_DM	R1_DM	-	+	4799.02	5355.79	0.8	2.09412	Tandem	FALSE	0.229744	-0.222537
R1_DM	R1_DM	-	+	1475.12	5423.37	0.188235	0.235294	Tandem	FALSE	0.813209	-0.0518505
R1_DM	R1_DM	-	+	823.105	528.857	0.411765	1.25882	Deletion	FALSE	0.621405	-0.101882
R1_DM	R1_DM	-	+	2205.13	2043.92	0.341176	0.858824	Deletion	FALSE	0.662809	-0.0901972
R1_DM	R1_DM	-	+	3569.72	2765.6	0.435294	0.494118	Deletion	FALSE	0.817568	-0.0481622
R1_DM	R1_DM	-	+	3930.5	4345.77	0.176471	0.188235	Tandem	FALSE	0.885267	0.0341753
R1_DM	R1_DM	-	+	3406.68	3015.67	0.929412	2.23529	Deletion	FALSE	0.0124189	0.360764
R1_DM	R1_DM	-	+	4399.88	4287.36	0.858824	19.1059	Deletion	FALSE	0.0735675	0.292854
R1_DM	R1_DM	-	+	4455.51	2206.03	0.905882	1.24706	Deletion	FALSE	0.0655363	0.2972
R1_DM	R1_DM	-	+	4068.86	3263.35	0.152941	0.152941	Deletion	FALSE	0.864879	-0.0394168
R1_DM	R1_DM	-	+	4955.04	3938.94	0.223529	0.223529	Deletion	FALSE	0.234107	-0.219602
R1_DM	R1_DM	-	+	4720.9	1069.63	0.247059	0.270588	Deletion	FALSE	0.0647454	-0.297878
R1_DM	R1_DM	-	+	4950.55	4602	0.305882	0.458824	Deletion	FALSE	0.179216	0.242558
R1_DM	R1_DM	-	+	1771.4	1028.72	0.505882	0.635294	Deletion	FALSE	0.992824	-0.00145098
R1_DM	R1_DM	-	+	-92.9057	4891.48	0.211765	0.247059	Tandem	FALSE	0.980506	0.00940737
R1_DM	R1_DM	-	+	637.681	5480.44	0.588235	0.635294	Tandem	FALSE	0.0330017	-0.325863
R1_DM	R1_DM	-	+	1432.1	629.165	0.494118	1.64706	Deletion	FALSE	0.328822	0.190625
R1_DM	R1_DM	-	+	1607.75	5427.07	0.270588	0.352941	Tandem	FALSE	0.426165	-0.156108
R1_DM	R1_DM	-	+	4791.54	3881.56	0.6	0.611765	Deletion	FALSE	0.112545	0.267573
R1_DM	R1_DM	-	+	1024.98	5135.83	0.317647	0.329412	Tandem	FALSE	0.794085	0.0552881
R1_DM	R1_DM	-	+	2205.14	5366.1	0.0470588	0.0823529	Tandem	FALSE	0.318417	0.193367
R1_DM	R1_DM	-	+	3508.11	2981.62	0.835294	2.25882	Deletion	FALSE	0.0334208	0.325231
R1_DM	R1_DM	-	+	3970.7	3218.93	0.988235	1.98824	Deletion	FALSE	0.834118	0.045562
R1_DM	R1_DM	-	+	1084.37	399.382	1	5.47059	Deletion	FALSE	0.341429	0.182014
R1_DM	R1_DM	-	+	3443	2708.01	0.952941	2.90588	Deletion	FALSE	0.474952	0.145202
R1_DM	R1_DM	-	+	3990.11	3622.8	0.647059	8.75294	Deletion	FALSE	0.825528	0.0470726
R1_DM	R1_DM	-	+	1882.43	1430.69	0.694118	0.882353	Deletion	FALSE	0.287897	0.205992
R1_DM	R1_DM	-	+	3521.9	4816.69	0.0235294	0.0235294	Tandem	FALSE	0.233932	0.219773
R1_DM	R1_DM	-	+	3192.61	2509.79	0.835294	0.917647	Deletion	FALSE	0.538097	0.126476
R1_DM	R1_DM	-	+	814.635	332.131	0.811765	3.10588	Deletion	FALSE	0.641012	0.0941059
R1_DM	R1_DM	-	+	1988.5	1176.36	0.294118	0.305882	Deletion	FALSE	0.28653	0.206347
R1_DM	R1_DM	-	+	1982.44	821.283	0.588235	0.658824	Deletion	FALSE	0.467399	0.147819
R1_DM	R1_DM	-	+	837.307	476.877	0.976471	12.6706	Deletion	FALSE	0.0248003	0.33642
R1_DM	R1_DM	-	+	4901.6	3151.23	0.0117647	0.0117647	Deletion	FALSE	0.963891	0.0130187
R1_DM	R1_DM	-	+	3255.78	3119.47	0.729412	5.12941	Deletion	FALSE	0.49045	-0.140525
R1_DM	R1_DM	-	+	3916.62	2770.06	0.0823529	0.0823529	Deletion	FALSE	0.0566737	0.305438
R1_DM	R1_DM	-	+	2753.56	2455.54	0.623529	2.21176	Deletion	FALSE	0.108345	0.271633
R1_DM	R1_DM	-	+	4147.95	3796.11	0.529412	2.98824	Deletion	FALSE	0.255149	0.213518
R1_DM	R1_DM	-	+	2606.12	1088.74	0.847059	1.08235	Deletion	FALSE	0.550488	0.124556
R1_DM	R1_DM	-	+	4257.29	3597.99	0.811765	0.858824	Deletion	FALSE	0.921997	-0.0218235
R1_DM	R1_DM	-	+	3706.93	2354.51	0.835294	0.882353	Deletion	FALSE	0.5868	0.112528
R1_DM	R1_DM	-	+	1836.12	360.228	0.964706	1.32941	Deletion	FALSE	0.825627	0.04696
R1_DM	R1_DM	-	+	4112.18	3951.84	0.152941	0.164706	Deletion	FALSE	0.704315	0.0807089
R1_DM	R1_DM	-	+	4253.45	3995.03	0.294118	0.458824	Deletion	FALSE	0.653116	0.0917703
R1_DM	R1_DM	-	+	940.832	1970.69	0.705882	0.917647	Tandem	FALSE	0.0212406	0.34249
R1_DM	R1_DM	-	+	-28.2231	4531.43	1	1.23529	Tandem	FALSE	0.0601415	0.301959
R1_DM	R1_DM	-	+	-53.6351	2376.08	0.635294	0.635294	Tandem	FALSE	0.61711	-0.10324
R1_DM	R1_DM	-	+	3139.36	2563.06	0.294118	0.341176	Deletion	FALSE	0.177332	-0.243825
R1_DM	R1_DM	-	+	-145.867	5506.05	0.223529	0.235294	Tandem	FALSE	0.255027	0.213765
R1_DM	R1_DM	-	+	2744.67	2145.59	0.823529	1.22353	Deletion	FALSE	0.123554	0.262107
R1_DM	R1_DM	-	+	3176.42	1291.09	0.835294	0.952941	Deletion	FALSE	0.22584	0.223755
R1_DM	R1_DM	-	+	559.563	4866.05	0.776471	0.870588	Tandem	FALSE	0.293298	0.204855
R1_DM	R1_DM	-	+	2833.91	4593.22	0.576471	0.717647	Tandem	FALSE	0.662809	0.0902429
R1_DM	R1_DM	-	+	1434.69	1326.75	0.870588	9.45882	Deletion	FALSE	0.474952	0.144908
R1_DM	R1_DM	-	+	1446.16	1197.53	0.788235	0.811765	Deletion	FALSE	0.591247	-0.111565
R1_DM	R1_DM	-	+	2657.86	2424.61	0.2	0.494118	Deletion	FALSE	0.724497	0.0716095
R1_DM	R1_DM	-	+	1298.69	720.19	0.129412	0.141176	Deletion	FALSE	0.188644	-0.237856
R1_DM	R1_DM	-	+	1019.23	465.067	0.329412	0.929412	Deletion	FALSE	0.0935989	0.282115
R1_DM	R1_DM	-	+	1269.8	3036	0.0588235	0.0588235	Tandem	FALSE	0.183792	0.239891
R1_DM	R1_DM	-	+	4689.91	5370.44	0.152941	0.188235	Tandem	FALSE	0.864879	-0.0390808
R1_DM	R1_DM	-	+	731.473	325.338	0.4	0.8	Deletion	FALSE	0.69447	0.0828223
R1_DM	R1_DM	-	+	-36.8875	4886.14	0.164706	0.164706	Tandem	FALSE	0.57162	-0.120872
R1_DM	R1_DM	-	+	4110.75	2986.58	0.0588235	0.0705882	Deletion	FALSE	0.307181	0.197642
R1_DM	R1_DM	-	+	272.015	2030.09	0.0588235	0.0588235	Tandem	FALSE	0.0227335	0.339998
R1_DM	R1_DM	-	+	1231.58	5476.44	0.576471	0.576471	Tandem	FALSE	0.685015	-0.08508
R1_DM	R1_DM	-	+	1047.99	2153.87	0.305882	0.305882	Tandem	FALSE	0.427463	-0.155438
R1_DM	R1_DM	-	+	904.144	693.272	0.435294	1.28235	Deletion	FALSE	0.591678	0.111269
R1_DM	R1_DM	-	+	3850.13	3707.39	0.0705882	0.0705882	Deletion	FALSE	0.982129	0.00876163
R1_DM	R1_DM	-	+	3730.14	3494.76	0.458824	0.894118	Deletion	FALSE	0.426165	0.157495
R1_DM	R1_DM	-	+	3702.48	994.947	0.717647	1.27059	Deletion	FALSE	0.537373	-0.12674
R1_DM	R1_DM	-	+	1071.9	877.119	0.129412	0.2	Deletion	FALSE	0.585194	-0.114642
R1_DM	R1_DM	-	+	2101.44	4411.44	0.129412	0.129412	Tandem	FALSE	0.990742	0.00458812
R1_DM	R1_DM	-	+	3025.14	2255.98	0.129412	0.164706	Deletion	FALSE	0.474952	0.144634
R1_DM	R1_DM	-	+	789.387	554.313	0.682353	3.61176	Deletion	FALSE	0.0987301	0.278742
R1_DM	R1_DM	-	+	5036.17	4215.67	0.894118	0.952941	Deletion	FALSE	0.916228	-0.0237622
R1_DM	R1_DM	-	+	3949.29	3695.88	0.552941	1.90588	Deletion	FALSE	0.986482	0.00547639
R1_DM	R1_DM	-	+	2537.44	2326.72	0.141176	0.2	Deletion	FALSE	0.908777	0.0249373
R1_DM	R1_DM	-	+	1160.12	4582.51	0.0235294	0.0235294	Tandem	FALSE	0.727237	-0.0706404
R1_DM	R1_DM	-	+	605.742	5034.11	0.682353	0.776471	Tandem	FALSE	0.183792	0.240693
R1_DM	R1_DM	-	+	1906.68	973.272	0.588235	0.623529	Deletion	FALSE	0.576326	0.117171
R1_DM	R1_DM	-	+	1476.28	3260.65	0.176471	0.188235	Tandem	FALSE	0.307181	-0.196635
R1_DM	R1_DM	-	+	1574.41	559.878	0.752941	0.964706	Deletion	FALSE	0.294873	-0.204076
R1_DM	R1_DM	-	+	4837.76	4701.36	0.0941176	0.2	Deletion	FALSE	0.211	0.228699
R1_DM	R1_DM	-	+	554.85	5473.13	0.988235	3.23529	Tandem	FALSE	0.98536	0.00702218
R1_DM	R1_DM	-	+	4146.68	3892.28	0.517647	1.31765	Deletion	FALSE	0.755009	-0.0645191
R1_DM	R1_DM	-	+	3932.17	3281.06	0.188235	0.188235	Deletion	FALSE	0.593037	0.1108
R1_DM	R1_DM	-	+	1110.47	4049.62	0.0235294	0.0235294	Tandem	FALSE	0.574736	0.120421
R1_DM	R1_DM	-	+	3397.44	4323.23	0.2	0.411765	Tandem	FALSE	0.203092	-0.232431
R1_DM	R1_DM	-	+	2908.11	2770.03	0.176471	0.435294	Deletion	FALSE	0.341429	0.182002
R1_DM	R1_DM	-	+	1085.61	684.655	0.811765	4.51765	Deletion	FALSE	0.336147	0.187565
R1_DM	R1_DM	-	+	1592.53	3446.94	0.0235294	0.0235294	Tandem	FALSE	0.526457	0.133159
R1_DM	R1_DM	-	+	4547.14	4315.97	0.458824	0.564706	Deletion	FALSE	0.61711	-0.103829
R1_DM	R1_DM	-	+	1152.27	646.581	0.929412	11.2706	Deletion	FALSE	0.264274	0.210888
R1_DM	R1_DM	-	+	1346.37	2799.62	0.0470588	0.0470588	Tandem	FALSE	0.307181	0.196096
R1_DM	R1_DM	-	+	3560.82	371.353	0.388235	0.423529	Deletion	FALSE	0.639045	-0.0957613
R1_DM	R1_DM	-	+	-87.6866	1434.43	0.411765	0.411765	Tandem	FALSE	0.717681	0.075506
R1_DM	R1_DM	-	+	2587.42	2277.33	0.647059	3.85882	Deletion	FALSE	0.0413133	0.316032
R1_DM	R1_DM	-	+	786.217	4838.49	0.247059	0.294118	Tandem	FALSE	0.258692	-0.21238
R1_DM	R1_DM	-	+	555.62	353.622	0.364706	0.494118	Deletion	FALSE	0.779444	-0.0583426
R1_DM	R1_DM	-	+	242.106	1716.58	0.988235	1.63529	Tandem	FALSE	0.576326	-0.11842
R1_DM	R1_DM	-	+	1718.27	357.444	0.517647	0.517647	Deletion	FALSE	0.955232	0.015419
R1_DM	R1_DM	-	+	1194.07	3057.89	0.0941176	0.105882	Tandem	FALSE	0.287934	-0.205853
R1_DM	R1_DM	-	+	3905.1	1602.28	0.117647	0.117647	Deletion	FALSE	0.0933546	-0.282421
R1_DM	R1_DM	-	+	1548.59	725.474	0.588235	1.34118	Deletion	FALSE	0.307181	-0.196596
R1_DM	R1_DM	-	+	4417.69	3266.83	0.258824	0.258824	Deletion	FALSE	0.551679	-0.12433
R1_DM	R1_DM	-	+	2737.73	537.158	0.0117647	0.0235294	Deletion	FALSE	0.610675	-0.10516
R1_DM	R1_DM	-	+	2086.09	5308.33	0.0352941	0.0352941	Tandem	FALSE	0.610675	-0.106923
R1_DM	R1_DM	-	+	1271.11	859.393	0.176471	0.188235	Deletion	FALSE	0.983102	-0.00812461
R1_DM	R1_DM	-	+	2054.15	1896.79	0.0588235	0.105882	Deletion	FALSE	0.982129	-0.0086168
R1_DM	R1_DM	-	+	4233.92	3365.5	0.647059	0.647059	Deletion	FALSE	0.596571	-0.109131
R1_DM	R1_DM	-	+	1415.36	1909.06	0.0705882	0.117647	Tandem	FALSE	0.900422	-0.0289426
R1_DM	R1_DM	-	+	-94.7712	5207.57	0.2	0.411765	Tandem	FALSE	0.526457	-0.131201
R1_DM	R1_DM	-	+	2936.72	2736.93	0.0823529	0.0941176	Deletion	FALSE	0.41553	0.161657
R1_DM	R1_DM	-	+	630.071	495.619	0.388235	2.35294	Deletion	FALSE	0.0339749	0.324484
R1_DM	R1_DM	-	+	-116.641	1144.12	0.0470588	0.0470588	Tandem	FALSE	0.426165	0.15598
R1_DM	R1_DM	-	+	1407.09	995.07	0.0588235	0.0588235	Deletion	FALSE	0.232668	0.221839
R1_DM	R1_DM	-	+	1224.07	421.042	0.752941	1.08235	Deletion	FALSE	0.340865	0.186513
R1_DM	R1_DM	-	+	2769.67	2632.56	0.117647	0.152941	Deletion	FALSE	0.992824	-0.00142164
R1_DM	R1_DM	-	+	1815.27	1267.39	0.0588235	0.0588235	Deletion	FALSE	0.895854	-0.0325325
R1_DM	R1_DM	-	+	4414.02	4060.22	0.235294	0.282353	Deletion	FALSE	0.530671	0.129126
R1_DM	R1_DM	-	+	1185.54	930.869	0.729412	0.929412	Deletion	FALSE	0.341429	0.185616
R1_DM	R1_DM	-	+	4167.07	3667.64	0.270588	0.270588	Deletion	FALSE	0.341429	0.180451
R1_DM	R1_DM	-	+	1846.79	4240.19	0.188235	0.2	Tandem	FALSE	0.685506	-0.0849074
R1_DM	R1_DM	-	+	3679.98	269.515	0.0117647	0.0117647	Deletion	FALSE	0.635294	-0.0979981
R1_DM	R1_DM	-	+	2132.43	2577.15	0.247059	0.529412	Tandem	FALSE	0.341429	-0.180335
R1_DM	R1_DM	-	+	4104.85	2264.48	0.105882	0.117647	Deletion	FALSE	0.867156	0.0371737
R1_DM	R1_DM	-	+	4261.31	5404.84	0.0117647	0.0117647	Tandem	FALSE	0.916813	-0.0227932
R1_DM	R1_DM	-	+	4537.35	4191.49	0.623529	0.8	Deletion	FALSE	0.635294	0.098144
R1_DM	R1_DM	-	+	4981.11	3447.35	0.0823529	0.0823529	Deletion	FALSE	0.14398	0.253466
R1_DM	R1_DM	-	+	4545.47	3491.42	0.0823529	0.0823529	Deletion	FALSE	0.967213	0.0118652
R1_DM	R1_DM	-	+	5039.04	4738.64	0.952941	1.65882	Deletion	FALSE	0.307181	0.197089
R1_DM	R1_DM	-	+	4654.08	5067.75	0.0352941	0.0352941	Tandem	FALSE	0.814448	0.0500269
R1_DM	R1_DM	-	+	4553.67	4389.2	0.447059	1.45882	Deletion	FALSE	0.0185727	0.347941
R1_DM	R1_DM	-	+	3679.39	5365.06	0.0588235	0.0588235	Tandem	FALSE	0.984085	-0.00791592
R1_DM	R1_DM	-	+	1587.5	686.685	0.529412	0.741176	Deletion	FALSE	0.674929	0.0869686
R1_DM	R1_DM	-	+	-92.287	5451.13	0.823529	1.47059	Tandem	FALSE	0.556373	-0.123303
R1_DM	R1_DM	-	+	2370.72	1121.94	0.105882	0.105882	Deletion	FALSE	0.280769	-0.207427
R1_DM	R1_DM	-	+	4272.35	3159.46	0.929412	1.21176	Deletion	FALSE	0.814448	0.0503911
R1_DM	R1_DM	-	+	1972.25	1267.99	0.152941	0.152941	Deletion	FALSE	0.102098	-0.276511
R1_DM	R1_DM	-	+	1668.46	1487.04	0.0705882	0.0823529	Deletion	FALSE	0.61711	-0.103714
R1_DM	R1_DM	-	+	237.968	4950.92	0.388235	0.411765	Tandem	FALSE	0.0240283	0.337605
R1_DM	R1_DM	-	+	1124.25	1021.12	0.141176	1.83529	Deletion	FALSE	0.653116	0.0919151
R1_DM	R1_DM	-	+	-121.425	4817.45	0.564706	0.635294	Tandem	FALSE	0.0408896	0.31764
R1_DM	R1_DM	-	+	181.101	4060.73	0.423529	0.435294	Tandem	FALSE	0.0645404	0.298735
R1_DM	R1_DM	-	+	4989.64	732.562	0.0117647	0.0117647	Deletion	FALSE	0.814448	0.0488305
R1_DM	R1_DM	-	+	4524.3	449.088	0.0588235	0.0588235	Deletion	FALSE	0.895854	0.0298295
R1_DM	R1_DM	-	+	228.905	5498.49	0.364706	0.411765	Tandem	FALSE	0.895854	0.0307848
R1_DM	R1_DM	-	+	1587.26	4176.99	0.329412	0.447059	Tandem	FALSE	0.0595747	0.303048
R1_DM	R1_DM	-	+	1359.5	1182.04	0.364706	0.470588	Deletion	FALSE	0.795828	0.0545983
R1_DM	R1_DM	-	+	1644.25	3170.25	0.0117647	0.0117647	Tandem	FALSE	0.717681	-0.0765109
R1_DM	R1_DM	-	+	2317	1632.41	0.235294	0.247059	Deletion	FALSE	0.526457	0.133566
R1_DM	R1_DM	-	+	664.289	408.283	0.305882	0.670588	Deletion	FALSE	0.855585	-0.0414162
R1_DM	R1_DM	-	+	173.886	5099.15	0.2	0.211765	Tandem	FALSE	0.341429	-0.180119
R1_DM	R1_DM	-	+	605.011	2546.13	0.0235294	0.0235294	Tandem	FALSE	0.258692	0.212131
R1_DM	R1_DM	-	+	4628.02	3977.72	0.0705882	0.0823529	Deletion	FALSE	0.021226	0.342775
R1_DM	R1_DM	-	+	3558.25	2562.44	0.0588235	0.0588235	Deletion	FALSE	0.355475	0.175888
R1_DM	R1_DM	-	+	4802.58	4243.47	0.0705882	0.0705882	Deletion	FALSE	0.532836	-0.128427
R1_DM	R1_DM	-	+	4978.32	2932.02	0.0117647	0.0117647	Deletion	FALSE	0.838695	-0.0442803
R1_DM	R1_DM	-	+	3923.59	3533.03	0.447059	3.52941	Deletion	FALSE	0.341429	0.182709
R1_DM	R1_DM	-	+	29.706	5334.92	0.117647	0.494118	Tandem	FALSE	0.58488	0.114759
R1_DM	R1_DM	-	+	4748.86	1496.1	0.0470588	0.0470588	Deletion	FALSE	0.0319073	0.327384
R1_DM	R1_DM	-	+	102.992	3826.11	0.0588235	0.0588235	Tandem	FALSE	0.591678	-0.111306
R1_DM	R1_DM	-	+	2061.1	4728.85	0.0705882	0.0823529	Tandem	FALSE	0.507822	0.136703
R1_DM	R1_DM	-	+	446.334	1981.55	0.0588235	0.0588235	Tandem	FALSE	0.840229	-0.0440202
R1_DM	R1_DM	-	+	3124.7	2986.3	0.152941	0.635294	Deletion	FALSE	0.98536	-0.00725958
R1_DM	R1_DM	-	+	4531.73	2723.02	0.0235294	0.0588235	Deletion	FALSE	0.924774	-0.0207974
R1_DM	R1_DM	-	+	1060.35	3571.09	0.0470588	0.0823529	Tandem	FALSE	0.0866889	0.286324
R1_DM	R1_DM	-	+	3862.38	4821.64	0.152941	0.152941	Tandem	FALSE	0.311316	-0.194976
R1_DM	R1_DM	-	+	4196.79	4611.6	0.364706	0.376471	Tandem	FALSE	0.852589	0.0420404
R1_DM	R1_DM	-	+	460.688	2666.31	0.0117647	0.0117647	Tandem	FALSE	0.727991	-0.0693486
R1_DM	R1_DM	-	+	2428.89	1866.37	0.0941176	0.0941176	Deletion	FALSE	0.416369	0.161447
R1_DM	R1_DM	-	+	4946.31	2222.19	0.0117647	0.0117647	Deletion	FALSE	0.483406	0.141941
R1_DM	R1_DM	-	+	3680.67	3136.43	0.176471	0.211765	Deletion	FALSE	0.858973	-0.0408564
R1_DM	R1_DM	-	+	-73.9459	4601.04	0.164706	0.211765	Tandem	FALSE	0.5868	-0.113092
R1_DM	R1_DM	-	+	2970.78	1228.56	0.0117647	0.0117647	Deletion	FALSE	0.992824	0.00227511
R1_DM	R1_DM	-	+	3816	360.208	0.0235294	0.0235294	Deletion	FALSE	0.442419	-0.15216
R1_DM	R1_DM	-	+	2249.19	3296.73	0.0235294	0.0235294	Tandem	FALSE	0.420974	0.158634
R1_DM	R1_DM	-	+	274.803	3774.99	0.0470588	0.0470588	Tandem	FALSE	0.924601	-0.0208946
R1_DM	R1_DM	-	+	1254.38	2183.14	0.2	0.2	Tandem	FALSE	0.47244	0.146541
R1_DM	R1_DM	-	+	3212.88	5371.44	0.0705882	0.141176	Tandem	FALSE	0.951457	0.0162141
R1_DM	R1_DM	-	+	908.166	356.214	0.270588	0.588235	Deletion	FALSE	0.341429	-0.180758
R1_DM	R1_DM	-	+	2558.93	1531.45	0.0470588	0.0470588	Deletion	FALSE	0.0260833	0.334678
R1_DM	R1_DM	-	+	3478.95	5436.22	0.0235294	0.0235294	Tandem	FALSE	0.335891	-0.187825
R1_DM	R1_DM	-	+	4758.78	4255.35	0.0235294	0.0705882	Deletion	FALSE	0.779444	0.0582946
R1_DM	R1_DM	-	+	1852.3	1651.15	0.717647	2.05882	Deletion	FALSE	0.0839237	0.28767
R1_DM	R1_DM	-	+	263.553	5280.08	0.352941	0.6	Tandem	FALSE	0.825528	0.047044
R1_DM	R1_DM	-	+	5096.95	4375.13	0.176471	0.176471	Deletion	FALSE	0.181763	-0.24155
R1_DM	R1_DM	-	+	2244.74	2661.34	0.0352941	0.0352941	Tandem	FALSE	0.529223	0.129548
R1_DM	R1_DM	-	+	853.111	5393.51	0.235294	0.423529	Tandem	FALSE	0.814448	0.0514504
R1_DM	R1_DM	-	+	1727.74	2259.37	0.0705882	0.0705882	Tandem	FALSE	0.210902	0.228867
R1_DM	R1_DM	-	+	5119.44	1070.66	0.0588235	0.0588235	Deletion	FALSE	0.61711	-0.1031
R1_DM	R1_DM	-	+	4274.71	1474.99	0.0235294	0.0235294	Deletion	FALSE	0.923975	0.0210692
R1_DM	R1_DM	-	+	3706.17	2142.56	0.0235294	0.0470588	Deletion	FALSE	0.22584	0.224868
R1_DM	R1_DM	-	+	1513.54	1043.25	0.117647	0.129412	Deletion	FALSE	0.371497	-0.17161
R1_DM	R1_DM	-	+	1605.44	950.72	0.0705882	0.0705882	Deletion	FALSE	0.727991	-0.0696319
R1_DM	R1_DM	-	+	2448.31	5484.85	0.0470588	0.0470588	Tandem	FALSE	0.119997	0.263564
R1_DM	R1_DM	-	+	4031.59	2801.46	0.141176	0.141176	Deletion	FALSE	0.233932	-0.219991
R1_DM	R1_DM	-	+	-119.011	3249.66	0.0235294	0.0235294	Tandem	FALSE	0.420974	-0.159802
R1_DM	R1_DM	-	+	4382.8	4211.95	0.105882	0.376471	Deletion	FALSE	0.75906	0.0636992
R1_DM	R1_DM	-	+	3020.92	3426.91	0.0352941	0.0352941	Tandem	FALSE	0.618188	0.102343
R1_DM	R1_DM	-	+	1724.95	750.346	0.152941	0.211765	Deletion	FALSE	0.532836	-0.127701
R1_DM	R1_DM	-	+	2410.91	2281.56	0.0352941	0.0470588	Deletion	FALSE	0.717681	0.0775894
R1_DM	R1_DM	-	+	1341.12	842.398	0.0941176	0.223529	Deletion	FALSE	0.318417	0.193276
R1_DM	R1_DM	-	+	2876.27	2336.26	0.129412	0.129412	Deletion	FALSE	0.980691	0.00918978
R1_DM	R1_DM	-	+	4428.31	1239.49	0.0117647	0.0117647	Deletion	FALSE	0.526457	0.131198
R1_DM	R1_DM	-	+	4044.59	5413.14	0.0823529	0.0823529	Tandem	FALSE	0.678604	0.086312
R1_DM	R1_DM	-	+	719.87	5360.05	0.164706	0.258824	Tandem	FALSE	0.403866	-0.164314
R1_DM	R1_DM	-	+	2303.92	1970.24	0.4	0.976471	Deletion	FALSE	0.371497	0.170726
R1_DM	R1_DM	-	+	1204.7	1611.61	0.0470588	0.0470588	Tandem	FALSE	0.895854	-0.0300118
R1_DM	R1_DM	-	+	3519.9	2349.18	0.0235294	0.0235294	Deletion	FALSE	0.992824	0.00323681
R1_DM	R1_DM	-	+	5099.57	3738.72	0.117647	0.117647	Deletion	FALSE	0.864879	-0.0391273
R1_DM	R1_DM	-	+	2770.82	4246.18	0.0470588	0.0588235	Tandem	FALSE	0.921997	-0.0217537
R1_DM	R1_DM	-	+	3653.84	4895.5	0.0117647	0.0117647	Tandem	FALSE	0.814448	0.0488305
R1_DM	R1_DM	-	+	3929.92	4625.08	0.0117647	0.0117647	Tandem	FALSE	0.341429	0.181334
R1_DM	R1_DM	-	+	2682.78	1605.02	0.105882	0.117647	Deletion	FALSE	0.0434679	0.314195
R1_DM	R1_DM	-	+	2551.84	1166.95	0.0352941	0.0470588	Deletion	FALSE	0.447291	0.151426
R1_DM	R1_DM	-	+	120.156	639.816	0.0470588	0.129412	Tandem	FALSE	0.307181	0.197685
R1_DM	R1_DM	-	+	3664.29	581.188	0.0235294	0.0588235	Deletion	FALSE	0.593037	0.109901
R1_DM	R1_DM	-	+	-6.06067	4419.39	0.0117647	0.0117647	Tandem	FALSE	0.900422	-0.0263744
R1_DM	R1_DM	-	+	8.72483	3035.53	0.0235294	0.0235294	Tandem	FALSE	0.576326	-0.116495
R1_DM	R1_DM	-	+	3519.46	4895.92	0.0235294	0.0235294	Tandem	FALSE	0.775406	0.0592816
R1_DM	R1_DM	-	+	4554.23	3723.23	0.0117647	0.0117647	Deletion	FALSE	0.895854	-0.0299556
R1_DM	R1_DM	-	+	3943.05	2590.99	0.0941176	0.0941176	Deletion	FALSE	0.980691	-0.00914817
R1_DM	R1_DM	-	+	318.573	1298.43	0.0117647	0.0117647	Tandem	FALSE	0.5868	0.113292
R1_DM	R1_DM	-	+	595.176	4085.09	0.129412	0.129412	Tandem	FALSE	0.639045	0.0966212
R1_DM	R1_DM	-	+	522.644	412.635	0.352941	2.94118	Deletion	FALSE	0.108345	0.273007
R1_DM	R1_DM	-	+	963.463	462.902	0.235294	2.18824	Deletion	FALSE	0.405843	0.163364
R1_DM	R1_DM	-	+	853.968	691.177	0.141176	0.223529	Deletion	FALSE	0.552169	-0.124106
R1_DM	R1_DM	-	+	3920.34	5397.88	0.0117647	0.0117647	Tandem	FALSE	0.814448	0.0488305
R1_DM	R1_DM	-	+	557.946	1621.05	0.0235294	0.0235294	Tandem	FALSE	0.488955	0.140801
R1_DM	R1_DM	-	+	3739.26	3242.37	0.0470588	0.0588235	Deletion	FALSE	0.867156	0.0373613
R1_DM	R1_DM	-	+	1337.73	725.353	0.2	0.317647	Deletion	FALSE	0.727991	-0.0699353
R1_DM	R1_DM	-	+	2980.98	5313.32	0.0470588	0.0470588	Tandem	FALSE	0.29761	-0.20324
R1_DM	R1_DM	-	+	2385.62	4192.58	0.0235294	0.0235294	Tandem	FALSE	0.526457	0.133159
R1_DM	R1_DM	-	+	4334.49	2639.18	0.0117647	0.0117647	Deletion	FALSE	0.371497	0.170591
R1_DM	R1_DM	-	+	2184.11	4934.06	0.0117647	0.0117647	Tandem	FALSE	0.916813	-0.0227932
R1_DM	R1_DM	-	+	2605.92	3353.04	0.0235294	0.0235294	Tandem	FALSE	0.727237	-0.0706404
R1_DM	R1_DM	-	+	4366.93	5411.91	0.0470588	0.0470588	Tandem	FALSE	0.967213	0.0119275
R1_DM	R1_DM	-	+	3194.63	5301.97	0.0117647	0.0117647	Tandem	FALSE	0.576326	-0.115904
R1_DM	R1_DM	-	+	4424.3	5305.37	0.0117647	0.0117647	Tandem	FALSE	0.576326	-0.115904
R1_DM	R1_DM	-	+	2663.48	890.464	0.0352941	0.0352941	Deletion	FALSE	0.576326	-0.119479
R1_DM	R1_DM	-	+	5097.32	1801.68	0.0117647	0.0117647	Deletion	FALSE	0.371497	0.170591
R1_DM	R1_DM	-	+	789.355	2917.31	0.0117647	0.0117647	Tandem	FALSE	0.727991	-0.0693486
R1_DM	R1_DM	-	+	4877.54	891.283	0.0117647	0.0117647	Deletion	FALSE	0.75906	-0.0621862
R1_DM	R1_DM	-	+	3647.83	3213.7	0.294118	0.352941	Deletion	FALSE	0.355475	0.175988
R1_DM	R1_DM	-	+	497.188	5218.12	0.117647	0.141176	Tandem	FALSE	0.717681	-0.0747122
R1_DM	R1_DM	-	+	1949.19	5401.44	0.0117647	0.0117647	Tandem	FALSE	0.483406	0.141941
R1_DM	R1_DM	-	+	3943.37	4834.37	0.0117647	0.0470588	Tandem	FALSE	0.532836	0.127617
R1_DM	R1_DM	-	+	2526.78	1307.53	0.0470588	0.0470588	Deletion	FALSE	0.227273	-0.223298
R1_DM	R1_DM	-	+	652.816	3111.53	0.0235294	0.0235294	Tandem	FALSE	0.345898	-0.177635
R1_DM	R1_DM	-	+	2793.58	5391.59	0.0235294	0.0235294	Tandem	FALSE	0.923975	0.0210692
R1_DM	R1_DM	-	+	2197.09	609.398	0.0588235	0.0705882	Deletion	FALSE	0.321356	0.192469
R1_DM	R1_DM	-	+	3842.02	1337.06	0.0352941	0.117647	Deletion	FALSE	0.332055	0.190021
R1_DM	R1_DM	-	+	882.14	5235.97	0.0235294	0.0235294	Tandem	FALSE	0.576326	-0.116495
R1_DM	R1_DM	-	+	2877.25	5380.16	0.0117647	0.0235294	Tandem	FALSE	0.717681	-0.0765109
R1_DM	R1_DM	-	+	279.276	4550.47	0.0235294	0.0235294	Tandem	FALSE	0.638025	0.0974939
R1_DM	R1_DM	-	+	2558.64	2964.7	0.0117647	0.0117647	Tandem	FALSE	0.635294	-0.0979981
R1_DM	R1_DM	-	+	1425.37	3461.04	0.0235294	0.0235294	Tandem	FALSE	0.982129	0.00833179
R1_DM	R1_DM	-	+	3973.33	3016.49	0.117647	0.117647	Deletion	FALSE	0.172994	-0.245268
R1_DM	R1_DM	-	+	4330.74	501.337	0.0117647	0.0117647	Deletion	FALSE	0.690368	-0.0836733
R1_DM	R1_DM	-	+	899.214	4695.81	0.0470588	0.0470588	Tandem	FALSE	0.0601415	0.301856
R1_DM	R1_DM	-	+	4724.91	2822.66	0.0117647	0.0117647	Deletion	FALSE	0.639045	-0.0944169
R1_DM	R1_DM	-	+	3672.7	5419.75	0.0235294	0.0235294	Tandem	FALSE	0.826905	0.0465441
R1_DM	R1_DM	-	+	4239.7	1820.8	0.0352941	0.0352941	Deletion	FALSE	0.397983	-0.165517
R1_DM	R1_DM	-	+	1718.68	1610.74	0.0705882	0.976471	Deletion	FALSE	0.696406	0.0825201
R1_DM	R1_DM	-	+	4141.71	3504.01	0.141176	0.176471	Deletion	FALSE	0.621681	-0.101774
R1_DM	R1_DM	-	+	1423.32	3817.68	0.0117647	0.0117647	Tandem	FALSE	0.371497	0.170591
R1_DM	R1_DM	-	+	4425.49	547.488	0.0117647	0.0235294	Deletion	FALSE	0.576326	-0.119485
R1_DM	R1_DM	-	+	4161.25	554.191	0.0235294	0.0352941	Deletion	FALSE	0.852589	-0.0419916
R1_DM	R1_DM	-	+	3939.2	5120.05	0.0235294	0.0235294	Tandem	FALSE	0.727237	-0.0706404
R1_DM	R1_DM	-	+	4970.58	5425.23	0.105882	0.117647	Tandem	FALSE	0.895854	-0.0320815
R1_DM	R1_DM	-	+	4750.82	4491.92	0.129412	0.341176	Deletion	FALSE	0.684433	-0.0852541
R1_DM	R1_DM	-	+	3568.72	1617.48	0.0117647	0.0117647	Deletion	FALSE	0.371497	0.170591
R1_DM	R1_DM	-	+	-52.6359	2044.64	0.0235294	0.0235294	Tandem	FALSE	0.203092	0.232511
R1_DM	R1_DM	-	+	3136.47	2776.84	0.611765	1	Deletion	FALSE	0.371497	0.171626
R1_DM	R1_DM	-	+	2720.5	5385.49	0.0588235	0.0588235	Tandem	FALSE	0.304963	-0.201566
R1_DM	R1_DM	-	+	2029.51	5402.07	0.0470588	0.0705882	Tandem	FALSE	0.795828	-0.0546061
R1_DM	R1_DM	-	+	4653.13	5459.96	0.0117647	0.0117647	Tandem	FALSE	0.864879	0.0380869
R1_DM	R1_DM	-	+	5048.85	2649.79	0.0235294	0.0235294	Deletion	FALSE	0.455647	-0.149613
R1_DM	R1_DM	-	+	3081.85	2803.18	0.858824	1.87059	Deletion	FALSE	0.0227627	0.3397
R1_DM	R1_DM	-	+	4007.46	616.649	0.0235294	0.0235294	Deletion	FALSE	0.544613	0.125516
R1_DM	R1_DM	-	+	3190.26	708.572	0.0117647	0.0352941	Deletion	FALSE	0.341429	-0.180365
R1_DM	R1_DM	-	+	2986.83	4951.42	0.0117647	0.0117647	Tandem	FALSE	0.98536	0.00585629
R1_DM	R1_DM	-	+	4696.85	350.404	0.0235294	0.0235294	Deletion	FALSE	0.703905	-0.0808303
R1_DM	R1_DM	-	+	3055.54	2600.11	0.0352941	0.0352941	Deletion	FALSE	0.814448	0.0500269
R1_DM	R1_DM	-	+	2706.58	680.294	0.0117647	0.0117647	Deletion	FALSE	0.75906	-0.0621862
R1_DM	R1_DM	-	+	4128.25	4947.37	0.0235294	0.0235294	Tandem	FALSE	0.345898	-0.177635
R1_DM	R1_DM	-	+	3119.8	5355.7	0.0352941	0.0352941	Tandem	FALSE	0.923975	-0.0211236
R1_DM	R1_DM	-	+	-151.202	4884.85	0.141176	0.141176	Tandem	FALSE	0.496643	0.139311
R1_DM	R1_DM	-	+	4911.22	3044.92	0.0117647	0.0117647	Deletion	FALSE	0.75906	-0.0621862
R1_DM	R1_DM	-	+	5026.36	3803.93	0.0117647	0.0117647	Deletion	FALSE	0.420974	-0.158878
R1_DM	R1_DM	-	+	1776.34	1469.34	0.0823529	0.0823529	Deletion	FALSE	0.867156	0.037149
R1_DM	R1_DM	-	+	3356.3	567.018	0.0470588	0.0470588	Deletion	FALSE	0.0408896	0.318267
R1_DM	R1_DM	-	+	4482.38	3728.37	0.0117647	0.0117647	Deletion	FALSE	0.576326	-0.115904
R1_DM	R1_DM	-	+	3523.49	2906.58	0.0117647	0.0117647	Deletion	FALSE	0.610675	-0.10516
R1_DM	R1_DM	-	+	4726.54	3547.55	0.0235294	0.0941176	Deletion	FALSE	0.576326	0.118243
R1_DM	R1_DM	-	+	4859.99	1907.76	0.0117647	0.0117647	Deletion	FALSE	0.639045	-0.0944169
R1_DM	R1_DM	-	+	3326.08	5388.34	0.0117647	0.0235294	Tandem	FALSE	0.717681	-0.0765109
R1_DM	R1_DM	-	+	4543.69	2573.06	0.0235294	0.0235294	Deletion	FALSE	0.233932	0.219773
R1_DM	R1_DM	-	+	3517.62	5366.09	0.0352941	0.0352941	Tandem	FALSE	0.632555	0.100251
R1_DM	R1_DM	-	+	614.122	2972.21	0.0235294	0.0235294	Tandem	FALSE	0.308954	-0.195467
R1_DM	R1_DM	-	+	2425.38	1547.12	0.0117647	0.0117647	Deletion	FALSE	0.610675	-0.10516
R1_DM	R1_DM	-	+	5077.49	1621.85	0.0117647	0.0117647	Deletion	FALSE	0.639045	-0.0944169
R1_DM	R1_DM	-	+	4273.4	1687.5	0.0941176	0.0941176	Deletion	FALSE	0.692473	-0.0832048
R1_DM	R1_DM	-	+	3405.74	2871.19	0.188235	0.282353	Deletion	FALSE	0.741591	0.0672478
R1_DM	R1_DM	-	+	1594.72	4329.88	0.0117647	0.0117647	Tandem	FALSE	0.371497	0.170591
R1_DM	R1_DM	-	+	2196.45	1633.56	0.8	0.894118	Deletion	FALSE	0.241308	0.217274
R1_DM	R1_DM	-	+	3638.74	2212.86	0.0117647	0.0117647	Deletion	FALSE	0.794085	-0.0550238
R1_DM	R1_DM	-	+	-34.4149	374.415	0.0235294	0.0235294	Tandem	FALSE	0.952128	0.0159743
R1_DM	R1_DM	-	+	3310.84	1886.08	0.0235294	0.0235294	Deletion	FALSE	0.576326	0.117874
R1_DM	R1_DM	-	+	2745.57	3293.63	0.0117647	0.0117647	Tandem	FALSE	0.916813	-0.0227932
R1_DM	R1_DM	-	+	1034.01	2526.41	0.0117647	0.0117647	Tandem	FALSE	0.895854	-0.0299556
R1_DM	R1_DM	-	+	3093.83	1043.11	0.0117647	0.0352941	Deletion	FALSE	0.717681	-0.0729298
R1_DM	R1_DM	-	+	566.847	968.153	0.0117647	0.0117647	Tandem	FALSE	0.5868	0.113292
R1_DM	R1_DM	-	+	2117.93	247.072	0.0117647	0.0117647	Deletion	FALSE	0.341429	-0.180365
R1_DM	R1_DM	-	+	2412.17	2231.71	0.247059	1.02353	Deletion	FALSE	0.307181	-0.200305
R1_DM	R1_DM	-	+	3625.05	605.065	0.0117647	0.0117647	Deletion	FALSE	0.717681	-0.0729298
R1_DM	R1_DM	-	+	3501.04	3200.51	0.188235	0.2	Deletion	FALSE	0.849731	-0.0425438
R1_DM	R1_DM	-	+	1813.91	1013.47	0.588235	0.694118	Deletion	FALSE	0.779444	0.0583956
R1_DM	R1_DM	-	-	375.129	4792.4	0.894118	2.16471	Inversion	FALSE	0.507822	-0.13695
R1_DM	R1_DM	-	-	2632.42	3120.69	0.0588235	0.0588235	Inversion	FALSE	0.807092	0.052805
R1_DM	R1_DM	-	-	1465.41	4949.33	0.0117647	0.0117647	Inversion	FALSE	0.75906	-0.0621862
R1_DM	R1_DM	-	-	1207.79	3210.66	0.0352941	0.0352941	Inversion	FALSE	0.933212	-0.0190309
R1_DM	R1_DM	-	-	1301.08	4963.08	0.0117647	0.0117647	Inversion	FALSE	0.75906	-0.0621862
R1_DM	R1_DM	-	-	3039.9	3427.52	0.0352941	0.0352941	Inversion	FALSE	0.933212	-0.0190309
R1_DM	R1_DM	-	-	825.164	3311.72	0.0117647	0.0235294	Inversion	FALSE	0.75906	-0.0621862
R1_DM	R1_DM	-	-	-45.0822	780.118	0.0117647	0.0117647	Inversion	FALSE	0.838695	-0.0442803
R1_DM	R1_DM	-	-	332.464	4629.8	0.0117647	0.0117647	Inversion	FALSE	0.864879	0.0380869
R1_DM	R1_DM	-	-	1109.2	3164.53	0.0705882	0.0941176	Inversion	FALSE	0.861899	0.040426
R1_DM	R1_DM	-	-	324.884	4142.88	0.0117647	0.0117647	Inversion	FALSE	0.108345	-0.269895
R1_DM	R1_DM	-	-	3315.24	5074.24	0.0117647	0.0117647	Inversion	FALSE	0.794085	-0.0550238
R1_DM	R1_DM	-	-	-103.498	4284	0.0117647	0.0117647	Inversion	FALSE	0.963891	0.0130187
R1_DM	R1_DM	-	-	1953.37	2771.57	0.0117647	0.0117647	Inversion	FALSE	0.916813	-0.0227932
R1_DM	R1_DM	-	-	-73.095	3089.9	0.0117647	0.0117647	Inversion	FALSE	0.794085	-0.0550238
R1_DM	R1_DM	-	-	-21.9224	4726.41	0.0117647	0.0117647	Inversion	FALSE	0.576326	-0.115904
R1_DM	R1_DM	-	-	42.0376	3144.16	0.0117647	0.0117647	Inversion	FALSE	0.717681	-0.0729298
R1_DM	R1_DM	-	-	4519.84	5033.17	0.0117647	0.0117647	Inversion	FALSE	0.963891	0.0130187
R1_DM	R1_DM	-	-	28.6291	4941.06	0.0117647	0.0117647	Inversion	FALSE	0.835001	0.0452493
R1_DM	R1_DM	-	-	1259.87	2298.71	0.0117647	0.0117647	Inversion	FALSE	0.593037	0.109711
R1_DM	R1_DM	-	-	2261.54	3304.54	0.0117647	0.0117647	Inversion	FALSE	0.61711	0.102548
R1_DM	R1_DM	+	+	2168.06	1734.37	0.2	0.2	Inversion	FALSE	0.707011	-0.0803176
R1_DM	R1_DM	+	+	5232.19	397.794	0.823529	0.823529	Inversion	FALSE	0.452442	0.150388
R1_DM	R1_DM	+	+	2342.23	1438.73	0.0117647	0.0117647	Inversion	FALSE	0.916813	-0.0227932
R1_DM	R1_DM	+	+	4867.61	1169.12	0.0823529	0.105882	Inversion	FALSE	0.900422	-0.0269576
R1_DM	R1_DM	+	+	3344.04	1285.81	0.0235294	0.0235294	Inversion	FALSE	0.982129	0.00833179
R1_DM	R1_DM	+	+	2741.7	2281.2	0.0117647	0.0117647	Inversion	FALSE	0.717681	0.0738988
R1_DM	HMSBEAGLE_I	-	-	2207.46	-120.704	0.0352941	0.0352941	Junction	FALSE	0.476076	0.144197
R1_DM	HMSBEAGLE_I	+	+	5481.08	5363.58	0.0117647	0.0117647	Junction	FALSE	0.341429	0.181334
R1_DM	HMSBEAGLE_I	+	+	2480.8	6652.1	0.0352941	0.0352941	Junction	FALSE	0.307181	0.198606
R1_DM	TAHRE	-	-	4912.68	2652.12	0.0470588	0.0470588	Junction	FALSE	0.233932	0.219801
R1_DM	TAHRE	+	+	5236.56	2907.79	0.0117647	0.0117647	Junction	FALSE	0.441207	0.152685
R1_DM	G2_DM	+	+	1167.49	3108.56	0.188235	0.2	Junction	FALSE	0.307181	-0.20028
R1_DM	G2_DM	+	+	3902.75	1684.17	0.0352941	0.0588235	Junction	FALSE	0.249486	0.214981
R1_DM	G2_DM	+	+	3711.15	1890.55	0.0117647	0.0117647	Junction	FALSE	0.532836	0.127617
R1_DM	4	-	+	804.548	591618	0.858824	0.941176	Junction	FALSE	0.978799	-0.0100228
R1_DM	4	-	+	1757.88	196042	0.0117647	0.0117647	Junction	FALSE	0.639045	0.0953859
R1_DM	4	-	+	3222.31	506256	0.0117647	0.0117647	Junction	FALSE	0.363682	0.174172
R1_DM	4	+	-	5435.19	596150	0.952941	0.964706	Junction	FALSE	0.864879	-0.0384702
R1_DM	4	+	-	4821.99	1.00144e+06	0.0117647	0.0117647	Junction	FALSE	0.5868	0.113292
R1_DM	4	+	-	5401.89	506163	0.0117647	0.0117647	Junction	FALSE	0.363682	0.174172
R1_DM	G6_DM	-	+	4980.05	1135.62	0.0941176	0.117647	Junction	FALSE	0.963891	0.0132749
R1_DM	G6_DM	-	-	4482.57	1585.57	0.0117647	0.0117647	Junction	FALSE	0.992824	0.00227511
R1_DM	G6_DM	-	-	-23.8348	-0.784814	0.0352941	0.0352941	Junction	FALSE	0.332681	-0.188536
R1_DM	GYPSY2_I	-	-	3612.01	5690.77	0.541176	0.564706	Junction	FALSE	0.701539	0.0816943
R1_DM	MDG1_I	-	+	5029.04	6763.96	0.0117647	0.0117647	Junction	FALSE	0.727991	-0.0693486
R1_DM	2R	-	+	106.919	1.1506e+06	0.0588235	0.0588235	Junction	FALSE	0.22584	0.225121
R1_DM	2R	-	+	-164.372	1.14323e+06	0.152941	0.152941	Junction	FALSE	0.757964	-0.0640918
R1_DM	2R	-	+	-76.1605	1.15064e+06	0.682353	0.682353	Junction	FALSE	0.420974	-0.160203
R1_DM	2R	-	+	57.7262	1.14323e+06	0.0235294	0.0235294	Junction	FALSE	0.501621	0.138254
R1_DM	2R	-	+	4560.77	2.75019e+06	0.176471	0.176471	Junction	FALSE	0.208187	0.230467
R1_DM	2R	-	+	1666.4	1.56364e+06	0.0117647	0.0117647	Junction	FALSE	0.717681	0.0738988
R1_DM	2R	-	+	3045.85	1.43407e+06	0.0235294	0.0235294	Junction	FALSE	0.717681	0.0745665
R1_DM	2R	-	+	4951.01	8.52794e+06	0.0235294	0.0235294	Junction	FALSE	0.269541	0.209583
R1_DM	2R	-	+	4165.36	2.00815e+07	0.0117647	0.0117647	Junction	FALSE	0.717681	-0.0729298
R1_DM	2R	-	-	2426.47	4.87127e+06	0.494118	0.529412	Junction	FALSE	0.507822	-0.136702
R1_DM	2R	-	-	-7.78492	5.07977e+06	0.0117647	0.0117647	Junction	FALSE	0.717681	0.0738988
R1_DM	2R	-	-	4878.38	1.60953e+07	0.0235294	0.0235294	Junction	FALSE	0.474952	-0.144518
R1_DM	2R	-	-	1708.14	3.06977e+06	0.482353	0.541176	Junction	FALSE	0.341429	0.182701
R1_DM	2R	-	-	2463.99	4.87046e+06	0.0117647	0.0117647	Junction	FALSE	0.639045	-0.0944169
R1_DM	2R	-	-	4773.05	7.33316e+06	0.0117647	0.0117647	Junction	FALSE	0.717681	0.0738988
R1_DM	2R	-	-	3823.52	1.84757e+07	0.0117647	0.0117647	Junction	FALSE	0.895854	0.0309246
R1_DM	2R	+	-	5496.39	1.16084e+06	0.588235	0.588235	Junction	FALSE	0.412746	0.162227
R1_DM	2R	+	-	5387.06	2.75097e+06	0.988235	1.09412	Junction	FALSE	0.967213	0.0118037
R1_DM	2R	+	-	753.482	5.47104e+06	0.105882	0.105882	Junction	FALSE	0.75906	0.0623949
R1_DM	2R	+	-	5304.13	8.52783e+06	0.0117647	0.0117647	Junction	FALSE	0.593037	0.109711
R1_DM	2R	+	-	5348.46	2.00815e+07	0.0117647	0.0117647	Junction	FALSE	0.717681	-0.0729298
R1_DM	2R	+	+	2937.79	4.87076e+06	0.482353	0.494118	Junction	FALSE	0.414172	-0.161937
R1_DM	2R	+	+	5341.23	1.84758e+07	0.0117647	0.0117647	Junction	FALSE	0.895854	0.0309246
R1_DM	2R	+	+	5318.33	1.60953e+07	0.0117647	0.0117647	Junction	FALSE	0.537373	-0.126648
R1_DM	2R	+	+	2196	3.06928e+06	0.0705882	0.0705882	Junction	FALSE	0.662809	0.0901703
R1_DM	Phanio_I	+	+	4028.98	3769.48	0.0235294	0.0235294	Junction	FALSE	0.442419	-0.15216
R1_DM	Phanio_I	+	+	2369.51	4017.01	0.0117647	0.0117647	Junction	FALSE	0.576326	-0.119485
R1_DM	TIRANT_LTR	-	+	2408.52	409.538	0.0941176	0.105882	Junction	FALSE	0.526457	0.132214
R1_DM	TIRANT_LTR	-	+	2894.99	358.764	0.0117647	0.0117647	Junction	FALSE	0.639045	-0.0944169
R1_DM	TIRANT_LTR	-	-	2415.81	11.9284	0.0588235	0.0705882	Junction	FALSE	0.98536	0.00751677
R1_DM	TIRANT_LTR	-	-	1462.79	123.677	0.0235294	0.0235294	Junction	FALSE	0.345898	-0.177635
R1_DM	TIRANT_LTR	-	-	3044.36	31.7862	0.0117647	0.0117647	Junction	FALSE	0.992824	-0.00130608
R1_DM	TIRANT_LTR	+	-	2418.56	18.1885	0.0823529	0.0941176	Junction	FALSE	0.455109	0.149949
R1_DM	TIRANT_LTR	+	-	2902.91	-42.9144	0.0117647	0.0117647	Junction	FALSE	0.639045	-0.0944169
R1_DM	TIRANT_LTR	+	+	1725.68	275.934	0.0235294	0.0235294	Junction	FALSE	0.345898	-0.177635
R1_DM	TIRANT_LTR	+	+	2915.43	558.678	0.0117647	0.0117647	Junction	FALSE	0.992824	-0.00130608
R1_DM	TIRANT_LTR	+	+	2083.74	429.838	0.0235294	0.0235294	Junction	FALSE	0.332681	0.189203
R1_DM	TIRANT_LTR	+	+	3174.73	316.328	0.0117647	0.0117647	Junction	FALSE	0.992824	-0.00130608
R1_DM	TIRANT_LTR	+	+	2445.39	386.825	0.0470588	0.0588235	Junction	FALSE	0.341429	-0.182601
R1_DM	Dmel_rRNA_cistron_	-	+	892.531	6873.29	0.129412	0.388235	Junction	FALSE	0.214806	0.227489
R1_DM	Dmel_rRNA_cistron_	-	+	4004.83	6878.36	0.176471	0.305882	Junction	FALSE	0.341429	0.186105
R1_DM	Dmel_rRNA_cistron_	-	+	1895.78	6855.13	0.129412	0.317647	Junction	FALSE	0.307181	0.197931
R1_DM	Dmel_rRNA_cistron_	-	+	3089.81	6888.93	0.0705882	0.105882	Junction	FALSE	0.986902	0.00534132
R1_DM	Dmel_rRNA_cistron_	-	+	-16.6732	6839.07	1	69.9529	Junction	FALSE	0.112216	-0.268046
R1_DM	Dmel_rRNA_cistron_	-	+	4845.85	6839.95	0.364706	1.42353	Junction	FALSE	0.900422	-0.0283164
R1_DM	Dmel_rRNA_cistron_	-	+	3420.46	6904.32	0.0705882	0.211765	Junction	FALSE	0.318417	-0.193493
R1_DM	Dmel_rRNA_cistron_	-	+	3727.34	6872.11	0.117647	0.258824	Junction	FALSE	0.345898	0.178616
R1_DM	Dmel_rRNA_cistron_	-	+	4880.11	5424.02	0.0117647	0.0117647	Junction	FALSE	0.895854	-0.0299556
R1_DM	Dmel_rRNA_cistron_	-	+	4231.44	6857.17	0.211765	0.552941	Junction	FALSE	0.526457	0.13031
R1_DM	Dmel_rRNA_cistron_	-	+	4602.11	6844.7	0.0588235	0.0823529	Junction	FALSE	0.341429	-0.183655
R1_DM	Dmel_rRNA_cistron_	-	+	1302.38	7800.12	0.0117647	0.0117647	Junction	FALSE	0.639045	0.0953859
R1_DM	Dmel_rRNA_cistron_	-	+	-65.3477	3199.18	0.0117647	0.0117647	Junction	FALSE	0.639045	-0.0944169
R1_DM	Dmel_rRNA_cistron_	-	+	3640.99	6274.85	0.0117647	0.0352941	Junction	FALSE	0.916813	-0.0227932
R1_DM	Dmel_rRNA_cistron_	-	+	2529.26	6857.88	0.0470588	0.0705882	Junction	FALSE	0.717681	-0.0734401
R1_DM	Dmel_rRNA_cistron_	-	+	4463.73	6862.5	0.117647	0.223529	Junction	FALSE	0.466098	-0.148076
R1_DM	Dmel_rRNA_cistron_	-	+	1179.06	6888.99	0.0823529	0.152941	Junction	FALSE	0.185171	-0.239093
R1_DM	Dmel_rRNA_cistron_	-	+	-95.8749	6927.51	0.247059	0.247059	Junction	FALSE	0.963891	0.0128396
R1_DM	Dmel_rRNA_cistron_	-	+	4629.05	6769.02	0.0352941	0.0470588	Junction	FALSE	0.591247	0.111554
R1_DM	Dmel_rRNA_cistron_	-	+	2373.64	6859.52	0.105882	0.188235	Junction	FALSE	0.780999	-0.0576795
R1_DM	Dmel_rRNA_cistron_	-	+	1369.89	6867.02	0.0470588	0.0588235	Junction	FALSE	0.639045	-0.0946163
R1_DM	Dmel_rRNA_cistron_	-	+	2537.14	5229.04	0.0117647	0.0117647	Junction	FALSE	0.895854	0.0309246
R1_DM	Dmel_rRNA_cistron_	-	+	4708.77	6863.83	0.188235	0.541176	Junction	FALSE	0.172994	-0.245164
R1_DM	Dmel_rRNA_cistron_	-	+	1754.54	6847.74	0.117647	0.188235	Junction	FALSE	0.307181	0.200459
R1_DM	Dmel_rRNA_cistron_	-	+	1615.38	6564.5	0.0235294	0.0470588	Junction	FALSE	0.206737	-0.231132
R1_DM	Dmel_rRNA_cistron_	-	+	3667.27	6874.15	0.141176	0.588235	Junction	FALSE	0.507822	0.137065
R1_DM	Dmel_rRNA_cistron_	-	+	3582.8	6915.34	0.0823529	0.152941	Junction	FALSE	0.864879	0.0386618
R1_DM	Dmel_rRNA_cistron_	-	+	4411.21	6851.82	0.0823529	0.164706	Junction	FALSE	0.183792	-0.240122
R1_DM	Dmel_rRNA_cistron_	-	+	1411.5	6842.23	0.129412	0.141176	Junction	FALSE	0.963891	0.0128109
R1_DM	Dmel_rRNA_cistron_	-	+	3812.02	6841.34	0.141176	0.317647	Junction	FALSE	0.610675	-0.105087
R1_DM	Dmel_rRNA_cistron_	-	+	4948.71	6834.42	0.752941	2.51765	Junction	FALSE	0.717681	-0.0740737
R1_DM	Dmel_rRNA_cistron_	-	+	1514.47	6876.66	0.152941	0.235294	Junction	FALSE	0.863095	-0.0402069
R1_DM	Dmel_rRNA_cistron_	-	+	1932.7	6830.54	0.129412	0.4	Junction	FALSE	0.179079	-0.242923
R1_DM	Dmel_rRNA_cistron_	-	+	5113.38	6700.37	0.576471	0.588235	Junction	FALSE	0.979032	-0.00991401
R1_DM	Dmel_rRNA_cistron_	-	+	2832.23	6796.18	0.105882	0.188235	Junction	FALSE	0.471225	-0.147058
R1_DM	Dmel_rRNA_cistron_	-	+	4571.43	6729.71	0.0470588	0.0588235	Junction	FALSE	0.864879	-0.0396256
R1_DM	Dmel_rRNA_cistron_	-	+	4606.58	7043.7	0.0235294	0.0235294	Junction	FALSE	0.75906	-0.0629979
R1_DM	Dmel_rRNA_cistron_	-	+	643.658	6004.48	0.0470588	0.0470588	Junction	FALSE	0.341429	-0.179535
R1_DM	Dmel_rRNA_cistron_	-	+	3401.88	5523.37	0.105882	0.117647	Junction	FALSE	0.741591	-0.066709
R1_DM	Dmel_rRNA_cistron_	-	+	4179.4	6161.06	0.0117647	0.0117647	Junction	FALSE	0.717681	-0.0765109
R1_DM	Dmel_rRNA_cistron_	-	+	2438.72	6854.01	0.0588235	0.0941176	Junction	FALSE	0.864879	-0.0388839
R1_DM	Dmel_rRNA_cistron_	-	+	1904.63	8202.13	0.0588235	0.117647	Junction	FALSE	0.552602	0.123972
R1_DM	Dmel_rRNA_cistron_	-	+	1267.82	6867.5	0.0941176	0.152941	Junction	FALSE	0.484367	-0.141732
R1_DM	Dmel_rRNA_cistron_	-	+	2619.89	6837.38	0.0588235	0.0705882	Junction	FALSE	0.526457	0.130387
R1_DM	Dmel_rRNA_cistron_	-	+	3724.06	8126.55	0.0705882	0.152941	Junction	FALSE	0.593037	0.110154
R1_DM	Dmel_rRNA_cistron_	-	+	4673.63	7939.44	0.0117647	0.0352941	Junction	FALSE	0.576326	-0.115904
R1_DM	Dmel_rRNA_cistron_	-	+	2151.73	6874.03	0.0588235	0.0823529	Junction	FALSE	0.646414	-0.0932348
R1_DM	Dmel_rRNA_cistron_	-	+	717.861	7060.04	0.0117647	0.0117647	Junction	FALSE	0.341429	-0.180365
R1_DM	Dmel_rRNA_cistron_	-	+	3124.49	6870.1	0.105882	0.188235	Junction	FALSE	0.427255	-0.155557
R1_DM	Dmel_rRNA_cistron_	-	+	5026.65	6786.95	0.517647	0.929412	Junction	FALSE	0.992824	0.00378276
R1_DM	Dmel_rRNA_cistron_	-	+	2632.56	6910.65	0.0588235	0.105882	Junction	FALSE	0.673144	-0.0873905
R1_DM	Dmel_rRNA_cistron_	-	+	2852.99	6859.16	0.0705882	0.305882	Junction	FALSE	0.816241	-0.0484998
R1_DM	Dmel_rRNA_cistron_	-	+	-29.6495	5844.85	0.0235294	0.0235294	Junction	FALSE	0.532836	0.128064
R1_DM	Dmel_rRNA_cistron_	-	+	994.824	6851.5	0.0705882	0.105882	Junction	FALSE	0.699933	-0.081957
R1_DM	Dmel_rRNA_cistron_	-	+	2174.21	6849.8	0.152941	0.211765	Junction	FALSE	0.526457	0.130393
R1_DM	Dmel_rRNA_cistron_	-	+	4920.7	6873.65	0.211765	0.364706	Junction	FALSE	0.615921	-0.104206
R1_DM	Dmel_rRNA_cistron_	-	+	1907.81	6838.09	0.0588235	0.129412	Junction	FALSE	0.307181	0.196391
R1_DM	Dmel_rRNA_cistron_	-	+	1317.68	7116.93	0.8	0.8	Junction	FALSE	0.29761	-0.203497
R1_DM	Dmel_rRNA_cistron_	-	+	4455.63	6884.63	0.0235294	0.105882	Junction	FALSE	0.968815	-0.0114891
R1_DM	Dmel_rRNA_cistron_	-	+	2074.39	6856.02	0.117647	0.176471	Junction	FALSE	0.646414	0.0932875
R1_DM	Dmel_rRNA_cistron_	-	+	3190.13	6846.51	0.317647	1.12941	Junction	FALSE	0.727991	0.0698985
R1_DM	Dmel_rRNA_cistron_	-	+	4978.44	7040.57	0.164706	0.164706	Junction	FALSE	0.0273415	0.333027
R1_DM	Dmel_rRNA_cistron_	-	+	-55.2472	6893.11	0.258824	0.564706	Junction	FALSE	0.895854	-0.0319318
R1_DM	Dmel_rRNA_cistron_	-	+	1845.35	6881.79	0.0823529	0.141176	Junction	FALSE	0.667471	-0.0892478
R1_DM	Dmel_rRNA_cistron_	-	+	4690.47	6873.63	0.129412	0.247059	Junction	FALSE	0.944623	0.0174793
R1_DM	Dmel_rRNA_cistron_	-	+	4336.71	6874.5	0.105882	0.423529	Junction	FALSE	0.323737	0.191841
R1_DM	Dmel_rRNA_cistron_	-	+	4808.08	6864.95	0.729412	5.70588	Junction	FALSE	0.0111915	-0.363856
R1_DM	Dmel_rRNA_cistron_	-	+	4499.54	6842.5	0.152941	0.364706	Junction	FALSE	0.185171	0.239288
R1_DM	Dmel_rRNA_cistron_	-	+	3532.35	6911.35	0.0588235	0.0941176	Junction	FALSE	0.526457	-0.130302
R1_DM	Dmel_rRNA_cistron_	-	+	3442.74	6874.88	0.0470588	0.2	Junction	FALSE	0.33574	0.187962
R1_DM	Dmel_rRNA_cistron_	-	+	2338.96	6138.37	0.0352941	0.0352941	Junction	FALSE	0.307181	0.198606
R1_DM	Dmel_rRNA_cistron_	-	+	3951.26	6879.45	0.117647	0.129412	Junction	FALSE	0.987042	-0.00524396
R1_DM	Dmel_rRNA_cistron_	-	+	137.712	7110.74	0.0235294	0.0235294	Junction	FALSE	0.717681	-0.0757353
R1_DM	Dmel_rRNA_cistron_	-	+	5074.35	6751.27	0.341176	0.470588	Junction	FALSE	0.575478	0.120251
R1_DM	Dmel_rRNA_cistron_	-	+	951.512	3166.79	0.0117647	0.0117647	Junction	FALSE	0.98536	0.00585629
R1_DM	Dmel_rRNA_cistron_	-	+	4049.83	5951.97	0.0117647	0.0117647	Junction	FALSE	0.673144	-0.0872545
R1_DM	Dmel_rRNA_cistron_	-	+	4762.33	6199.17	0.0117647	0.0117647	Junction	FALSE	0.814448	0.0488305
R1_DM	Dmel_rRNA_cistron_	-	+	2341.36	4694.08	0.0352941	0.0352941	Junction	FALSE	0.332681	-0.188536
R1_DM	Dmel_rRNA_cistron_	-	+	3890.5	5540.5	0.0117647	0.0117647	Junction	FALSE	0.963891	0.0130187
R1_DM	Dmel_rRNA_cistron_	-	+	4810.94	2464.47	0.0117647	0.0117647	Junction	FALSE	0.526457	-0.130229
R1_DM	Dmel_rRNA_cistron_	-	+	2974.31	6860.08	0.211765	0.211765	Junction	FALSE	0.639045	0.0958698
R1_DM	Dmel_rRNA_cistron_	-	+	5058.57	3585.93	0.0117647	0.0117647	Junction	FALSE	0.992824	-0.00130608
R1_DM	Dmel_rRNA_cistron_	-	+	4865.71	8097.81	0.0117647	0.0235294	Junction	FALSE	0.814448	0.0488305
R1_DM	Dmel_rRNA_cistron_	-	+	2322.82	6859.35	0.164706	0.247059	Junction	FALSE	0.125098	0.261461
R1_DM	Dmel_rRNA_cistron_	-	+	583.164	7005.5	0.0588235	0.0588235	Junction	FALSE	0.392119	-0.167103
R1_DM	Dmel_rRNA_cistron_	-	+	4088.55	6744.1	0.0352941	0.0352941	Junction	FALSE	0.307181	0.198606
R1_DM	Dmel_rRNA_cistron_	-	+	3882.97	6877.48	0.0588235	0.129412	Junction	FALSE	0.981524	-0.00895998
R1_DM	Dmel_rRNA_cistron_	-	+	4100.03	6934.39	0.0588235	0.105882	Junction	FALSE	0.864433	0.0399703
R1_DM	Dmel_rRNA_cistron_	-	+	3127.13	7176.87	0.0117647	0.0117647	Junction	FALSE	0.864879	0.0380869
R1_DM	Dmel_rRNA_cistron_	-	+	3302.18	7041.32	0.0235294	0.0235294	Junction	FALSE	0.673144	0.0873039
R1_DM	Dmel_rRNA_cistron_	-	+	28.725	6803.58	0.0470588	0.0588235	Junction	FALSE	0.427255	0.155591
R1_DM	Dmel_rRNA_cistron_	-	+	2258.49	6856.72	0.164706	0.282353	Junction	FALSE	0.447875	0.151168
R1_DM	Dmel_rRNA_cistron_	-	+	2752.15	6856.53	0.0941176	0.152941	Junction	FALSE	0.576326	-0.118186
R1_DM	Dmel_rRNA_cistron_	-	+	4591.76	6884.63	0.258824	0.447059	Junction	FALSE	0.209021	-0.23007
R1_DM	Dmel_rRNA_cistron_	-	+	394.503	6120.88	0.0235294	0.0235294	Junction	FALSE	0.768691	-0.0604504
R1_DM	Dmel_rRNA_cistron_	-	+	2030.08	6862.07	0.0470588	0.0705882	Junction	FALSE	0.912895	-0.0242626
R1_DM	Dmel_rRNA_cistron_	-	+	1831.93	5977.82	0.0117647	0.0352941	Junction	FALSE	0.963891	0.0130187
R1_DM	Dmel_rRNA_cistron_	-	+	311.386	6903.53	0.0470588	0.0470588	Junction	FALSE	0.341429	-0.181358
R1_DM	Dmel_rRNA_cistron_	-	+	1867.77	4337.28	0.0235294	0.0235294	Junction	FALSE	0.442419	-0.15216
R1_DM	Dmel_rRNA_cistron_	-	+	4716.03	4333.2	0.0117647	0.0117647	Junction	FALSE	0.900422	-0.0263744
R1_DM	Dmel_rRNA_cistron_	-	+	5043.61	5297.29	0.0117647	0.0117647	Junction	FALSE	0.900422	-0.0263744
R1_DM	Dmel_rRNA_cistron_	-	+	3303.39	6871.93	0.0588235	0.0941176	Junction	FALSE	0.532836	-0.128146
R1_DM	Dmel_rRNA_cistron_	-	+	3374.68	7849.52	0.0117647	0.0117647	Junction	FALSE	0.639045	0.0953859
R1_DM	Dmel_rRNA_cistron_	-	+	4519.72	6295.7	0.0117647	0.0117647	Junction	FALSE	0.108345	-0.269895
R1_DM	Dmel_rRNA_cistron_	-	+	2128.76	5707.36	0.0117647	0.0117647	Junction	FALSE	0.341429	-0.180365
R1_DM	Dmel_rRNA_cistron_	-	+	4732.03	6827.18	0.0941176	0.411765	Junction	FALSE	0.67939	-0.0860852
R1_DM	Dmel_rRNA_cistron_	-	+	4049.32	6831.68	0.0352941	0.0352941	Junction	FALSE	0.950087	0.0165443
R1_DM	Dmel_rRNA_cistron_	-	+	1525.27	6790.81	0.0588235	0.0823529	Junction	FALSE	0.932977	-0.0193553
R1_DM	Dmel_rRNA_cistron_	-	+	4381.15	2457.27	0.0352941	0.0352941	Junction	FALSE	0.441207	-0.152961
R1_DM	Dmel_rRNA_cistron_	-	+	2578.73	7333.54	0.0117647	0.0117647	Junction	FALSE	0.895854	0.0309246
R1_DM	Dmel_rRNA_cistron_	-	+	939.446	6844.72	0.0352941	0.0823529	Junction	FALSE	0.307181	0.197771
R1_DM	Dmel_rRNA_cistron_	-	+	4259.74	5360.7	0.0117647	0.0117647	Junction	FALSE	0.653116	0.0918047
R1_DM	Dmel_rRNA_cistron_	-	+	269.375	6899.8	0.0117647	0.0117647	Junction	FALSE	0.653116	0.0918047
R1_DM	Dmel_rRNA_cistron_	-	+	4598.17	5987.62	0.0117647	0.0117647	Junction	FALSE	0.420974	-0.158878
R1_DM	Dmel_rRNA_cistron_	-	+	3295.13	6818.41	0.0235294	0.0235294	Junction	FALSE	0.835001	-0.0451655
R1_DM	Dmel_rRNA_cistron_	-	+	720.867	6862.54	0.2	0.376471	Junction	FALSE	0.332681	0.189242
R1_DM	Dmel_rRNA_cistron_	-	+	4905.57	7513.25	0.0352941	0.0823529	Junction	FALSE	0.212549	-0.228237
R1_DM	Dmel_rRNA_cistron_	-	+	4266.7	7387.87	0.0352941	0.0470588	Junction	FALSE	0.265772	0.210496
R1_DM	Dmel_rRNA_cistron_	-	+	-35.7272	2165.38	0.0352941	0.0352941	Junction	FALSE	0.332681	-0.188536
R1_DM	Dmel_rRNA_cistron_	-	+	1156.8	6631.97	0.0117647	0.0235294	Junction	FALSE	0.717681	-0.0765109
R1_DM	Dmel_rRNA_cistron_	-	+	1671.24	289.162	0.0117647	0.0117647	Junction	FALSE	0.5868	-0.112323
R1_DM	Dmel_rRNA_cistron_	-	+	3455.71	6826.28	0.0588235	0.0941176	Junction	FALSE	0.197868	0.235394
R1_DM	Dmel_rRNA_cistron_	-	+	2900.63	5547.37	0.0117647	0.0235294	Junction	FALSE	0.727991	-0.0693486
R1_DM	Dmel_rRNA_cistron_	-	+	2991.48	6957.98	0.0470588	0.0588235	Junction	FALSE	0.864879	-0.0382508
R1_DM	Dmel_rRNA_cistron_	-	+	473.316	6827.35	0.0470588	0.0470588	Junction	FALSE	0.753208	0.0648075
R1_DM	Dmel_rRNA_cistron_	-	+	567.817	6812.33	0.0588235	0.0588235	Junction	FALSE	0.442419	-0.152333
R1_DM	Dmel_rRNA_cistron_	-	+	5030.88	7460.12	0.0117647	0.0117647	Junction	FALSE	0.639045	0.0953859
R1_DM	Dmel_rRNA_cistron_	-	+	5091.84	5755.66	0.0117647	0.0117647	Junction	FALSE	0.814448	0.0488305
R1_DM	Dmel_rRNA_cistron_	-	+	4095.12	7410.23	0.0235294	0.0352941	Junction	FALSE	0.396541	-0.165903
R1_DM	Dmel_rRNA_cistron_	-	+	3769.69	6863.3	0.2	0.588235	Junction	FALSE	0.402032	-0.164664
R1_DM	Dmel_rRNA_cistron_	-	+	4701.27	6313.95	0.0235294	0.0352941	Junction	FALSE	0.951457	-0.0162438
R1_DM	Dmel_rRNA_cistron_	-	+	884.116	6837.04	0.117647	0.141176	Junction	FALSE	0.503341	-0.137866
R1_DM	Dmel_rRNA_cistron_	-	+	4171.15	6877.91	0.117647	0.129412	Junction	FALSE	0.901267	0.0261459
R1_DM	Dmel_rRNA_cistron_	-	+	242.763	6941.29	0.129412	0.141176	Junction	FALSE	0.468912	-0.147535
R1_DM	Dmel_rRNA_cistron_	-	+	41.537	6708.6	0.0235294	0.0705882	Junction	FALSE	0.768691	-0.0606715
R1_DM	Dmel_rRNA_cistron_	-	+	3911.63	6739.62	0.0117647	0.0235294	Junction	FALSE	0.341429	0.184915
R1_DM	Dmel_rRNA_cistron_	-	+	1612.34	6513.94	0.0117647	0.0117647	Junction	FALSE	0.673144	-0.0872545
R1_DM	Dmel_rRNA_cistron_	-	+	1307.7	3770.6	0.0117647	0.0117647	Junction	FALSE	0.5868	-0.112323
R1_DM	Dmel_rRNA_cistron_	-	+	5098.52	3818.48	0.0117647	0.0117647	Junction	FALSE	0.526457	0.131198
R1_DM	Dmel_rRNA_cistron_	-	+	2732.97	6913.57	0.0117647	0.0235294	Junction	FALSE	0.814448	0.0488305
R1_DM	Dmel_rRNA_cistron_	-	+	4999.05	7365.55	0.0117647	0.0117647	Junction	FALSE	0.900422	-0.0263744
R1_DM	Dmel_rRNA_cistron_	-	+	908.629	6223.15	0.0117647	0.0235294	Junction	FALSE	0.576326	-0.115904
R1_DM	Dmel_rRNA_cistron_	-	+	64.4295	7750.66	0.0117647	0.0117647	Junction	FALSE	0.108345	-0.269895
R1_DM	Dmel_rRNA_cistron_	-	+	5006.44	4855.76	0.0117647	0.0117647	Junction	FALSE	0.814448	0.0488305
R1_DM	Dmel_rRNA_cistron_	-	+	4505.33	5976.57	0.0117647	0.0117647	Junction	FALSE	0.814448	0.0488305
R1_DM	Dmel_rRNA_cistron_	-	+	-13.4821	5306.41	0.0352941	0.0823529	Junction	FALSE	0.546398	0.125135
R1_DM	Dmel_rRNA_cistron_	-	+	4474.37	6959.13	0.0352941	0.0352941	Junction	FALSE	0.741591	-0.0671621
R1_DM	Dmel_rRNA_cistron_	-	+	4905.88	7650.45	0.0117647	0.0117647	Junction	FALSE	0.916813	-0.0227932
R1_DM	Dmel_rRNA_cistron_	-	+	1797.43	7074.08	0.0352941	0.0588235	Junction	FALSE	0.345898	0.177543
R1_DM	Dmel_rRNA_cistron_	-	+	725.468	4665.82	0.0117647	0.0117647	Junction	FALSE	0.371497	0.170591
R1_DM	Dmel_rRNA_cistron_	-	+	1656.77	6863.36	0.0470588	0.105882	Junction	FALSE	0.773115	0.0597926
R1_DM	Dmel_rRNA_cistron_	-	+	5082.61	4093.89	0.0117647	0.0117647	Junction	FALSE	0.900422	-0.0263744
R1_DM	Dmel_rRNA_cistron_	-	+	1516.71	4838.46	0.0117647	0.0117647	Junction	FALSE	0.610675	-0.10516
R1_DM	Dmel_rRNA_cistron_	-	+	2783.63	6847.59	0.0588235	0.0705882	Junction	FALSE	0.405337	0.164015
R1_DM	Dmel_rRNA_cistron_	-	+	95.784	7501.9	0.0352941	0.0352941	Junction	FALSE	0.307181	0.198606
R1_DM	Dmel_rRNA_cistron_	-	+	4918.63	3207.37	0.0117647	0.0117647	Junction	FALSE	0.707065	-0.0800921
R1_DM	Dmel_rRNA_cistron_	-	+	2004.11	7937.56	0.0117647	0.0117647	Junction	FALSE	0.900422	-0.0263744
R1_DM	Dmel_rRNA_cistron_	-	+	1760.46	7240.42	0.0117647	0.0117647	Junction	FALSE	0.75906	-0.0621862
R1_DM	Dmel_rRNA_cistron_	-	+	-32.5577	7056.36	0.0470588	0.0470588	Junction	FALSE	0.662809	-0.0901857
R1_DM	Dmel_rRNA_cistron_	-	+	-129.629	7040.12	0.117647	0.117647	Junction	FALSE	0.786887	0.0567522
R1_DM	Dmel_rRNA_cistron_	-	+	4357.67	1531.83	0.0117647	0.0117647	Junction	FALSE	0.895854	-0.0299556
R1_DM	Dmel_rRNA_cistron_	-	+	-139.871	4906.37	0.0117647	0.0117647	Junction	FALSE	0.673144	-0.0872545
R1_DM	Dmel_rRNA_cistron_	-	+	4877.95	7129.53	0.0235294	0.0352941	Junction	FALSE	0.868287	0.036861
R1_DM	Dmel_rRNA_cistron_	-	+	4633.11	7209.27	0.0117647	0.0117647	Junction	FALSE	0.108345	-0.269895
R1_DM	Dmel_rRNA_cistron_	-	+	3328.22	7562.33	0.0117647	0.0117647	Junction	FALSE	0.98536	0.00585629
R1_DM	Dmel_rRNA_cistron_	-	+	897.919	6950.25	0.2	0.235294	Junction	FALSE	0.917737	-0.0225999
R1_DM	Dmel_rRNA_cistron_	-	+	4334.69	6832.85	0.0588235	0.0823529	Junction	FALSE	0.727991	0.0699618
R1_DM	Dmel_rRNA_cistron_	-	+	3803.48	5874.22	0.0117647	0.0117647	Junction	FALSE	0.108345	-0.269895
R1_DM	Dmel_rRNA_cistron_	-	+	-15.8284	1173.18	0.0117647	0.0117647	Junction	FALSE	0.610675	-0.10516
R1_DM	Dmel_rRNA_cistron_	-	+	4977.85	6055.55	0.0117647	0.0117647	Junction	FALSE	0.717681	0.0738988
R1_DM	Dmel_rRNA_cistron_	-	+	897.209	1200.39	0.0117647	0.0117647	Junction	FALSE	0.61711	0.102548
R1_DM	Dmel_rRNA_cistron_	-	+	1086.06	6833.89	0.105882	0.235294	Junction	FALSE	0.474952	-0.1451
R1_DM	Dmel_rRNA_cistron_	-	+	3562.55	6845.59	0.329412	0.635294	Junction	FALSE	0.0228461	0.339335
R1_DM	Dmel_rRNA_cistron_	-	+	330.968	6816.74	0.0588235	0.0588235	Junction	FALSE	0.800685	-0.0538669
R1_DM	Dmel_rRNA_cistron_	-	+	3847.79	6578.09	0.0117647	0.0117647	Junction	FALSE	0.895854	0.0309246
R1_DM	Dmel_rRNA_cistron_	-	+	4861.28	7039.58	0.0470588	0.0470588	Junction	FALSE	0.576326	0.115864
R1_DM	Dmel_rRNA_cistron_	-	+	4792.26	3853.24	0.0117647	0.0117647	Junction	FALSE	0.635294	-0.0979981
R1_DM	Dmel_rRNA_cistron_	-	-	-10.3725	5718.38	0.0117647	0.0117647	Junction	FALSE	0.610675	-0.10516
R1_DM	Dmel_rRNA_cistron_	-	-	2110.98	6898.44	0.0117647	0.0235294	Junction	FALSE	0.483406	0.141941
R1_DM	Dmel_rRNA_cistron_	-	-	4851.14	5398.14	0.0117647	0.0117647	Junction	FALSE	0.341429	-0.180365
R1_DM	Dmel_rRNA_cistron_	-	-	1225.75	6698.08	0.0117647	0.0117647	Junction	FALSE	0.75906	-0.0621862
R1_DM	Dmel_rRNA_cistron_	+	-	5195.78	6893.31	0.0588235	0.0588235	Junction	FALSE	0.505076	-0.137563
R1_DM	Dmel_rRNA_cistron_	+	-	1367.12	3899.38	0.0117647	0.0117647	Junction	FALSE	0.610675	-0.10516
R1_DM	Dmel_rRNA_cistron_	+	-	4906.84	6734.16	0.917647	0.988235	Junction	FALSE	0.895854	0.0299951
R1_DM	Dmel_rRNA_cistron_	+	-	3432.35	7661.87	0.0117647	0.0235294	Junction	FALSE	0.392119	0.16701
R1_DM	Dmel_rRNA_cistron_	+	-	2428.59	3286.63	0.0117647	0.0117647	Junction	FALSE	0.992824	-0.00130608
R1_DM	Dmel_rRNA_cistron_	+	-	5374.37	7717.8	0.0117647	0.0117647	Junction	FALSE	0.673144	-0.0872545
R1_DM	Dmel_rRNA_cistron_	+	-	653.928	6730.74	0.0117647	0.0117647	Junction	FALSE	0.992824	-0.00130608
R1_DM	Dmel_rRNA_cistron_	+	-	5373.24	6881.24	1	103.906	Junction	FALSE	0.106584	-0.273947
R1_DM	Dmel_rRNA_cistron_	+	-	1463.34	3737.88	0.0117647	0.0117647	Junction	FALSE	0.900422	-0.0263744
R1_DM	Dmel_rRNA_cistron_	+	-	3318.75	3421.5	0.0117647	0.0117647	Junction	FALSE	0.717681	-0.0765109
R1_DM	Dmel_rRNA_cistron_	+	-	5356.1	7396.34	0.0117647	0.0117647	Junction	FALSE	0.717681	-0.0729298
R1_DM	Dmel_rRNA_cistron_	+	-	1174.96	3400.04	0.0117647	0.0117647	Junction	FALSE	0.610675	-0.10516
R1_DM	Dmel_rRNA_cistron_	+	-	3579.15	3663.05	0.0117647	0.0117647	Junction	FALSE	0.717681	-0.0765109
R1_DM	Dmel_rRNA_cistron_	+	-	5452.98	3931.35	0.0117647	0.0117647	Junction	FALSE	0.727991	-0.0693486
R1_DM	Dmel_rRNA_cistron_	+	-	5471.31	6720.57	0.211765	0.223529	Junction	FALSE	0.341429	0.184456
R1_DM	Dmel_rRNA_cistron_	+	-	1884.61	6770.64	0.0117647	0.0117647	Junction	FALSE	0.635294	-0.0979981
R1_DM	Dmel_rRNA_cistron_	+	-	2417.08	6862.14	0.0117647	0.0117647	Junction	FALSE	0.635294	-0.0979981
R1_DM	Dmel_rRNA_cistron_	+	-	1048.68	6637.65	0.0235294	0.0235294	Junction	FALSE	0.501621	0.138254
R1_DM	Dmel_rRNA_cistron_	+	-	5115.67	197.993	0.0117647	0.0117647	Junction	FALSE	0.814448	0.0488305
R1_DM	Dmel_rRNA_cistron_	+	-	253.312	6845.35	0.0117647	0.0117647	Junction	FALSE	0.727991	-0.0693486
R1_DM	Dmel_rRNA_cistron_	+	-	631.168	7781.97	0.0470588	0.105882	Junction	FALSE	0.483406	0.142897
R1_DM	Dmel_rRNA_cistron_	+	-	1929.01	7093.18	0.0470588	0.0470588	Junction	FALSE	0.341429	-0.179535
R1_DM	Dmel_rRNA_cistron_	+	-	880.567	7091.43	0.0117647	0.0235294	Junction	FALSE	0.963891	0.0130187
R1_DM	Dmel_rRNA_cistron_	+	-	2195.5	2485.03	0.305882	0.317647	Junction	FALSE	0.593037	-0.110953
R1_DM	Dmel_rRNA_cistron_	+	-	1523.41	6837.09	0.0117647	0.0117647	Junction	FALSE	0.341429	-0.180365
R1_DM	Dmel_rRNA_cistron_	+	-	5503.96	6673.13	0.2	0.2	Junction	FALSE	0.576326	-0.119897
R1_DM	Dmel_rRNA_cistron_	+	-	4290.61	7113.83	0.0117647	0.0117647	Junction	FALSE	0.75906	-0.0621862
R1_DM	Dmel_rRNA_cistron_	+	-	5512.05	7288.62	0.0117647	0.0117647	Junction	FALSE	0.717681	-0.0729298
R1_DM	Dmel_rRNA_cistron_	+	-	5443.7	6786.25	0.411765	0.470588	Junction	FALSE	0.87712	0.0353301
R1_DM	Dmel_rRNA_cistron_	+	-	4346.08	7574.88	0.0705882	0.0705882	Junction	FALSE	0.210902	0.228867
R1_DM	Dmel_rRNA_cistron_	+	-	5377.64	7056.7	0.741176	0.788235	Junction	FALSE	0.0938951	0.281577
R1_DM	Dmel_rRNA_cistron_	+	-	3023.75	6904.03	0.0117647	0.0117647	Junction	FALSE	0.717681	-0.0765109
R1_DM	Dmel_rRNA_cistron_	+	-	2042.27	7672.73	0.0117647	0.0117647	Junction	FALSE	0.474952	0.145522
R1_DM	Dmel_rRNA_cistron_	+	-	3630.06	7091.27	0.0117647	0.0117647	Junction	FALSE	0.900422	-0.0263744
R1_DM	Dmel_rRNA_cistron_	+	-	1595.63	6223.99	0.0235294	0.0235294	Junction	FALSE	0.576326	-0.116495
R1_DM	Dmel_rRNA_cistron_	+	+	4192.32	6773.72	0.0235294	0.0235294	Junction	FALSE	0.22584	0.224868
R1_DM	Dmel_rRNA_cistron_	+	+	1841.55	6844.69	0.0117647	0.0235294	Junction	FALSE	0.75906	-0.0621862
R1_DM	Dmel_rRNA_cistron_	+	+	5423.67	6842.48	0.0352941	0.0352941	Junction	FALSE	0.812173	0.0521196
R1_DM	NINJA_I	+	+	1814.57	1599.16	0.329412	0.352941	Junction	FALSE	0.301992	-0.202292
R1_DM	TRANSPAC_LTR	+	+	5055.87	362.038	0.0235294	0.0235294	Junction	FALSE	0.671518	-0.0884728
R1_DM	I_DM	+	-	2664.65	1145.35	0.0117647	0.0117647	Junction	FALSE	0.727991	-0.0693486
R1_DM	I_DM	+	-	2422.06	927.938	0.0117647	0.0117647	Junction	FALSE	0.727991	-0.0693486
R1_DM	I_DM	+	+	3222.27	5374.27	0.0117647	0.0117647	Junction	FALSE	0.992824	0.00227511
R1_DM	I_DM	+	+	5427.64	5448.76	0.0117647	0.0117647	Junction	FALSE	0.707065	-0.0800921
R1_DM	2L	-	+	4995.55	2.21807e+07	0.729412	0.729412	Junction	FALSE	0.998706	0.000337444
R1_DM	2L	-	+	4273.15	1.11909e+07	0.0117647	0.0117647	Junction	FALSE	0.426165	0.156266
R1_DM	2L	-	+	4740.6	2.21805e+07	0.717647	0.717647	Junction	FALSE	0.519744	-0.13489
R1_DM	2L	-	+	1612.88	2.52028e+06	0.0117647	0.0117647	Junction	FALSE	0.639045	0.0953859
R1_DM	2L	-	+	3080.96	4.169e+06	0.0117647	0.0117647	Junction	FALSE	0.341429	0.184915
R1_DM	2L	-	+	5063.2	4.63997e+06	0.0117647	0.0117647	Junction	FALSE	0.690368	-0.0836733
R1_DM	2L	-	+	4948.57	1.71981e+07	0.0117647	0.0117647	Junction	FALSE	0.532836	0.127617
R1_DM	2L	-	+	1743.61	1.62012e+07	0.0117647	0.0117647	Junction	FALSE	0.526457	0.131198
R1_DM	2L	-	-	3864.23	341560	0.0117647	0.0117647	Junction	FALSE	0.992824	0.00227511
R1_DM	2L	-	-	3669.23	1.43891e+07	0.0117647	0.0117647	Junction	FALSE	0.992824	0.00227511
R1_DM	2L	+	-	5396.16	2.21811e+07	0.776471	0.776471	Junction	FALSE	0.327123	-0.191
R1_DM	2L	+	-	5115.2	2.21811e+07	0.0588235	0.0588235	Junction	FALSE	0.982129	0.00849513
R1_DM	2L	+	-	5367.97	2.21814e+07	0.0352941	0.0352941	Junction	FALSE	0.576326	0.119085
R1_DM	2L	+	-	5119.42	2.21809e+07	0.741176	0.741176	Junction	FALSE	0.5868	-0.113709
R1_DM	2L	+	-	5380.32	2.21813e+07	0.0705882	0.0705882	Junction	FALSE	0.210902	0.228867
R1_DM	2L	+	-	5419.43	1.71982e+07	0.0117647	0.0117647	Junction	FALSE	0.532836	0.127617
R1_DM	2L	+	-	5369.49	1.62012e+07	0.0117647	0.0117647	Junction	FALSE	0.526457	0.131198
R1_DM	2L	+	-	5156.6	2.21813e+07	0.0235294	0.0235294	Junction	FALSE	0.864879	0.0389016
R1_DM	2L	+	-	5364.68	1.1191e+07	0.0117647	0.0117647	Junction	FALSE	0.426165	0.156266
R1_DM	2L	+	-	5119.6	2.21818e+07	0.0117647	0.0117647	Junction	FALSE	0.426165	0.156266
R1_DM	2L	+	-	5367.3	2.5203e+06	0.0117647	0.0117647	Junction	FALSE	0.639045	0.0953859
R1_DM	2L	+	-	5424.8	4.64012e+06	0.0117647	0.0117647	Junction	FALSE	0.690368	-0.0836733
R1_DM	2L	+	-	5382.54	4.16908e+06	0.0117647	0.0117647	Junction	FALSE	0.341429	0.184915
R1_DM	2L	+	+	5386.27	1.5941e+07	0.0117647	0.0117647	Junction	FALSE	0.474952	0.145522
R1_DM	2L	+	+	5470.18	2.27464e+07	0.0117647	0.0117647	Junction	FALSE	0.639045	-0.0944169
R1_DM	2L	+	+	5351.19	1.43891e+07	0.0117647	0.0117647	Junction	FALSE	0.992824	0.00227511
R1_DM	X	-	+	4782.92	1.06951e+07	0.0352941	0.0352941	Junction	FALSE	0.341429	0.179772
R1_DM	X	-	+	3758.58	1.09271e+06	0.0117647	0.0117647	Junction	FALSE	0.61711	0.102548
R1_DM	X	-	+	-83.7833	551516	0.0117647	0.0117647	Junction	FALSE	0.341429	0.181334
R1_DM	X	-	-	-6.27602	7.89961e+06	0.0117647	0.0117647	Junction	FALSE	0.526457	0.131198
R1_DM	X	-	-	5006.48	4.52039e+06	0.0117647	0.0117647	Junction	FALSE	0.108345	-0.269895
R1_DM	X	+	-	5311.28	559044	0.0117647	0.0117647	Junction	FALSE	0.341429	0.181334
R1_DM	X	+	-	2386.09	2.23993e+07	0.0941176	0.0941176	Junction	FALSE	0.635294	0.0979695
R1_DM	X	+	-	5458.91	1.06952e+07	0.0352941	0.0352941	Junction	FALSE	0.341429	0.179772
R1_DM	X	+	-	2288.94	2.23986e+07	0.0117647	0.0117647	Junction	FALSE	0.483406	0.141941
R1_DM	X	+	-	5406	1.09277e+06	0.0117647	0.0117647	Junction	FALSE	0.61711	0.102548
R1_DM	X	+	+	2090.88	2.2372e+07	0.0588235	0.0588235	Junction	FALSE	0.867035	-0.0374558
R1_DM	X	+	+	5244.97	4.52034e+06	0.0117647	0.0117647	Junction	FALSE	0.108345	-0.269895
R1_DM	STALKER4_I	-	+	1426.18	6683.38	0.0352941	0.0352941	Junction	FALSE	0.717681	-0.0776254
R1_DM	STALKER4_I	-	+	53.9623	3505.15	0.0117647	0.0117647	Junction	FALSE	0.576326	-0.115904
R1_DM	STALKER4_I	-	-	1299.43	1146.17	0.0470588	0.0588235	Junction	FALSE	0.529223	0.129471
R1_DM	STALKER4_I	+	-	4366.52	3966.73	0.870588	0.870588	Junction	FALSE	0.527469	0.13001
R1_DM	STALKER4_I	+	-	3678.84	4163.86	0.788235	1.15294	Junction	FALSE	0.420974	0.159038
R1_DM	STALKER4_I	+	-	3501.85	4683.49	0.0117647	0.0117647	Junction	FALSE	0.639045	-0.0944169
R1_DM	STALKER4_I	+	+	2393.84	4274.75	0.0823529	0.0823529	Junction	FALSE	0.14398	0.253466
R1_DM	STALKER4_I	+	+	5009.2	6701.32	0.388235	0.388235	Junction	FALSE	0.0315274	0.327998
R1_DM	STALKER4_I	+	+	275.052	4421.84	0.0941176	0.0941176	Junction	FALSE	0.961614	-0.0144379
R1_DM	STALKER4_I	+	+	511.082	6308.28	0.0117647	0.0117647	Junction	FALSE	0.838695	-0.0442803
R1_DM	STALKER4_LTR	-	+	3093.83	388.317	0.729412	0.8	Junction	FALSE	0.237626	0.218262
R1_DM	STALKER4_LTR	-	+	1534.66	361.246	0.717647	1.02353	Junction	FALSE	0.307181	0.199345
R1_DM	STALKER4_LTR	-	+	1220.16	512.039	0.505882	0.505882	Junction	FALSE	0.11684	-0.265439
R1_DM	STALKER4_LTR	-	+	1262.09	408.222	0.517647	0.541176	Junction	FALSE	0.78243	-0.0573923
R1_DM	STALKER4_LTR	-	+	3305.95	539.862	0.305882	0.305882	Junction	FALSE	0.101597	0.27698
R1_DM	STALKER4_LTR	-	+	2467.65	380.299	0.0823529	0.0823529	Junction	FALSE	0.14398	0.253466
R1_DM	STALKER4_LTR	-	+	3633.12	348.284	0.0117647	0.0117647	Junction	FALSE	0.526457	0.131198
R1_DM	STALKER4_LTR	-	-	4278.34	4.60448	0.117647	0.117647	Junction	FALSE	0.0963636	-0.280024
R1_DM	STALKER4_LTR	-	-	4402.27	-8.32988	1	1.87059	Junction	FALSE	0.75906	0.062318
R1_DM	STALKER4_LTR	-	-	3705.32	49.8496	0.0705882	0.0705882	Junction	FALSE	0.0221658	-0.340994
R1_DM	STALKER4_LTR	-	-	3641.49	-13.4189	0.0823529	0.105882	Junction	FALSE	0.0776687	-0.29056
R1_DM	STALKER4_LTR	-	-	-55.1128	-68.4639	0.0823529	0.0823529	Junction	FALSE	0.0408896	-0.316824
R1_DM	STALKER4_LTR	-	-	3145.13	133.682	0.0588235	0.0588235	Junction	FALSE	0.0566903	-0.304956
R1_DM	STALKER4_LTR	-	-	-100.053	-114.253	0.0117647	0.0117647	Junction	FALSE	0.5868	0.113292
R1_DM	STALKER4_LTR	+	-	3134.12	-7.4217	0.8	0.894118	Junction	FALSE	0.206737	0.231067
R1_DM	STALKER4_LTR	+	-	1555.82	-26.1282	0.929412	1.10588	Junction	FALSE	0.610675	0.105062
R1_DM	STALKER4_LTR	+	-	1322.02	56.2339	0.0117647	0.0117647	Junction	FALSE	0.992824	0.00227511
R1_DM	STALKER4_LTR	+	-	3672.65	-33.651	0.0117647	0.0235294	Junction	FALSE	0.526457	0.131198
R1_DM	STALKER4_LTR	+	+	1570.45	421.441	0.988235	1.65882	Junction	FALSE	0.019246	0.346384
R1_DM	STALKER4_LTR	+	+	3272.38	445.432	0.0823529	0.0823529	Junction	FALSE	0.0408896	-0.316824
R1_DM	STALKER4_LTR	+	+	4418.8	408.246	1	1.92941	Junction	FALSE	0.717681	-0.0764602
R1_DM	STALKER4_LTR	+	+	3658.12	427.915	0.717647	2.55294	Junction	FALSE	0.0177048	0.350105
R1_DM	STALKER4_LTR	+	+	4277.4	430.188	0.117647	0.141176	Junction	FALSE	0.0938951	-0.281785
R1_DM	Circe_LTR	-	+	936.512	305.551	0.0470588	0.0470588	Junction	FALSE	0.307181	0.196096
R1_DM	Circe_LTR	-	-	3774.05	-140.642	0.752941	0.752941	Junction	FALSE	0.849731	0.0426688
R1_DM	Circe_LTR	-	-	3038.63	-96.3867	0.505882	0.505882	Junction	FALSE	0.153346	0.250483
R1_DM	Circe_LTR	-	-	2281.02	-90.163	0.0705882	0.0705882	Junction	FALSE	0.39578	-0.166116
R1_DM	Circe_LTR	-	-	2926.51	-45.9506	0.847059	1.05882	Junction	FALSE	0.836334	0.0449303
R1_DM	Circe_LTR	-	-	2746.9	-76.0968	0.0117647	0.0117647	Junction	FALSE	0.426165	0.156266
R1_DM	Circe_LTR	-	-	2131.49	-131.01	0.0117647	0.0117647	Junction	FALSE	0.741591	0.0667364
R1_DM	Circe_LTR	+	+	542.774	344.424	0.964706	1.17647	Junction	FALSE	0.517216	0.135285
R1_DM	Circe_LTR	+	+	1064.8	364.745	0.552941	0.552941	Junction	FALSE	0.779444	-0.0583584
R1_DM	Circe_LTR	+	+	923.303	267.203	0.0588235	0.0588235	Junction	FALSE	0.237626	0.218557
R1_DM	Circe_LTR	+	+	1348.89	322.391	0.0235294	0.0235294	Junction	FALSE	0.952128	0.0159743
R1_DM	Circe_LTR	+	+	1456.48	346.475	0.0235294	0.0235294	Junction	FALSE	0.722282	0.072019
R1_DM	STALKER2_I	-	+	493.072	3275.43	0.0235294	0.0235294	Junction	FALSE	0.526457	0.130611
R1_DM	STALKER2_I	-	+	508.288	2528.38	0.0117647	0.0117647	Junction	FALSE	0.717681	-0.0729298
R1_DM	STALKER2_I	-	-	1455.09	157.484	0.529412	0.529412	Junction	FALSE	0.307181	0.199276
R1_DM	STALKER2_I	+	+	2507.91	4454.92	0.0705882	0.0705882	Junction	FALSE	0.210902	0.228867
R1_DM	STALKER2_I	+	+	5323.97	3299.53	0.0352941	0.0352941	Junction	FALSE	0.341429	-0.184351
R1_DM	STALKER2_I	+	+	249.361	4749.86	0.0117647	0.0117647	Junction	FALSE	0.341429	-0.180365
R1_DM	STALKER2_I	+	+	5059.25	3501.57	0.0470588	0.0470588	Junction	FALSE	0.341429	-0.179535
R1_DM	BEL_LTR	-	-	4761.66	-165.138	0.0588235	0.0588235	Junction	FALSE	0.0177048	0.349845
R1_DM	BEL_LTR	-	-	347.611	44.8109	0.0117647	0.0117647	Junction	FALSE	0.576326	-0.115904
R1_DM	BEL_LTR	+	+	5488.59	488.256	0.0117647	0.0117647	Junction	FALSE	0.576326	-0.115904
R1_DM	BEL_LTR	+	+	279.989	329.989	0.0117647	0.0117647	Junction	FALSE	0.576326	-0.115904
R1_DM	NOMAD_I	+	+	1015.49	5874.03	0.0588235	0.0588235	Junction	FALSE	0.982129	0.00849513
R1_DM	NOMAD_I	+	+	2375.67	5877.71	0.0823529	0.0823529	Junction	FALSE	0.814448	0.0497909
R1_DM	MAX_LTR	-	-	4975.99	-100.385	0.0117647	0.0117647	Junction	FALSE	0.741591	0.0667364
R1_DM	MAX_LTR	-	-	20.2533	-53.2288	0.0235294	0.0235294	Junction	FALSE	0.633131	0.100041
R1_DM	MAX_LTR	+	+	4805.72	398.01	0.0117647	0.0117647	Junction	FALSE	0.741591	0.0667364
R1_DM	MAX_LTR	+	+	5502.64	381.394	0.0117647	0.0117647	Junction	FALSE	0.98536	0.00585629
R1_DM	MAX_LTR	+	+	5389.32	296.983	0.0117647	0.0117647	Junction	FALSE	0.895854	0.0309246
R1_DM	ACCORD2_LTR	-	+	3163.76	271.739	0.0117647	0.0117647	Junction	FALSE	0.341429	-0.180365
R1_DM	ACCORD2_LTR	-	+	2395.47	363.535	0.0235294	0.0235294	Junction	FALSE	0.69163	-0.0833778
R1_DM	ACCORD2_LTR	-	-	1454.28	-96.7674	0.0352941	0.0352941	Junction	FALSE	0.635294	0.0981581
R1_DM	ACCORD2_LTR	+	-	1785.7	-111.986	0.164706	0.164706	Junction	FALSE	0.18896	-0.23747
R1_DM	ACCORD2_LTR	+	-	1726.56	-88.7024	0.152941	0.152941	Junction	FALSE	0.472034	-0.146699
R1_DM	ACCORD2_LTR	+	-	2552.84	-136.675	0.0117647	0.0117647	Junction	FALSE	0.371497	0.170591
R1_DM	ACCORD2_LTR	+	-	2492.57	-69.1538	0.0470588	0.0470588	Junction	FALSE	0.610675	0.106747
R1_DM	INVADER3_I	-	-	2927.36	1353.6	0.0705882	0.0705882	Junction	FALSE	0.717681	0.0781098
R1_DM	INVADER3_I	-	-	2704.59	1591.67	0.0352941	0.0352941	Junction	FALSE	0.948221	-0.0169382
R1_DM	INVADER3_I	+	+	5397.42	1399.83	0.0470588	0.0470588	Junction	FALSE	0.717681	0.0757482
R1_DM	INVADER3_I	+	+	5021.96	1328.4	0.0117647	0.0117647	Junction	FALSE	0.639045	-0.0944169
R1_DM	ACCORD_LTR	-	+	2388.99	458.218	0.682353	0.729412	Junction	FALSE	0.576326	0.119977
R1_DM	ACCORD_LTR	-	+	2521.83	659.81	0.223529	0.223529	Junction	FALSE	0.562153	0.122412
R1_DM	ACCORD_LTR	-	-	509.056	-86.1238	0.105882	0.105882	Junction	FALSE	0.900422	-0.027964
R1_DM	ACCORD_LTR	+	-	2439.17	26.7241	0.8	0.835294	Junction	FALSE	0.241308	0.216751
R1_DM	ACCORD_LTR	+	+	2973.62	675.504	0.305882	0.305882	Junction	FALSE	0.507822	0.137031
R1_DM	ACCORD_LTR	+	+	1610.15	699.178	0.117647	0.117647	Junction	FALSE	0.104602	-0.27523
R1_DM	ACCORD_LTR	+	+	1898.93	505.713	0.141176	0.141176	Junction	FALSE	0.0884077	-0.285419
R1_DM	STALKER2_LTR	-	+	3112.68	408.966	0.152941	0.164706	Junction	FALSE	0.483406	0.142279
R1_DM	STALKER2_LTR	-	+	2249.17	423.324	0.0588235	0.0823529	Junction	FALSE	0.526457	-0.130726
R1_DM	STALKER2_LTR	-	+	5087.41	514.958	0.0588235	0.0588235	Junction	FALSE	0.183792	0.239891
R1_DM	STALKER2_LTR	-	+	4208.68	351.719	0.0117647	0.0117647	Junction	FALSE	0.75906	-0.0621862
R1_DM	STALKER2_LTR	-	+	1815.86	424.275	0.0823529	0.0823529	Junction	FALSE	0.0408896	-0.316824
R1_DM	STALKER2_LTR	-	+	1359.24	424.902	0.0117647	0.0117647	Junction	FALSE	0.98536	0.00585629
R1_DM	STALKER2_LTR	-	+	1182.37	458.923	0.0470588	0.0470588	Junction	FALSE	0.662809	-0.0901857
R1_DM	STALKER2_LTR	-	+	2074.24	436.764	0.0117647	0.0117647	Junction	FALSE	0.717681	0.0738988
R1_DM	STALKER2_LTR	-	+	784.529	432.241	0.0117647	0.0117647	Junction	FALSE	0.98536	0.00585629
R1_DM	STALKER2_LTR	-	+	4767.86	374.41	0.0823529	0.0823529	Junction	FALSE	0.294873	0.204303
R1_DM	STALKER2_LTR	-	+	2706.2	434.718	0.0352941	0.0352941	Junction	FALSE	0.663561	0.0897874
R1_DM	STALKER2_LTR	-	+	4379.81	434.288	0.0117647	0.0117647	Junction	FALSE	0.98536	0.00585629
R1_DM	STALKER2_LTR	-	+	909.931	402.469	0.0117647	0.0117647	Junction	FALSE	0.864879	0.0380869
R1_DM	STALKER2_LTR	-	-	1372.61	17.508	0.0235294	0.0235294	Junction	FALSE	0.345898	-0.177635
R1_DM	STALKER2_LTR	-	-	-63.5292	1.69303	0.0117647	0.0117647	Junction	FALSE	0.746443	-0.0657674
R1_DM	STALKER2_LTR	-	-	1714.49	37.2383	0.0117647	0.0117647	Junction	FALSE	0.794085	-0.0550238
R1_DM	STALKER2_LTR	-	-	-106.561	-148.754	0.0823529	0.0823529	Junction	FALSE	0.241308	-0.217094
R1_DM	STALKER2_LTR	-	-	2059.38	-19.6243	0.0823529	0.0823529	Junction	FALSE	0.14398	0.253466
R1_DM	STALKER2_LTR	-	-	1635.82	8.66658	0.0588235	0.0705882	Junction	FALSE	0.393006	0.166601
R1_DM	STALKER2_LTR	-	-	2822.56	75.2483	0.0588235	0.0588235	Junction	FALSE	0.0566903	-0.304956
R1_DM	STALKER2_LTR	-	-	3970.75	-10.5191	0.0117647	0.0117647	Junction	FALSE	0.75906	-0.0621862
R1_DM	STALKER2_LTR	-	-	5019.99	83.5365	0.129412	0.129412	Junction	FALSE	0.0923579	-0.283015
R1_DM	STALKER2_LTR	-	-	262.71	33.1453	0.211765	0.235294	Junction	FALSE	0.893656	0.0329915
R1_DM	STALKER2_LTR	-	-	-60.2704	-120.77	0.0352941	0.0352941	Junction	FALSE	0.341429	-0.184351
R1_DM	STALKER2_LTR	-	-	3308.67	-3.12745	0.0823529	0.105882	Junction	FALSE	0.241308	0.217157
R1_DM	STALKER2_LTR	-	-	2545.82	5.99594	0.0588235	0.0941176	Junction	FALSE	0.101597	0.276892
R1_DM	STALKER2_LTR	-	-	911.779	25.1674	0.0705882	0.0823529	Junction	FALSE	0.307181	0.199261
R1_DM	STALKER2_LTR	-	-	5054.92	159.797	0.0117647	0.0117647	Junction	FALSE	0.537373	-0.126648
R1_DM	STALKER2_LTR	-	-	2965.34	-58.7828	0.0352941	0.0352941	Junction	FALSE	0.490709	-0.140405
R1_DM	STALKER2_LTR	+	-	4836.42	30.1226	0.0823529	0.0823529	Junction	FALSE	0.14398	0.253466
R1_DM	STALKER2_LTR	+	-	3088.02	26.8214	0.141176	0.164706	Junction	FALSE	0.688894	0.0843775
R1_DM	STALKER2_LTR	+	-	954.369	53.1307	0.0117647	0.0117647	Junction	FALSE	0.864879	0.0380869
R1_DM	STALKER2_LTR	+	-	1875.53	72.0339	0.0588235	0.0588235	Junction	FALSE	0.233932	-0.22126
R1_DM	STALKER2_LTR	+	-	1458.31	-10.3128	0.0117647	0.0117647	Junction	FALSE	0.98536	0.00585629
R1_DM	STALKER2_LTR	+	-	1669.53	-131.231	0.0235294	0.0235294	Junction	FALSE	0.181763	-0.241322
R1_DM	STALKER2_LTR	+	-	1140.79	12.874	0.0470588	0.0588235	Junction	FALSE	0.814448	-0.049249
R1_DM	STALKER2_LTR	+	-	2246.81	1.1552	0.0588235	0.0705882	Junction	FALSE	0.717681	-0.0739656
R1_DM	STALKER2_LTR	+	-	2013.76	-35.5974	0.0117647	0.0117647	Junction	FALSE	0.717681	0.0738988
R1_DM	STALKER2_LTR	+	-	2695.2	14.6231	0.0352941	0.0352941	Junction	FALSE	0.663561	0.0897874
R1_DM	STALKER2_LTR	+	-	864.894	78.8555	0.0117647	0.0117647	Junction	FALSE	0.98536	0.00585629
R1_DM	STALKER2_LTR	+	-	4272.39	4.88093	0.0117647	0.0117647	Junction	FALSE	0.75906	-0.0621862
R1_DM	STALKER2_LTR	+	-	4389.06	12.3747	0.0117647	0.0117647	Junction	FALSE	0.98536	0.00585629
R1_DM	STALKER2_LTR	+	+	3223.55	406.101	0.0588235	0.0588235	Junction	FALSE	0.198394	0.234968
R1_DM	STALKER2_LTR	+	+	2912.85	402.587	0.0823529	0.0823529	Junction	FALSE	0.0408896	-0.316824
R1_DM	STALKER2_LTR	+	+	5091.03	425.737	0.129412	0.129412	Junction	FALSE	0.0923579	-0.283015
R1_DM	STALKER2_LTR	+	+	2029.4	432.318	0.0823529	0.0823529	Junction	FALSE	0.14398	0.253466
R1_DM	STALKER2_LTR	+	+	5504.46	574.171	0.0823529	0.0823529	Junction	FALSE	0.758249	-0.0639862
R1_DM	STALKER2_LTR	+	+	2574.19	389.742	0.0588235	0.0705882	Junction	FALSE	0.356362	0.175655
R1_DM	STALKER2_LTR	+	+	2547.15	514.079	0.0705882	0.0705882	Junction	FALSE	0.188644	0.237912
R1_DM	STALKER2_LTR	+	+	955.926	403.734	0.0705882	0.0705882	Junction	FALSE	0.241308	0.216806
R1_DM	STALKER2_LTR	+	+	3431.44	292.062	0.0705882	0.0705882	Junction	FALSE	0.210902	0.228867
R1_DM	STALKER2_LTR	+	+	1568.65	462.404	0.0235294	0.0235294	Junction	FALSE	0.203092	0.232511
R1_DM	STALKER2_LTR	+	+	377.163	334.704	0.211765	0.211765	Junction	FALSE	0.653116	0.0920893
R1_DM	STALKER2_LTR	+	+	1686.93	382.184	0.0588235	0.0588235	Junction	FALSE	0.447778	0.151271
R1_DM	STALKER2_LTR	+	+	1518.68	282.684	0.0235294	0.0235294	Junction	FALSE	0.345898	-0.177635
R1_DM	STALKER2_LTR	+	+	1299.64	404.976	0.0235294	0.0235294	Junction	FALSE	0.345898	-0.177635
R1_DM	STALKER2_LTR	+	+	5361.08	365.085	0.0117647	0.0117647	Junction	FALSE	0.746443	-0.0657674
R1_DM	STALKER2_LTR	+	+	1732.39	427.762	0.0117647	0.0117647	Junction	FALSE	0.794085	-0.0550238
R1_DM	STALKER2_LTR	+	+	3959.07	419.842	0.0117647	0.0117647	Junction	FALSE	0.75906	-0.0621862
R1_DM	COPIA_I_DM	-	+	-43.121	4713.37	0.0117647	0.0117647	Junction	FALSE	0.576326	-0.115904
R1_DM	COPIA_I_DM	-	+	4724.38	4718.12	0.0352941	0.0352941	Junction	FALSE	0.332681	-0.188536
R1_DM	COPIA_I_DM	-	+	5113.63	2569.37	0.0117647	0.0117647	Junction	FALSE	0.864879	0.0380869
R1_DM	COPIA_I_DM	-	-	4883.76	1338.38	0.0117647	0.0117647	Junction	FALSE	0.864879	0.0380869
R1_DM	COPIA_I_DM	-	-	242.903	-142.097	0.0117647	0.0117647	Junction	FALSE	0.717681	0.0738988
R1_DM	COPIA_I_DM	+	-	5032.06	-128.507	0.0352941	0.0352941	Junction	FALSE	0.332681	-0.188536
R1_DM	COPIA_I_DM	+	-	295.038	-109.371	0.0117647	0.0117647	Junction	FALSE	0.576326	-0.115904
R1_DM	COPIA_I_DM	+	-	5529.23	-174.227	0.0117647	0.0117647	Junction	FALSE	0.474952	-0.144553
R1_DM	3R	-	+	-27.9746	902590	0.188235	0.2	Junction	FALSE	0.800685	0.0539009
R1_DM	3R	-	+	32.454	2.66914e+07	0.0117647	0.0117647	Junction	FALSE	0.639045	0.0953859
R1_DM	3R	-	+	1370.46	1.26199e+07	0.0117647	0.0117647	Junction	FALSE	0.61711	0.102548
R1_DM	3R	-	+	4967.34	4.6096e+06	0.0117647	0.0117647	Junction	FALSE	0.814448	0.0488305
R1_DM	3R	-	+	4892.61	2.66914e+07	0.0117647	0.0117647	Junction	FALSE	0.420974	-0.158878
R1_DM	3R	-	+	3940.24	2.66914e+07	0.0117647	0.0117647	Junction	FALSE	0.992824	-0.00130608
R1_DM	3R	-	+	4298.24	2.29842e+07	0.0117647	0.0235294	Junction	FALSE	0.108345	-0.269895
R1_DM	3R	-	+	3008.94	1.09211e+07	0.0117647	0.0117647	Junction	FALSE	0.474952	-0.144553
R1_DM	3R	-	+	4254.72	2.39112e+07	0.0117647	0.0117647	Junction	FALSE	0.653116	0.0918047
R1_DM	3R	-	-	3873.9	2.92922e+07	0.0117647	0.0117647	Junction	FALSE	0.426165	0.156266
R1_DM	3R	-	-	1543.33	177912	0.211765	0.211765	Junction	FALSE	0.717681	0.0750769
R1_DM	3R	-	-	3657.74	2.92923e+07	0.0117647	0.0117647	Junction	FALSE	0.426165	0.156266
R1_DM	3R	-	-	5054.41	1.41396e+07	0.0588235	0.0588235	Junction	FALSE	0.990742	-0.00463371
R1_DM	3R	-	-	-29.0766	5.14296e+06	0.0117647	0.0117647	Junction	FALSE	0.717681	0.0738988
R1_DM	3R	-	-	4918.31	2.84639e+07	0.0117647	0.0117647	Junction	FALSE	0.526457	-0.130229
R1_DM	3R	+	-	5363.02	2.39112e+07	0.0117647	0.0117647	Junction	FALSE	0.653116	0.0918047
R1_DM	3R	+	-	5379.63	902604	0.188235	0.188235	Junction	FALSE	0.717681	0.0742499
R1_DM	3R	+	-	5425.9	2.66914e+07	0.0352941	0.0352941	Junction	FALSE	0.866087	-0.0378648
R1_DM	3R	+	-	5314.69	2.29842e+07	0.0117647	0.0117647	Junction	FALSE	0.108345	-0.269895
R1_DM	3R	+	-	5371.99	1.262e+07	0.0117647	0.0117647	Junction	FALSE	0.61711	0.102548
R1_DM	3R	+	-	5354.39	1.09211e+07	0.0117647	0.0117647	Junction	FALSE	0.474952	-0.144553
R1_DM	3R	+	+	5293.45	5.14304e+06	0.0117647	0.0117647	Junction	FALSE	0.717681	0.0738988
R1_DM	3R	+	+	5472.87	1.41394e+07	0.0588235	0.0588235	Junction	FALSE	0.980392	-0.00955702
R1_DM	3R	+	+	5338.49	2.92923e+07	0.0235294	0.0235294	Junction	FALSE	0.183792	0.240153
R1_DM	PROTOP	-	+	240.357	4538.74	0.670588	0.694118	Junction	FALSE	0.517216	0.135325
R1_DM	PROTOP	-	+	180.625	4381.5	0.0235294	0.0235294	Junction	FALSE	0.340665	0.186656
R1_DM	PROTOP	-	-	739.313	177.858	0.329412	0.364706	Junction	FALSE	0.0720412	-0.293788
R1_DM	PROTOP	-	-	1927.82	121.825	0.0117647	0.0117647	Junction	FALSE	0.371497	0.170591
R1_DM	PROTOP	-	-	-42.0539	-12.4539	0.0117647	0.0117647	Junction	FALSE	0.441207	0.152685
R1_DM	PROTOP	+	-	4308.25	2363.5	0.0117647	0.0117647	Junction	FALSE	0.963891	0.0130187
R1_DM	PROTOP	+	-	331.133	47.6166	0.0117647	0.0117647	Junction	FALSE	0.392119	0.16701
R1_DM	PROTOP	+	-	5505.38	-163.05	0.0117647	0.0117647	Junction	FALSE	0.392119	0.16701
R1_DM	PROTOP	+	+	2292.81	4645.78	0.141176	0.141176	Junction	FALSE	0.484974	0.141529
R1_DM	PROTOP	+	+	1985.16	4502.73	0.0235294	0.0235294	Junction	FALSE	0.303401	0.201941
R1_DM	PROTOP	+	+	4190.99	4473.39	0.0117647	0.0117647	Junction	FALSE	0.61711	0.102548
R1_DM	ROO_LTR	-	+	5068.74	292.694	0.0470588	0.0470588	Junction	FALSE	0.341429	-0.179535
R1_DM	ROO_LTR	-	+	4515.77	495.339	0.0352941	0.0470588	Junction	FALSE	0.5868	-0.112909
R1_DM	ROO_LTR	-	+	2036.11	437.227	0.0117647	0.0117647	Junction	FALSE	0.900422	-0.0263744
R1_DM	ROO_LTR	-	+	3487.77	443.727	0.0117647	0.0117647	Junction	FALSE	0.474952	-0.144553
R1_DM	ROO_LTR	-	+	3441.44	474.894	0.0117647	0.0117647	Junction	FALSE	0.900422	-0.0263744
R1_DM	ROO_LTR	-	+	-152.41	557.285	0.0235294	0.0235294	Junction	FALSE	0.233932	0.219773
R1_DM	ROO_LTR	-	+	3290.14	441.641	0.0352941	0.0352941	Junction	FALSE	0.777692	-0.0587914
R1_DM	ROO_LTR	-	+	2558.12	405.596	0.0117647	0.0117647	Junction	FALSE	0.341429	-0.180365
R1_DM	ROO_LTR	-	+	1068.26	371.137	0.0117647	0.0117647	Junction	FALSE	0.483406	0.141941
R1_DM	ROO_LTR	-	+	1285.22	509.694	0.0470588	0.0470588	Junction	FALSE	0.341429	-0.179535
R1_DM	ROO_LTR	-	+	3171.15	556.851	0.0117647	0.0117647	Junction	FALSE	0.900422	-0.0263744
R1_DM	ROO_LTR	-	-	1611.56	15.1905	0.0470588	0.0470588	Junction	FALSE	0.426165	0.15598
R1_DM	ROO_LTR	-	-	2013.3	3.70545	0.0235294	0.0235294	Junction	FALSE	0.319195	-0.19292
R1_DM	ROO_LTR	-	-	4671.41	-147.586	0.0117647	0.0117647	Junction	FALSE	0.75906	-0.0621862
R1_DM	ROO_LTR	-	-	3437.91	-12.586	0.0117647	0.0117647	Junction	FALSE	0.639045	-0.0944169
R1_DM	ROO_LTR	-	-	1735.2	87.7013	0.0117647	0.0117647	Junction	FALSE	0.690368	-0.0836733
R1_DM	ROO_LTR	-	-	-163.343	-133.426	0.0235294	0.0235294	Junction	FALSE	0.972869	0.0108793
R1_DM	ROO_LTR	-	-	1034	56.7524	0.0117647	0.0117647	Junction	FALSE	0.963891	0.0130187
R1_DM	ROO_LTR	-	-	3937.25	-79.5022	0.0117647	0.0117647	Junction	FALSE	0.717681	-0.0765109
R1_DM	ROO_LTR	-	-	3125.05	-77.3522	0.0117647	0.0117647	Junction	FALSE	0.717681	-0.0765109
R1_DM	ROO_LTR	-	-	4633.19	0.49835	0.0235294	0.0235294	Junction	FALSE	0.717681	-0.0731878
R1_DM	ROO_LTR	-	-	3669.95	-4.55083	0.0117647	0.0235294	Junction	FALSE	0.363682	0.174172
R1_DM	ROO_LTR	-	-	5079.59	10.9229	0.0117647	0.0117647	Junction	FALSE	0.895854	-0.0299556
R1_DM	ROO_LTR	-	-	1469.73	23.5771	0.0117647	0.0117647	Junction	FALSE	0.420974	-0.158878
R1_DM	ROO_LTR	-	-	2300.15	28.1493	0.0117647	0.0117647	Junction	FALSE	0.900422	-0.0263744
R1_DM	ROO_LTR	-	-	1171.72	173.323	0.0117647	0.0117647	Junction	FALSE	0.932977	-0.019212
R1_DM	ROO_LTR	-	-	4064.85	142.1	0.0117647	0.0117647	Junction	FALSE	0.963891	0.0130187
R1_DM	ROO_LTR	+	-	2006.89	-34.144	0.0117647	0.0117647	Junction	FALSE	0.900422	-0.0263744
R1_DM	ROO_LTR	+	-	3298.74	27.2963	0.0352941	0.0352941	Junction	FALSE	0.777692	-0.0587914
R1_DM	ROO_LTR	+	-	4403.08	-40.6995	0.0470588	0.0588235	Junction	FALSE	0.455647	-0.149607
R1_DM	ROO_LTR	+	-	3068.6	21.1493	0.0117647	0.0117647	Junction	FALSE	0.900422	-0.0263744
R1_DM	ROO_LTR	+	-	5415.84	-109.266	0.0352941	0.0352941	Junction	FALSE	0.556373	0.12327
R1_DM	ROO_LTR	+	-	2584.54	-4.33912	0.0117647	0.0117647	Junction	FALSE	0.341429	-0.180365
R1_DM	ROO_LTR	+	-	5175.65	-37.8079	0.0470588	0.0705882	Junction	FALSE	0.483406	-0.142868
R1_DM	ROO_LTR	+	-	1202.69	70.8134	0.0117647	0.0117647	Junction	FALSE	0.483406	0.141941
R1_DM	ROO_LTR	+	-	3553.89	133.773	0.0117647	0.0117647	Junction	FALSE	0.900422	-0.0263744
R1_DM	ROO_LTR	+	-	3505.01	16.8444	0.0117647	0.0117647	Junction	FALSE	0.474952	-0.144553
R1_DM	ROO_LTR	+	+	1760.3	476.299	0.0117647	0.0117647	Junction	FALSE	0.690368	-0.0836733
R1_DM	ROO_LTR	+	+	1626.72	425.303	0.0470588	0.0470588	Junction	FALSE	0.426165	0.15598
R1_DM	ROO_LTR	+	+	2011.03	440.717	0.0235294	0.0235294	Junction	FALSE	0.319195	-0.19292
R1_DM	ROO_LTR	+	+	678.298	445.098	0.0117647	0.0117647	Junction	FALSE	0.963891	0.0130187
R1_DM	ROO_LTR	+	+	4612	447.856	0.0235294	0.0235294	Junction	FALSE	0.717681	-0.0731878
R1_DM	ROO_LTR	+	+	5485.93	568.428	0.0117647	0.0117647	Junction	FALSE	0.992824	-0.00130608
R1_DM	ROO_LTR	+	+	3424.28	391.109	0.0235294	0.0235294	Junction	FALSE	0.576326	-0.116495
R1_DM	ROO_LTR	+	+	3930.5	360.502	0.0117647	0.0117647	Junction	FALSE	0.717681	-0.0765109
R1_DM	ROO_LTR	+	+	1404.08	360.531	0.0235294	0.0235294	Junction	FALSE	0.768691	-0.0604504
R1_DM	ROO_LTR	+	+	5434.49	531.356	0.0235294	0.0235294	Junction	FALSE	0.967213	-0.0120481
R1_DM	ROO_LTR	+	+	1622.3	288.5	0.0117647	0.0117647	Junction	FALSE	0.420974	-0.158878
R1_DM	ROO_LTR	+	+	2330.02	423.517	0.0117647	0.0117647	Junction	FALSE	0.900422	-0.0263744
R1_DM	ROO_LTR	+	+	4317.07	315.4	0.0117647	0.0117647	Junction	FALSE	0.963891	0.0130187
R1_DM	ROO_LTR	+	+	1414.5	518.5	0.0117647	0.0117647	Junction	FALSE	0.420974	-0.158878
R1_DM	ROO_LTR	+	+	3649.45	432.455	0.0117647	0.0235294	Junction	FALSE	0.363682	0.174172
R1_DM	ROO_LTR	+	+	5016.24	459.494	0.0117647	0.0117647	Junction	FALSE	0.895854	-0.0299556
R1_DM	DIVER_LTR	-	+	1505.11	308.497	0.870588	1.4	Junction	FALSE	0.181466	-0.241884
R1_DM	DIVER_LTR	-	+	631.892	311.299	0.317647	0.317647	Junction	FALSE	0.727991	-0.0695438
R1_DM	DIVER_LTR	-	-	4982.18	-87.7154	0.0705882	0.0705882	Junction	FALSE	0.11883	-0.264108
R1_DM	DIVER_LTR	+	-	5134.46	-93.9847	0.447059	0.447059	Junction	FALSE	0.576326	-0.119495
R1_DM	DIVER_LTR	+	-	1336.29	-118.422	0.8	0.823529	Junction	FALSE	0.571304	-0.121075
R1_DM	DIVER_LTR	+	+	4756.82	323.938	0.0588235	0.0588235	Junction	FALSE	0.132195	-0.259005
R1_DM	3L	-	+	3628.27	3.30872e+06	0.0117647	0.0117647	Junction	FALSE	0.5868	-0.112323
R1_DM	3L	-	+	-4.98538	2.31126e+07	0.564706	0.576471	Junction	FALSE	0.526457	0.131453
R1_DM	3L	-	+	5047.3	2.38488e+07	0.0235294	0.0235294	Junction	FALSE	0.638025	0.0974939
R1_DM	3L	-	+	4564.62	2.38489e+07	0.388235	0.388235	Junction	FALSE	0.875315	0.035627
R1_DM	3L	-	+	2667.31	1.91536e+07	0.0588235	0.0588235	Junction	FALSE	0.610675	0.10532
R1_DM	3L	-	+	4877.76	1.69198e+07	0.0705882	0.0705882	Junction	FALSE	0.639045	-0.0952606
R1_DM	3L	-	+	762.53	1.91536e+07	0.0117647	0.0117647	Junction	FALSE	0.895854	0.0309246
R1_DM	3L	-	-	-33.8909	9.3996e+06	0.0823529	0.0823529	Junction	FALSE	0.371497	-0.17074
R1_DM	3L	-	-	4778.31	4.74715e+06	0.0117647	0.0117647	Junction	FALSE	0.526457	-0.130229
R1_DM	3L	-	-	2118.9	1.69717e+07	0.0117647	0.0117647	Junction	FALSE	0.526457	-0.130229
R1_DM	3L	+	-	5378.84	2.34002e+07	0.941176	0.952941	Junction	FALSE	0.243119	0.216281
R1_DM	3L	+	-	5376.47	2.3118e+07	0.529412	0.552941	Junction	FALSE	0.741591	-0.0672251
R1_DM	3L	+	-	5369.87	2.38497e+07	0.482353	0.494118	Junction	FALSE	0.992824	0.00271893
R1_DM	3L	+	-	5385.45	1.91536e+07	0.0588235	0.0588235	Junction	FALSE	0.371497	0.172606
R1_DM	3L	+	-	4188.35	2.41041e+07	0.0117647	0.0117647	Junction	FALSE	0.900422	-0.0263744
R1_DM	3L	+	-	3656.81	1.05958e+07	0.0117647	0.0117647	Junction	FALSE	0.703806	0.0810612
R1_DM	3L	+	-	5387.92	1.69198e+07	0.0588235	0.0588235	Junction	FALSE	0.540702	-0.126075
R1_DM	3L	+	-	5362.9	3.30881e+06	0.0117647	0.0117647	Junction	FALSE	0.5868	-0.112323
R1_DM	3L	+	+	5402.35	1.69716e+07	0.0117647	0.0117647	Junction	FALSE	0.526457	-0.130229
R1_DM	3L	+	+	5393.75	4.74708e+06	0.0117647	0.0117647	Junction	FALSE	0.526457	-0.130229
R1_DM	3L	+	+	5128.42	2.30544e+07	0.0705882	0.0705882	Junction	FALSE	0.526457	0.132382
R1_DM	3L	+	+	5332.72	2.27028e+07	0.0117647	0.0117647	Junction	FALSE	0.108345	-0.269895
R1_DM	BATUMI_I	-	+	4663.28	6671.72	0.0117647	0.0117647	Junction	FALSE	0.992824	0.00227511
R1_DM	BATUMI_I	-	-	4373.94	7293.94	0.0117647	0.0117647	Junction	FALSE	0.992824	0.00227511
R1_DM	BATUMI_I	+	-	1737.15	6980.34	0.164706	0.164706	Junction	FALSE	0.317681	-0.193746
R1_DM	HMSBEAGLE_LTR	-	-	4182.45	-102.381	0.0117647	0.0117647	Junction	FALSE	0.532836	0.127617
R1_DM	HMSBEAGLE_LTR	-	-	2407.58	-58.8816	0.0352941	0.0352941	Junction	FALSE	0.476076	0.144197
R1_DM	HMSBEAGLE_LTR	+	+	2234.9	368.681	0.0352941	0.0352941	Junction	FALSE	0.307181	0.198606
R1_DM	HMSBEAGLE_LTR	+	+	1700.18	393.005	0.0705882	0.0705882	Junction	FALSE	0.852589	0.0419281
R1_DM	HMSBEAGLE_LTR	+	+	3602.21	413.881	0.0117647	0.0117647	Junction	FALSE	0.532836	0.127617
R1_DM	ZAM_I	+	-	1390.34	8.16452	0.0352941	0.0352941	Junction	FALSE	0.426165	-0.157146
R1_DM	(A)n	-	+	5112.08	250.919	0.0117647	0.0117647	Junction	FALSE	0.639045	-0.0944169
R1_DM	(A)n	-	+	139.086	280.247	0.0235294	0.0235294	Junction	FALSE	0.768691	-0.0604504
R1_DM	ACCORD2_I	-	+	2366.38	7360.3	1	1.34118	Junction	FALSE	0.0146213	0.356015
R1_DM	ACCORD2_I	-	+	2430.21	1927.32	0.0235294	0.0235294	Junction	FALSE	0.537373	-0.126685
R1_DM	ACCORD2_I	+	-	2534.99	-105.298	1	4.51765	Junction	FALSE	0.108345	0.270636
R1_DM	ACCORD2_I	+	-	3837.73	1522.03	0.164706	0.164706	Junction	FALSE	0.14398	0.253907
R1_DM	ACCORD2_I	+	-	3504.41	1137.22	0.105882	0.105882	Junction	FALSE	0.87257	0.0360402
R1_DM	ACCORD2_I	+	-	1953.51	-88.7428	0.176471	0.176471	Junction	FALSE	0.307181	-0.199007
R1_DM	ACCORD2_I	+	-	3900.05	6949.95	0.0352941	0.0352941	Junction	FALSE	0.965721	0.012359
R1_DM	QUASIMODO2_LTR_DM	+	-	5404.17	92.1681	0.0705882	0.0705882	Junction	FALSE	0.967213	0.0117768
R1_DM	BLOOD_LTR	-	+	2433.03	340.541	0.0235294	0.0235294	Junction	FALSE	0.996728	0.00068932
R1_DM	BLOOD_LTR	-	+	1789.29	400.712	0.0117647	0.0117647	Junction	FALSE	0.727991	-0.0693486
R1_DM	BLOOD_LTR	-	+	2021.81	372.441	0.0235294	0.0235294	Junction	FALSE	0.332681	0.189203
R1_DM	BLOOD_LTR	-	+	2805.84	282.829	0.0117647	0.0117647	Junction	FALSE	0.814448	0.0488305
R1_DM	BLOOD_LTR	-	+	153.298	385.242	0.0823529	0.0823529	Junction	FALSE	0.0595747	0.302629
R1_DM	BLOOD_LTR	-	+	4298.71	444.958	0.0117647	0.0117647	Junction	FALSE	0.610675	-0.10516
R1_DM	BLOOD_LTR	-	+	-32.3854	410.51	0.0235294	0.0235294	Junction	FALSE	0.727237	-0.0706404
R1_DM	BLOOD_LTR	-	+	1979.33	283.068	0.0117647	0.0117647	Junction	FALSE	0.98536	0.00585629
R1_DM	BLOOD_LTR	-	+	4639.51	287.825	0.0352941	0.0352941	Junction	FALSE	0.768626	-0.0608841
R1_DM	BLOOD_LTR	-	+	3404.14	435.006	0.0117647	0.0117647	Junction	FALSE	0.635294	-0.0979981
R1_DM	BLOOD_LTR	-	+	4040.19	423.612	0.0235294	0.0235294	Junction	FALSE	0.448527	0.150991
R1_DM	BLOOD_LTR	-	+	4859.91	423.693	0.0352941	0.0470588	Junction	FALSE	0.420974	-0.158688
R1_DM	BLOOD_LTR	-	+	1017.69	452.767	0.0235294	0.0235294	Junction	FALSE	0.341429	-0.18273
R1_DM	BLOOD_LTR	-	+	1737.96	400.038	0.0117647	0.0117647	Junction	FALSE	0.576326	-0.115904
R1_DM	BLOOD_LTR	-	+	1173.31	391.375	0.0117647	0.0117647	Junction	FALSE	0.98536	0.00585629
R1_DM	BLOOD_LTR	-	-	40.0954	-18.3856	0.0470588	0.0588235	Junction	FALSE	0.455647	-0.149607
R1_DM	BLOOD_LTR	-	-	874.748	8.74784	0.0117647	0.0117647	Junction	FALSE	0.717681	-0.0765109
R1_DM	BLOOD_LTR	-	-	4565.48	-18.6708	0.0117647	0.0117647	Junction	FALSE	0.635294	-0.0979981
R1_DM	BLOOD_LTR	-	-	3781.56	67.5043	0.0470588	0.0470588	Junction	FALSE	0.341429	-0.179535
R1_DM	BLOOD_LTR	-	-	4427.18	-100.789	0.0352941	0.0352941	Junction	FALSE	0.5868	-0.113201
R1_DM	BLOOD_LTR	-	-	281.465	33.4647	0.0235294	0.0235294	Junction	FALSE	0.775406	0.0592816
R1_DM	BLOOD_LTR	-	-	4247.47	-30.2361	0.0235294	0.0352941	Junction	FALSE	0.88653	-0.0339454
R1_DM	BLOOD_LTR	-	-	1679.54	-5.46267	0.0235294	0.0235294	Junction	FALSE	0.576326	-0.116495
R1_DM	BLOOD_LTR	-	-	4086.4	-80.9827	0.0117647	0.0117647	Junction	FALSE	0.371497	0.170591
R1_DM	BLOOD_LTR	-	-	2643.79	-36.6284	0.0352941	0.0352941	Junction	FALSE	0.679418	-0.085996
R1_DM	BLOOD_LTR	+	-	1001.61	50.0948	0.0235294	0.0352941	Junction	FALSE	0.593486	-0.109579
R1_DM	BLOOD_LTR	+	-	5068.71	-47.3748	0.0117647	0.0235294	Junction	FALSE	0.610675	-0.10516
R1_DM	BLOOD_LTR	+	-	1675.68	-57.424	0.0352941	0.0352941	Junction	FALSE	0.610675	-0.106923
R1_DM	BLOOD_LTR	+	-	307.501	134.13	0.0705882	0.0705882	Junction	FALSE	0.101597	0.277109
R1_DM	BLOOD_LTR	+	-	2115.21	68.6892	0.0235294	0.0235294	Junction	FALSE	0.332681	0.189203
R1_DM	BLOOD_LTR	+	-	2230.17	125.082	0.0117647	0.0117647	Junction	FALSE	0.98536	0.00585629
R1_DM	BLOOD_LTR	+	-	2133.39	-22.5368	0.0117647	0.0117647	Junction	FALSE	0.895854	-0.0299556
R1_DM	BLOOD_LTR	+	-	4714.87	-2.34241	0.0235294	0.0235294	Junction	FALSE	0.717681	-0.0757353
R1_DM	BLOOD_LTR	+	-	5434.09	-90.3855	0.0823529	0.0823529	Junction	FALSE	0.0595747	0.302629
R1_DM	BLOOD_LTR	+	-	4016.17	4.0508	0.0235294	0.0352941	Junction	FALSE	0.576326	0.117323
R1_DM	BLOOD_LTR	+	-	4277.05	36.9466	0.0117647	0.0117647	Junction	FALSE	0.610675	-0.10516
R1_DM	BLOOD_LTR	+	-	2950.96	7.68751	0.0117647	0.0235294	Junction	FALSE	0.814448	0.0488305
R1_DM	BLOOD_LTR	+	-	2508.76	3.1278	0.0117647	0.0117647	Junction	FALSE	0.895854	0.0309246
R1_DM	BLOOD_LTR	+	-	364.978	-113.978	0.0117647	0.0117647	Junction	FALSE	0.727991	-0.0693486
R1_DM	BLOOD_LTR	+	-	4838.22	4.77694	0.0470588	0.0470588	Junction	FALSE	0.78243	-0.0573636
R1_DM	BLOOD_LTR	+	-	3588.15	-90.3631	0.0117647	0.0117647	Junction	FALSE	0.635294	-0.0979981
R1_DM	BLOOD_LTR	+	-	1978.47	-110.268	0.0117647	0.0117647	Junction	FALSE	0.98536	0.00585629
R1_DM	BLOOD_LTR	+	-	1176.74	0.97891	0.0117647	0.0117647	Junction	FALSE	0.98536	0.00585629
R1_DM	BLOOD_LTR	+	-	3362.22	-7.506	0.0117647	0.0117647	Junction	FALSE	0.635294	-0.0979981
R1_DM	BLOOD_LTR	+	+	3315.76	330.147	0.729412	0.741176	Junction	FALSE	0.0413133	0.316207
R1_DM	BLOOD_LTR	+	+	5510.68	564.177	0.0117647	0.0117647	Junction	FALSE	0.593037	0.109711
R1_DM	BLOOD_LTR	+	+	4527.99	375.69	0.0941176	0.0941176	Junction	FALSE	0.713077	-0.0792375
R1_DM	BLOOD_LTR	+	+	1694.56	383.259	0.0235294	0.0235294	Junction	FALSE	0.576326	-0.116495
R1_DM	BLOOD_LTR	+	+	336.327	384.66	0.0235294	0.0235294	Junction	FALSE	0.775406	0.0592816
R1_DM	BLOOD_LTR	+	+	3991.66	378.261	0.0235294	0.0235294	Junction	FALSE	0.717681	0.077114
R1_DM	BLOOD_LTR	+	+	2372.08	566.577	0.0117647	0.0117647	Junction	FALSE	0.932977	-0.019212
R1_DM	BLOOD_LTR	+	+	2300.56	470.223	0.0117647	0.0117647	Junction	FALSE	0.992824	0.00227511
R1_DM	BLOOD_LTR	+	+	3893.76	352.238	0.0470588	0.0470588	Junction	FALSE	0.341429	-0.179535
R1_DM	BLOOD_LTR	+	+	1156.68	513.675	0.0117647	0.0117647	Junction	FALSE	0.371497	0.170591
R1_DM	BLOOD_LTR	+	+	5104.17	522.095	0.0235294	0.0235294	Junction	FALSE	0.576326	-0.116495
R1_DM	BLOOD_LTR	+	+	967.752	281.752	0.0117647	0.0117647	Junction	FALSE	0.717681	-0.0765109
R1_DM	BLOOD_LTR	+	+	4283.58	351.934	0.0235294	0.0235294	Junction	FALSE	0.980392	-0.00950063
R1_DM	BLOOD_LTR	+	+	2606.55	368.248	0.0235294	0.0235294	Junction	FALSE	0.779859	-0.0579029
R1_DM	BLOOD_LTR	+	+	4241.08	483.327	0.0117647	0.0117647	Junction	FALSE	0.895854	-0.0299556
R1_DM	R2_DM	-	+	5045.45	3581.11	0.0705882	0.0705882	Junction	FALSE	0.437088	-0.154056
R1_DM	R2_DM	-	+	2637.93	1937.44	0.564706	0.564706	Junction	FALSE	0.867851	0.03699
R1_DM	R2_DM	-	+	-24.0098	3626.32	1	14.2824	Junction	FALSE	0.576326	-0.117723
R1_DM	R2_DM	-	+	1729.79	3581.24	0.964706	1.16471	Junction	FALSE	0.57162	0.120936
R1_DM	R2_DM	-	+	4762.75	3632.1	0.905882	2.62353	Junction	FALSE	0.671073	-0.088599
R1_DM	R2_DM	-	+	3071.77	3545.53	0.0470588	0.0588235	Junction	FALSE	0.185171	-0.238967
R1_DM	R2_DM	-	+	3353.2	3630.6	0.0117647	0.0235294	Junction	FALSE	0.690368	-0.0836733
R1_DM	R2_DM	-	+	547.818	3768.84	0.0705882	0.0705882	Junction	FALSE	0.483406	-0.141995
R1_DM	R2_DM	-	+	4125	3670.78	0.0117647	0.0117647	Junction	FALSE	0.963891	0.0130187
R1_DM	R2_DM	-	+	1147.18	3701.7	0.823529	0.847059	Junction	FALSE	0.606232	-0.107742
R1_DM	R2_DM	-	+	2798.72	3610.46	0.0117647	0.0235294	Junction	FALSE	0.717681	-0.0765109
R1_DM	R2_DM	-	+	4397.55	3642.99	0.105882	0.188235	Junction	FALSE	0.528566	-0.129719
R1_DM	R2_DM	-	+	2905.03	3603.35	0.0117647	0.0117647	Junction	FALSE	0.992824	0.00227511
R1_DM	R2_DM	-	+	5098.78	3526.73	0.305882	0.305882	Junction	FALSE	0.25516	0.213291
R1_DM	R2_DM	-	+	3871.21	3618.79	0.0117647	0.0117647	Junction	FALSE	0.838695	-0.0442803
R1_DM	R2_DM	-	+	3628.4	3663.96	0.0117647	0.0235294	Junction	FALSE	0.864879	0.0380869
R1_DM	R2_DM	-	+	322.976	3703.4	0.282353	0.282353	Junction	FALSE	0.717681	0.0748422
R1_DM	R2_DM	-	+	1474.92	1733.58	0.0117647	0.0117647	Junction	FALSE	0.895854	-0.0299556
R1_DM	R2_DM	-	+	2674.03	3655.41	0.0352941	0.0352941	Junction	FALSE	0.795828	-0.0546061
R1_DM	R2_DM	-	+	2557.16	2259.14	0.0823529	0.0823529	Junction	FALSE	0.14398	0.253466
R1_DM	R2_DM	-	+	1.63839	3454.87	0.0352941	0.0470588	Junction	FALSE	0.420974	0.15881
R1_DM	R2_DM	-	+	1311.54	3712.62	0.0235294	0.0235294	Junction	FALSE	0.61711	-0.103758
R1_DM	R2_DM	-	+	2906.42	2244.3	0.176471	0.176471	Junction	FALSE	0.179216	0.242622
R1_DM	R2_DM	-	+	4832.71	3623.74	0.341176	0.552941	Junction	FALSE	0.900422	0.0290106
R1_DM	R2_DM	-	+	-81.7723	3665.17	0.152941	0.152941	Junction	FALSE	0.67028	-0.0887667
R1_DM	R2_DM	-	+	1419.32	3636.49	0.0117647	0.0117647	Junction	FALSE	0.108345	-0.269895
R1_DM	R2_DM	-	+	1882.6	3653.76	0.0823529	0.164706	Junction	FALSE	0.793051	-0.0558639
R1_DM	R2_DM	-	+	5014.4	3647.76	0.105882	0.129412	Junction	FALSE	0.341429	-0.179723
R1_DM	R2_DM	-	+	793.389	3636.29	0.0823529	0.0823529	Junction	FALSE	0.848668	-0.0429164
R1_DM	R2_DM	-	+	2770.11	3656.91	0.0235294	0.0235294	Junction	FALSE	0.870627	0.0363542
R1_DM	R2_DM	-	+	3976.13	3648.7	0.0117647	0.0117647	Junction	FALSE	0.441207	0.152685
R1_DM	R2_DM	-	+	3460.89	3622.91	0.0117647	0.0117647	Junction	FALSE	0.639045	-0.0944169
R1_DM	R2_DM	-	+	4980.08	3551.3	0.0705882	0.0823529	Junction	FALSE	0.803169	-0.0534229
R1_DM	R2_DM	-	+	2254.95	3607.08	0.0235294	0.0235294	Junction	FALSE	0.426165	-0.157255
R1_DM	R2_DM	-	+	4588.86	3605.38	0.0235294	0.0235294	Junction	FALSE	0.522931	-0.134328
R1_DM	R2_DM	-	+	1522.83	3653.41	0.0235294	0.0352941	Junction	FALSE	0.826905	0.0465164
R1_DM	R2_DM	-	+	4938.04	3641.08	0.117647	0.152941	Junction	FALSE	0.402032	-0.164718
R1_DM	R2_DM	-	+	1582.52	3647.01	0.0235294	0.0235294	Junction	FALSE	0.233932	0.219773
R1_DM	R2_DM	-	+	3519.55	3627.34	0.0117647	0.0117647	Junction	FALSE	0.814448	0.0488305
R1_DM	R2_DM	-	+	4503.16	3625.5	0.0470588	0.0705882	Junction	FALSE	0.51102	-0.13622
R1_DM	R2_DM	-	+	89.0739	3675.94	0.164706	0.294118	Junction	FALSE	0.341429	0.179529
R1_DM	R2_DM	-	+	4939.39	3615.15	0.0705882	0.0941176	Junction	FALSE	0.74329	-0.0664324
R1_DM	R2_DM	-	+	869.212	3637.29	0.0235294	0.0235294	Junction	FALSE	0.98536	0.0057843
R1_DM	R2_DM	-	+	4255.95	3595.84	0.0117647	0.0470588	Junction	FALSE	0.526457	0.131198
R1_DM	R2_DM	-	+	2564.67	3663.49	0.0352941	0.105882	Junction	FALSE	0.237626	-0.218596
R1_DM	R2_DM	-	+	2039.85	3621.01	0.0117647	0.0117647	Junction	FALSE	0.864879	0.0380869
R1_DM	R2_DM	-	+	670.186	3578.79	0.0352941	0.0588235	Junction	FALSE	0.612578	-0.104758
R1_DM	R2_DM	-	+	3541.46	381.537	0.0117647	0.0117647	Junction	FALSE	0.483406	0.141941
R1_DM	R2_DM	-	+	3718.34	3642.66	0.0117647	0.0117647	Junction	FALSE	0.814448	0.0488305
R1_DM	R2_DM	+	-	5430.39	297.937	0.952941	1.12941	Junction	FALSE	0.323737	0.191901
R1_DM	R2_DM	+	-	247.252	165.748	0.0117647	0.0117647	Junction	FALSE	0.717681	-0.0765109
R1_DM	R2_DM	+	-	505.049	1879.94	0.0705882	0.0705882	Junction	FALSE	0.814448	-0.0515411
R1_DM	R2_DM	+	-	5455.21	-73.8903	0.105882	0.105882	Junction	FALSE	0.802215	0.05361
R1_DM	R2_DM	+	-	3119.69	2823.45	0.164706	0.164706	Junction	FALSE	0.791633	0.0561067
R1_DM	R2_DM	+	-	5262.9	1896.76	0.647059	0.988235	Junction	FALSE	0.663561	0.089808
R1_DM	R2_DM	+	-	4466.54	-83.2026	0.0117647	0.0117647	Junction	FALSE	0.864879	0.0380869
R1_DM	R2_DM	+	-	5369.6	1688.87	0.364706	0.411765	Junction	FALSE	0.306587	-0.200924
R1_DM	R2_DM	+	-	909.037	3296.44	0.0470588	0.0470588	Junction	FALSE	0.426165	0.15598
R1_DM	R2_DM	+	-	577.677	761.323	0.0117647	0.0117647	Junction	FALSE	0.5868	0.113292
R1_DM	R2_DM	+	-	2929.21	-17.7534	0.376471	0.4	Junction	FALSE	0.474952	-0.145872
R1_DM	R2_DM	+	-	5400.1	757.786	0.0235294	0.0235294	Junction	FALSE	0.69163	-0.0833778
R1_DM	R2_DM	+	-	454.117	1264.36	0.0117647	0.0352941	Junction	FALSE	0.717681	-0.0729298
R1_DM	R2_DM	+	-	5414.47	2223.87	0.0470588	0.0470588	Junction	FALSE	0.496479	-0.139419
R1_DM	R2_DM	+	-	5349.2	1536.4	0.0117647	0.0117647	Junction	FALSE	0.5868	-0.112323
R1_DM	R2_DM	+	-	5355.91	-47.4055	0.0235294	0.0352941	Junction	FALSE	0.62306	-0.101533
R1_DM	R2_DM	+	-	317.532	2350.59	0.0235294	0.0235294	Junction	FALSE	0.779859	-0.0579029
R1_DM	R2_DM	+	-	461.355	-31.0182	0.282353	0.305882	Junction	FALSE	0.181763	-0.241472
R1_DM	R2_DM	+	-	385.515	1288.48	0.0117647	0.0117647	Junction	FALSE	0.635294	-0.0979981
R1_DM	R2_DM	+	-	5409.11	2327.99	0.0705882	0.0705882	Junction	FALSE	0.341429	-0.185715
R1_DM	R2_DM	+	-	4701.83	62.1729	0.0117647	0.0117647	Junction	FALSE	0.895854	-0.0299556
R1_DM	R2_DM	+	-	5381.96	490.982	0.0235294	0.0235294	Junction	FALSE	0.768691	-0.0604504
R1_DM	R2_DM	+	-	2007.29	1957.79	0.0117647	0.0117647	Junction	FALSE	0.717681	0.0738988
R1_DM	R2_DM	+	-	3413.04	388.025	0.0117647	0.0117647	Junction	FALSE	0.814448	0.0488305
R1_DM	R2_DM	+	-	3393.85	21.3674	0.0117647	0.0117647	Junction	FALSE	0.895854	-0.0299556
R1_DM	R2_DM	+	-	2432.07	71.8164	0.0117647	0.0117647	Junction	FALSE	0.341429	-0.180365
R1_DM	R2_DM	+	-	1214.52	-10.8507	0.0117647	0.0117647	Junction	FALSE	0.900422	-0.0263744
R1_DM	R2_DM	+	-	5224.65	1667.85	0.0117647	0.0117647	Junction	FALSE	0.5868	-0.112323
R1_DM	R2_DM	+	-	5124.19	142.712	0.0117647	0.0117647	Junction	FALSE	0.98536	0.00585629
R1_DM	R2_DM	+	-	1198.87	59.5507	0.0117647	0.0117647	Junction	FALSE	0.108345	-0.269895
R1_DM	R2_DM	+	-	5413.67	2855.33	0.0117647	0.0117647	Junction	FALSE	0.576326	-0.115904
R1_DM	R2_DM	+	-	5035.5	-36.0854	0.0117647	0.0235294	Junction	FALSE	0.61711	0.102548
R1_DM	R2_DM	+	-	651.319	1566.01	0.0117647	0.0117647	Junction	FALSE	0.5868	0.113292
R1_DM	COPIA_LTR_DM	-	+	4938.94	345.951	0.0352941	0.0352941	Junction	FALSE	0.332681	-0.188536
R1_DM	COPIA_LTR_DM	-	+	187.629	337.371	0.0117647	0.0117647	Junction	FALSE	0.576326	-0.115904
R1_DM	COPIA_LTR_DM	-	-	-116.888	-135.533	0.0352941	0.0352941	Junction	FALSE	0.532836	-0.127849
R1_DM	COPIA_LTR_DM	-	-	4660.57	-131.958	0.0470588	0.0470588	Junction	FALSE	0.341429	-0.179535
R1_DM	COPIA_LTR_DM	-	-	494.403	-87.5974	0.0117647	0.0117647	Junction	FALSE	0.717681	0.0738988
R1_DM	COPIA_LTR_DM	+	-	5411.77	-35.2112	0.0235294	0.0235294	Junction	FALSE	0.552169	-0.124138
R1_DM	DOC6_DM	-	+	1511.69	4309.44	0.0470588	0.0588235	Junction	FALSE	0.325692	0.191335
R1_DM	DOC6_DM	-	-	-99.8311	3506.17	0.0235294	0.0235294	Junction	FALSE	0.18896	0.237606
R1_DM	DOC6_DM	+	-	1273.26	3913.57	0.0470588	0.0470588	Junction	FALSE	0.307181	0.196096
R1_DM	DNAREP1_DM	-	+	108.368	292.694	0.882353	0.882353	Junction	FALSE	0.496479	-0.139448
R1_DM	DNAREP1_DM	-	+	4427.85	682.459	0.976471	1.01176	Junction	FALSE	0.418121	0.161114
R1_DM	DNAREP1_DM	-	+	2213.42	534.023	0.341176	0.341176	Junction	FALSE	0.776227	-0.0591111
R1_DM	DNAREP1_DM	-	+	310.571	274.135	0.0588235	0.0588235	Junction	FALSE	0.205954	0.231685
R1_DM	DNAREP1_DM	-	+	996.724	335.226	0.117647	0.117647	Junction	FALSE	0.61711	-0.103846
R1_DM	DNAREP1_DM	-	+	1921.5	335.136	0.0352941	0.0470588	Junction	FALSE	0.992824	-0.00363103
R1_DM	DNAREP1_DM	-	+	2503.99	720.01	0.0117647	0.0117647	Junction	FALSE	0.741591	0.0667364
R1_DM	DNAREP1_DM	+	-	4864.13	119.864	0.388235	0.388235	Junction	FALSE	0.901267	0.026119
R1_DM	DNAREP1_DM	+	-	5200.98	10.2856	0.0352941	0.0352941	Junction	FALSE	0.965721	0.012359
R1_DM	DMRT1B	-	+	2991.24	5196.08	0.388235	0.4	Junction	FALSE	0.420974	0.159918
R1_DM	DMRT1B	-	+	887.15	5105.01	0.141176	0.141176	Junction	FALSE	0.332681	-0.18894
R1_DM	DMRT1B	-	+	469.22	5124.76	0.0470588	0.0470588	Junction	FALSE	0.307181	0.196096
R1_DM	DMRT1B	-	+	1203.63	5312.45	0.129412	0.129412	Junction	FALSE	0.441207	-0.153019
R1_DM	DMRT1B	-	+	2469.02	5170.58	0.0235294	0.0235294	Junction	FALSE	0.727237	-0.0706404
R1_DM	DMRT1B	-	-	4491.95	-105.222	0.905882	0.952941	Junction	FALSE	0.627284	0.100953
R1_DM	DMRT1B	-	-	4570.13	573.951	0.458824	0.682353	Junction	FALSE	0.474952	-0.145389
R1_DM	DMRT1B	-	-	2718.78	3145.53	0.117647	0.117647	Junction	FALSE	0.396541	0.165815
R1_DM	DMRT1B	-	-	176.49	4260.44	0.529412	0.588235	Junction	FALSE	0.576326	-0.117948
R1_DM	DMRT1B	-	-	-4.99125	482.585	0.823529	1.31765	Junction	FALSE	0.98536	-0.00589394
R1_DM	DMRT1B	-	-	4530.28	2148.61	0.0588235	0.0705882	Junction	FALSE	0.470818	0.147201
R1_DM	DMRT1B	-	-	380.321	1247.44	0.0470588	0.0470588	Junction	FALSE	0.307181	0.196096
R1_DM	DMRT1B	-	-	4613.29	462.432	0.0705882	0.0941176	Junction	FALSE	0.56353	0.122165
R1_DM	DMRT1B	-	-	4548.02	417.378	0.0117647	0.0117647	Junction	FALSE	0.610675	-0.10516
R1_DM	DMRT1B	-	-	4513.03	1315.05	0.0235294	0.0235294	Junction	FALSE	0.206737	-0.231132
R1_DM	DMRT1B	+	-	3119.14	-73.3076	0.235294	0.235294	Junction	FALSE	0.526457	0.131729
R1_DM	DMRT1B	+	-	1082.61	-106.153	0.129412	0.129412	Junction	FALSE	0.392119	-0.166824
R1_DM	DMRT1B	+	-	616.799	-132.557	0.0470588	0.0470588	Junction	FALSE	0.307181	0.196096
R1_DM	DMRT1B	+	-	2603.13	-104.633	0.0235294	0.0235294	Junction	FALSE	0.727237	-0.0706404
R1_DM	DMRT1B	+	+	3000.1	5034	0.776471	0.776471	Junction	FALSE	0.562153	-0.122412
R1_DM	DMRT1B	+	+	4404.9	5266.19	0.705882	0.717647	Junction	FALSE	0.0645404	0.298605
R1_DM	DMRT1B	+	+	1458.01	3633.49	0.788235	0.976471	Junction	FALSE	0.0147547	0.355484
R1_DM	DMRT1B	+	+	2790.57	5290.11	0.188235	0.188235	Junction	FALSE	0.269541	0.209582
R1_DM	DMRT1B	+	+	2195.43	4751.21	0.188235	0.223529	Junction	FALSE	0.307181	-0.19844
R1_DM	DMRT1B	+	+	751.456	3839.08	0.552941	0.552941	Junction	FALSE	0.0647454	0.298124
R1_DM	DMRT1B	+	+	4945.64	3996.48	0.0823529	0.0823529	Junction	FALSE	0.0408896	-0.316824
R1_DM	DMRT1B	+	+	2566.55	5204.7	1	1.82353	Junction	FALSE	0.472034	0.146763
R1_DM	DMRT1B	+	+	3925.99	917.945	0.0470588	0.0470588	Junction	FALSE	0.703091	0.0812186
R1_DM	DMRT1B	+	+	365.803	5143.59	0.0470588	0.0470588	Junction	FALSE	0.307181	0.196096
R1_DM	DMRT1B	+	+	4343.83	5185.55	0.0588235	0.0588235	Junction	FALSE	0.807092	0.052805
R1_DM	DMRT1B	+	+	2402.2	5337.58	0.0705882	0.0705882	Junction	FALSE	0.736913	-0.0681244
R1_DM	DMRT1B	+	+	4128.63	5347.38	0.0235294	0.0235294	Junction	FALSE	0.258692	0.212131
R1_DM	DMRT1C	+	+	2718.14	2610.48	1	1.37647	Junction	FALSE	0.255149	0.213426
R1_DM	DMRT1C	+	+	2512.87	3252.49	1	2.61176	Junction	FALSE	0.907852	0.0251296
R1_DM	DMRT1C	+	+	2501.77	2223.64	0.0117647	0.0117647	Junction	FALSE	0.98536	0.00585629
R1_DM	DMRT1C	+	+	2573.94	2275.73	0.0235294	0.0235294	Junction	FALSE	0.576326	-0.116495
R1_DM	DMRT1A	-	-	2929.66	-34.4771	0.0352941	0.0352941	Junction	FALSE	0.532836	-0.127849
R1_DM	DMRT1A	-	-	4526.25	47.0185	0.0117647	0.0117647	Junction	FALSE	0.426165	0.156266
R1_DM	DMRT1A	+	+	2914.14	5140.36	0.0352941	0.0352941	Junction	FALSE	0.341429	-0.184351
R1_DM	DMRT1A	+	+	4571.85	5228.47	0.0117647	0.0117647	Junction	FALSE	0.426165	0.156266
R1_DM	DM412_LTR	-	+	302.688	405.312	0.0117647	0.0117647	Junction	FALSE	0.727991	-0.0693486
R1_DM	DM412_LTR	-	+	1299.54	645.458	0.0117647	0.0117647	Junction	FALSE	0.61711	0.102548
R1_DM	DM412_LTR	-	+	4302.79	329.21	0.0117647	0.0117647	Junction	FALSE	0.741591	0.0667364
R1_DM	DM412_LTR	-	+	4514.84	533.558	0.0352941	0.0705882	Junction	FALSE	0.364726	0.173919
R1_DM	DM412_LTR	-	+	-10.5579	506.305	0.0352941	0.0352941	Junction	FALSE	0.112545	0.267664
R1_DM	DM412_LTR	-	+	2875.33	540.924	0.0117647	0.0117647	Junction	FALSE	0.814448	0.0488305
R1_DM	DM412_LTR	-	+	5062.73	585.266	0.0117647	0.0117647	Junction	FALSE	0.992824	0.00227511
R1_DM	DM412_LTR	-	+	233.106	575.094	0.0117647	0.0117647	Junction	FALSE	0.900422	-0.0263744
R1_DM	DM412_LTR	-	+	1054.47	486.153	0.0117647	0.0117647	Junction	FALSE	0.5868	0.113292
R1_DM	DM412_LTR	-	-	710.674	77.8743	0.0235294	0.0235294	Junction	FALSE	0.233932	0.219773
R1_DM	DM412_LTR	-	-	3749.24	31.0375	0.0117647	0.0117647	Junction	FALSE	0.814448	0.0488305
R1_DM	DM412_LTR	-	-	4636.56	-31.4366	0.0117647	0.0117647	Junction	FALSE	0.483406	0.141941
R1_DM	DM412_LTR	-	-	1793.31	-36.294	0.0117647	0.0117647	Junction	FALSE	0.900422	-0.0263744
R1_DM	DM412_LTR	-	-	-155.237	-0.236888	0.0235294	0.0235294	Junction	FALSE	0.341429	0.181561
R1_DM	DM412_LTR	-	-	1354.98	68.0826	0.0117647	0.0117647	Junction	FALSE	0.639045	0.0953859
R1_DM	DM412_LTR	-	-	5093.82	156.323	0.0235294	0.0235294	Junction	FALSE	0.426165	0.156086
R1_DM	DM412_LTR	-	-	3693.74	-14.0348	0.0352941	0.0352941	Junction	FALSE	0.22584	0.223718
R1_DM	DM412_LTR	-	-	2728.43	87.6834	0.0117647	0.0117647	Junction	FALSE	0.895854	0.0309246
R1_DM	DM412_LTR	-	-	0.35697	-64.2412	0.0470588	0.0470588	Junction	FALSE	0.484974	0.141392
R1_DM	DM412_LTR	+	-	4534.61	73.1307	0.0352941	0.0352941	Junction	FALSE	0.307181	0.198606
R1_DM	DM412_LTR	+	-	1230.79	69.4944	0.0117647	0.0117647	Junction	FALSE	0.61711	0.102548
R1_DM	DM412_LTR	+	-	2717.67	-86.8735	0.0117647	0.0117647	Junction	FALSE	0.814448	0.0488305
R1_DM	DM412_LTR	+	-	1152.85	73.9473	0.0117647	0.0117647	Junction	FALSE	0.5868	0.113292
R1_DM	DM412_LTR	+	-	933.494	29.8807	0.0117647	0.0117647	Junction	FALSE	0.864879	0.0380869
R1_DM	DM412_LTR	+	-	5413.31	18.7739	0.0588235	0.0588235	Junction	FALSE	0.108345	0.272713
R1_DM	DM412_LTR	+	-	5102.23	-113.894	0.0117647	0.0117647	Junction	FALSE	0.900422	-0.0263744
R1_DM	DM412_LTR	+	-	5368.56	114.106	0.0117647	0.0117647	Junction	FALSE	0.900422	-0.0263744
R1_DM	DM412_LTR	+	-	397.645	27.6882	0.0117647	0.0117647	Junction	FALSE	0.727991	-0.0693486
R1_DM	DM412_LTR	+	-	2978.34	179.66	0.0117647	0.0117647	Junction	FALSE	0.814448	0.0488305
R1_DM	DM412_LTR	+	+	3673.56	483.447	0.0352941	0.0352941	Junction	FALSE	0.22584	0.223718
R1_DM	DM412_LTR	+	+	5114.52	552.722	0.0117647	0.0117647	Junction	FALSE	0.610675	-0.10516
R1_DM	DM412_LTR	+	+	5483.12	378.122	0.0117647	0.0117647	Junction	FALSE	0.610675	-0.10516
R1_DM	DM412_LTR	+	+	774.352	496.781	0.0235294	0.0235294	Junction	FALSE	0.233932	0.219773
R1_DM	DM412_LTR	+	+	3581.5	624.162	0.0117647	0.0117647	Junction	FALSE	0.814448	0.0488305
R1_DM	DM412_LTR	+	+	723.223	376.723	0.0117647	0.0117647	Junction	FALSE	0.992824	0.00227511
R1_DM	DM412_LTR	+	+	2831.89	457.174	0.0117647	0.0117647	Junction	FALSE	0.895854	0.0309246
R1_DM	DM412_LTR	+	+	1749.89	508.394	0.0117647	0.0117647	Junction	FALSE	0.900422	-0.0263744
R1_DM	DM412_LTR	+	+	3879.76	390.862	0.0117647	0.0117647	Junction	FALSE	0.814448	0.0488305
R1_DM	Gypsy2_I_DM	-	-	-117.064	4848.35	0.6	0.611765	Junction	FALSE	0.198394	0.235074
R1_DM	Gypsy2_I_DM	-	-	92.4123	4794.43	0.952941	0.952941	Junction	FALSE	0.816241	-0.0483965
R1_DM	Gypsy2_I_DM	-	-	-56.4587	5824.44	0.764706	0.764706	Junction	FALSE	0.719952	-0.0725579
R1_DM	Gypsy2_I_DM	-	-	-170.518	5793.11	0.0470588	0.0470588	Junction	FALSE	0.864879	-0.0391291
R1_DM	Gypsy2_I_DM	+	+	5317.79	4915.67	0.952941	1.10588	Junction	FALSE	0.779859	-0.058017
R1_DM	Gypsy2_I_DM	+	+	4151.97	4710.62	0.0235294	0.0235294	Junction	FALSE	0.923975	0.0210692
R1_DM	TABOR_I	+	+	2363.05	6322.89	0.0235294	0.0235294	Junction	FALSE	0.99151	-0.00440566
R1_DM	GYPSY6A_LTR	-	-	474.596	-19.737	0.988235	2.21176	Junction	FALSE	0.719952	0.0725133
R1_DM	GYPSY6A_LTR	-	-	-36.0256	77.5744	0.176471	0.176471	Junction	FALSE	0.986482	-0.00554122
R1_DM	GYPSY6A_LTR	-	-	673.972	48.829	0.0235294	0.0235294	Junction	FALSE	0.526457	0.130611
R1_DM	GYPSY6A_LTR	-	-	1526.98	66.4848	0.0117647	0.0117647	Junction	FALSE	0.635294	-0.0979981
R1_DM	GYPSY6A_LTR	-	-	640.176	-56.1572	0.0352941	0.0352941	Junction	FALSE	0.523865	-0.134127
R1_DM	GYPSY6A_LTR	+	+	2162.27	347.906	0.729412	0.729412	Junction	FALSE	0.75906	0.0629179
R1_DM	GYPSY6A_LTR	+	+	2098.63	345.298	0.0588235	0.0588235	Junction	FALSE	0.957412	0.0150595
R1_DM	GYPSY6A_LTR	+	+	2389.07	353.678	0.0352941	0.0352941	Junction	FALSE	0.717681	-0.0734401
R1_DM	Su(Ste)	-	+	5029.57	970.435	0.729412	1.17647	Junction	FALSE	0.102957	0.276006
R1_DM	Su(Ste)	-	+	4837.86	566.701	0.952941	3.55294	Junction	FALSE	0.0322867	0.326776
R1_DM	Su(Ste)	+	+	590.204	971.704	0.411765	0.411765	Junction	FALSE	0.294873	0.20418
R1_DM	Su(Ste)	+	+	637.719	682.019	0.117647	0.117647	Junction	FALSE	0.894749	0.0327823
R1_DM	IVK_DM	-	-	2541.78	14.5432	0.317647	0.376471	Junction	FALSE	0.0772157	0.290981
R1_DM	IVK_DM	+	+	2540.18	5410.42	0.317647	0.376471	Junction	FALSE	0.185171	0.238942
R1_DM	DM176_I	-	+	555.888	6466.45	0.0588235	0.0588235	Junction	FALSE	0.867035	-0.0374558
R1_DM	TABOR_LTR	-	+	4902.62	437.477	0.0117647	0.0117647	Junction	FALSE	0.932977	-0.019212
R1_DM	TABOR_LTR	-	+	1391.32	419.178	0.0117647	0.0117647	Junction	FALSE	0.992824	-0.00130608
R1_DM	TABOR_LTR	-	+	2392.49	524.014	0.0117647	0.0117647	Junction	FALSE	0.639045	-0.0944169
R1_DM	TABOR_LTR	-	-	4990.82	170.486	0.0117647	0.0117647	Junction	FALSE	0.639045	-0.0944169
R1_DM	TABOR_LTR	-	-	3281.19	12.8684	0.0352941	0.0352941	Junction	FALSE	0.22584	0.223718
R1_DM	TABOR_LTR	-	-	3476.61	-54.644	0.0117647	0.0117647	Junction	FALSE	0.900422	-0.0263744
R1_DM	TABOR_LTR	-	-	1691.63	43.1966	0.0117647	0.0117647	Junction	FALSE	0.576326	-0.115904
R1_DM	TABOR_LTR	-	-	1203.24	-40.2644	0.0117647	0.0117647	Junction	FALSE	0.639045	-0.0944169
R1_DM	TABOR_LTR	+	-	3721.18	-72.8766	0.0117647	0.0117647	Junction	FALSE	0.932977	-0.019212
R1_DM	TABOR_LTR	+	-	1285.43	157.072	0.0117647	0.0117647	Junction	FALSE	0.992824	-0.00130608
R1_DM	TABOR_LTR	+	-	2528.11	182.286	0.0117647	0.0117647	Junction	FALSE	0.639045	-0.0944169
R1_DM	TABOR_LTR	+	+	1679.74	545.639	0.0117647	0.0235294	Junction	FALSE	0.576326	-0.115904
R1_DM	TABOR_LTR	+	+	3398.56	533.727	0.0117647	0.0117647	Junction	FALSE	0.900422	-0.0263744
R1_DM	TABOR_LTR	+	+	3300.85	500.929	0.0352941	0.0352941	Junction	FALSE	0.22584	0.223718
R1_DM	TABOR_LTR	+	+	5214.14	455.889	0.0117647	0.0117647	Junction	FALSE	0.639045	-0.0944169
R1_DM	TABOR_LTR	+	+	4799.01	625.514	0.0117647	0.0117647	Junction	FALSE	0.639045	-0.0944169
R1_DM	MICROPIA_LTR	-	-	860.88	-114.722	0.682353	0.705882	Junction	FALSE	0.752622	-0.0649493
R1_DM	MICROPIA_LTR	-	-	593.293	59.6973	0.870588	1.02353	Junction	FALSE	0.532836	-0.128393
R1_DM	MICROPIA_LTR	+	+	2423.27	256.018	0.635294	0.635294	Junction	FALSE	0.0300462	0.329954
R1_DM	MICROPIA_LTR	+	+	1830.93	261.362	0.0588235	0.0588235	Junction	FALSE	0.676664	-0.0866889
R1_DM	DOC	-	+	2423.39	4720.08	0.870588	1.24706	Junction	FALSE	0.932603	-0.0196369
R1_DM	DOC	-	+	2287.21	4718.13	0.0941176	0.0941176	Junction	FALSE	0.209021	-0.229996
R1_DM	DOC	-	+	344.402	4720.11	0.105882	0.105882	Junction	FALSE	0.441207	0.152754
R1_DM	DOC	-	+	4393.07	4732.29	0.0588235	0.0588235	Junction	FALSE	0.527469	0.129937
R1_DM	DOC	-	+	2992.48	4674.52	0.0117647	0.0117647	Junction	FALSE	0.717681	0.0738988
R1_DM	DOC	-	+	-79.7045	4850.88	0.247059	0.247059	Junction	FALSE	0.306337	-0.201136
R1_DM	DOC	-	+	3725.31	4599.73	0.0705882	0.0705882	Junction	FALSE	0.849731	-0.0424957
R1_DM	DOC	-	+	4534.91	4824.46	0.0470588	0.0470588	Junction	FALSE	0.341429	-0.179535
R1_DM	DOC	-	+	4889.14	1640.96	0.0352941	0.0588235	Junction	FALSE	0.465887	-0.148194
R1_DM	DOC	-	+	922.999	4701.83	0.0117647	0.0117647	Junction	FALSE	0.75906	-0.0621862
R1_DM	DOC	-	+	1291.86	4739.04	0.0941176	0.0941176	Junction	FALSE	0.930794	0.0199455
R1_DM	DOC	-	+	4822.62	4646.05	0.0117647	0.0117647	Junction	FALSE	0.717681	-0.0729298
R1_DM	DOC	-	+	586.375	4646.62	0.0117647	0.0117647	Junction	FALSE	0.610675	-0.10516
R1_DM	DOC	-	+	794.042	4829.29	0.0117647	0.0117647	Junction	FALSE	0.610675	-0.10516
R1_DM	DOC	-	+	1340.41	4724.58	0.0823529	0.117647	Junction	FALSE	0.104831	0.27495
R1_DM	DOC	-	+	1023.38	4687.62	0.0117647	0.0117647	Junction	FALSE	0.639045	0.0953859
R1_DM	DOC	-	-	3950.58	0.209222	0.552941	0.588235	Junction	FALSE	0.653399	0.0916631
R1_DM	DOC	-	-	2602.44	-17.394	0.0117647	0.0117647	Junction	FALSE	0.895854	-0.0299556
R1_DM	DOC	-	-	4761.23	-10.5969	0.0588235	0.0588235	Junction	FALSE	0.576326	-0.116229
R1_DM	DOC	-	-	3572.55	2858.36	0.0470588	0.0588235	Junction	FALSE	0.441207	0.152842
R1_DM	DOC	-	-	4228.23	-148.133	0.0352941	0.0352941	Junction	FALSE	0.576326	0.119085
R1_DM	DOC	-	-	3125.79	39.8676	0.0117647	0.0117647	Junction	FALSE	0.635294	-0.0979981
R1_DM	DOC	-	-	3526.43	5.92975	0.0235294	0.0352941	Junction	FALSE	0.721427	0.0722641
R1_DM	DOC	-	-	2813.99	-14.578	0.0235294	0.0235294	Junction	FALSE	0.593037	0.110231
R1_DM	DOC	-	-	3715.54	26.857	0.105882	0.105882	Junction	FALSE	0.992824	-0.0041193
R1_DM	DOC	-	-	1190.05	28.136	0.0352941	0.0352941	Junction	FALSE	0.307181	0.198606
R1_DM	DOC	-	-	152.687	-18.6767	0.0117647	0.0117647	Junction	FALSE	0.593037	0.109711
R1_DM	DOC	-	-	4956.54	48.2539	0.0941176	0.0941176	Junction	FALSE	0.146213	0.252695
R1_DM	DOC	-	-	-135.983	-156.483	0.0235294	0.0235294	Junction	FALSE	0.501621	0.138254
R1_DM	DOC	-	-	4360.07	2502.21	0.0117647	0.0117647	Junction	FALSE	0.992824	-0.00130608
R1_DM	DOC	-	-	2050.09	31.5276	0.0117647	0.0117647	Junction	FALSE	0.717681	0.0738988
R1_DM	DOC	-	-	4521.77	-1.3947	0.0235294	0.0235294	Junction	FALSE	0.703905	-0.0808303
R1_DM	DOC	-	-	2304.96	7.8501	0.0235294	0.0235294	Junction	FALSE	0.826905	0.0465441
R1_DM	DOC	-	-	380.403	-2.0974	0.0117647	0.0117647	Junction	FALSE	0.717681	0.0738988
R1_DM	DOC	-	-	1450.53	-20.1797	0.0117647	0.0117647	Junction	FALSE	0.900422	-0.0263744
R1_DM	DOC	+	-	4922.4	2457.16	0.0117647	0.0117647	Junction	FALSE	0.717681	-0.0729298
R1_DM	DOC	+	-	2432.88	8.73399	0.835294	1	Junction	FALSE	0.812584	0.0519979
R1_DM	DOC	+	-	5343.63	1640.47	0.0352941	0.0705882	Junction	FALSE	0.472034	-0.146683
R1_DM	DOC	+	-	1179.53	-21.245	0.0117647	0.0117647	Junction	FALSE	0.814448	0.0488305
R1_DM	DOC	+	-	4245.96	-43.3603	0.0470588	0.0470588	Junction	FALSE	0.341429	-0.179535
R1_DM	DOC	+	-	1300.55	27.5609	0.0941176	0.0941176	Junction	FALSE	0.7313	0.0688758
R1_DM	DOC	+	-	1192.74	129.258	0.0117647	0.0117647	Junction	FALSE	0.639045	0.0953859
R1_DM	DOC	+	-	3293.72	-16.3218	0.129412	0.129412	Junction	FALSE	0.372915	0.170248
R1_DM	DOC	+	-	2316.15	17.5807	0.0823529	0.105882	Junction	FALSE	0.0312572	-0.328511
R1_DM	DOC	+	-	2229.89	198.111	0.0117647	0.0117647	Junction	FALSE	0.992824	0.00227511
R1_DM	DOC	+	-	640.768	-14.0534	0.0117647	0.0117647	Junction	FALSE	0.610675	-0.10516
R1_DM	DOC	+	-	1331.07	1.7282	0.0352941	0.0470588	Junction	FALSE	0.308056	0.195728
R1_DM	DOC	+	-	948.492	-44.6424	0.0235294	0.0235294	Junction	FALSE	0.916783	0.0236167
R1_DM	DOC	+	-	3775.83	-13.2542	0.0117647	0.0117647	Junction	FALSE	0.5868	-0.112323
R1_DM	DOC	+	-	3088.33	13.4234	0.0117647	0.0117647	Junction	FALSE	0.717681	0.0738988
R1_DM	DOC	+	+	3237.53	4698.53	0.482353	0.482353	Junction	FALSE	0.493977	0.139907
R1_DM	DOC	+	+	4177.75	4827.09	0.0235294	0.0235294	Junction	FALSE	0.591678	-0.1114
R1_DM	DOC	+	+	420.097	4637.93	0.0117647	0.0117647	Junction	FALSE	0.717681	0.0738988
R1_DM	DOC	+	+	3022.03	4780.7	0.0117647	0.0117647	Junction	FALSE	0.635294	-0.0979981
R1_DM	DOC	+	+	2860.21	4672.14	0.0235294	0.0235294	Junction	FALSE	0.593037	0.110231
R1_DM	DOC	+	+	2587.39	4724.56	0.0117647	0.0117647	Junction	FALSE	0.895854	-0.0299556
R1_DM	DOC	+	+	5009.7	4704.83	0.0941176	0.105882	Junction	FALSE	0.177692	0.243406
R1_DM	DOC	+	+	2644.89	4844.39	0.0117647	0.0117647	Junction	FALSE	0.900422	-0.0263744
R1_DM	DOC	+	+	4872.49	4603.67	0.0352941	0.0352941	Junction	FALSE	0.526457	-0.132035
R1_DM	DOC	+	+	2299.45	4708.1	0.0352941	0.0352941	Junction	FALSE	0.614633	0.104436
R1_DM	DOC	+	+	3490.39	4742.59	0.0705882	0.0823529	Junction	FALSE	0.375179	0.169822
R1_DM	DOC	+	+	3638	4729.24	0.0705882	0.0941176	Junction	FALSE	0.67939	0.0860724
R1_DM	DOC	+	+	4535.33	4732.93	0.0117647	0.0117647	Junction	FALSE	0.992824	-0.00130608
R1_DM	DOC	+	+	5227.68	4853.18	0.0117647	0.0117647	Junction	FALSE	0.593037	0.109711
R1_DM	DOC	+	+	252.927	4622.43	0.0117647	0.0117647	Junction	FALSE	0.593037	0.109711
R1_DM	DOC	+	+	3116.37	4630.7	0.0117647	0.0117647	Junction	FALSE	0.673144	-0.0872545
R1_DM	DOC	+	+	1364.39	4806.64	0.0117647	0.0117647	Junction	FALSE	0.900422	-0.0263744
R1_DM	DOC	+	+	2007.6	4807.6	0.0117647	0.0117647	Junction	FALSE	0.717681	0.0738988
R1_DM	DOC	+	+	4403.44	4778.19	0.0235294	0.0235294	Junction	FALSE	0.703905	-0.0808303
R1_DM	NOMAD_LTR	-	-	1165.99	-126.597	0.0117647	0.0235294	Junction	FALSE	0.717681	0.0738988
R1_DM	NOMAD_LTR	-	-	2085.23	0.108641	0.0117647	0.0117647	Junction	FALSE	0.441207	0.152685
R1_DM	S_DM	-	+	2813.5	1849.25	0.0352941	0.0352941	Junction	FALSE	0.366947	0.173494
R1_DM	S_DM	-	+	2470.48	1652.98	0.0470588	0.0470588	Junction	FALSE	0.532836	0.128628
R1_DM	S_DM	+	-	2551.57	-36.0011	0.0705882	0.0941176	Junction	FALSE	0.502253	0.138088
R1_DM	S_DM	+	-	492.413	-91.0319	0.0823529	0.0823529	Junction	FALSE	0.667917	0.0891213
R1_DM	S_DM	+	-	1418.18	-159.177	0.0235294	0.0235294	Junction	FALSE	0.203092	0.232511
R1_DM	S_DM	+	+	465.315	1853.11	0.694118	0.858824	Junction	FALSE	0.29761	0.203185
R1_DM	S_DM	+	+	1424.78	1890.03	0.0235294	0.0235294	Junction	FALSE	0.233932	0.219773
R1_DM	S_DM	+	+	2517.31	1818.18	0.0470588	0.0470588	Junction	FALSE	0.857554	0.0411027
R1_DM	NTS_DM	-	+	2696.71	272.359	0.0235294	0.0235294	Junction	FALSE	0.576326	-0.116495
R1_DM	NTS_DM	-	+	795.149	335.651	0.0235294	0.0235294	Junction	FALSE	0.761417	0.061829
R1_DM	NTS_DM	-	+	2515.1	336.575	0.0235294	0.0235294	Junction	FALSE	0.576326	-0.116495
R1_DM	NTS_DM	-	+	864.107	319.608	0.0117647	0.0117647	Junction	FALSE	0.405843	0.163428
R1_DM	NTS_DM	-	+	1339.64	250.862	0.0117647	0.0117647	Junction	FALSE	0.5868	-0.112323
R1_DM	NTS_DM	-	+	4187.83	317.167	0.0117647	0.0117647	Junction	FALSE	0.75906	-0.0621862
R1_DM	NTS_DM	-	+	3735.57	310.179	0.0235294	0.0235294	Junction	FALSE	0.610675	0.105136
R1_DM	NTS_DM	-	+	1842.63	269.369	0.0117647	0.0117647	Junction	FALSE	0.864879	0.0380869
R1_DM	NTS_DM	-	+	2163.92	231.585	0.0117647	0.0117647	Junction	FALSE	0.746443	-0.0657674
R1_DM	NTS_DM	-	+	4976.49	340.012	0.0117647	0.0117647	Junction	FALSE	0.794085	-0.0550238
R1_DM	NTS_DM	-	+	1086.25	282.75	0.0117647	0.0117647	Junction	FALSE	0.405843	0.163428
R1_DM	NTS_DM	-	+	4017	383.667	0.0117647	0.0117647	Junction	FALSE	0.75906	-0.0621862
R1_DM	NTS_DM	-	+	3133.91	331.136	0.0235294	0.0352941	Junction	FALSE	0.635294	0.0980119
R1_DM	NTS_DM	-	+	3532.12	347.879	0.0117647	0.0117647	Junction	FALSE	0.717681	-0.0729298
R1_DM	NTS_DM	-	-	2030.32	-109.177	0.0117647	0.0117647	Junction	FALSE	0.593037	0.109711
R1_DM	NTS_DM	-	-	5073.87	-78.1318	0.0235294	0.0235294	Junction	FALSE	0.501621	0.138254
R1_DM	NTS_DM	+	-	4546.65	-83.9722	0.2	0.352941	Junction	FALSE	0.814448	0.0497927
R1_DM	NTS_DM	+	-	4735.11	-140.758	0.164706	0.176471	Junction	FALSE	0.743996	0.0662761
R1_DM	NTS_DM	+	-	5058.87	-26.3693	0.0117647	0.0117647	Junction	FALSE	0.864879	0.0380869
R1_DM	NTS_DM	+	-	5416.46	-86.8867	0.0352941	0.0352941	Junction	FALSE	0.22584	0.223718
R1_DM	NTS_DM	+	-	5275.6	-127.097	0.0117647	0.0117647	Junction	FALSE	0.717681	0.0738988
R1_DM	NTS_DM	+	-	1399.71	-17.379	0.0117647	0.0117647	Junction	FALSE	0.717681	-0.0729298
R1_DM	NTS_DM	+	-	5253.96	-14.1632	0.0235294	0.0235294	Junction	FALSE	0.233932	0.219773
R1_DM	NTS_DM	+	-	1542.1	-127.02	0.0117647	0.0117647	Junction	FALSE	0.717681	-0.0729298
R1_DM	BAGGINS1	+	-	2323.16	4717.39	1	3.47059	Junction	FALSE	0.814448	0.0507953
R1_DM	BAGGINS1	+	-	2304.24	5161.58	0.0823529	0.0823529	Junction	FALSE	0.598795	0.108786
R1_DM	BAGGINS1	+	-	2375.42	4941.46	0.0235294	0.0235294	Junction	FALSE	0.530482	-0.129233
R1_DM	BAGGINS1	+	-	2299	4933.14	0.0588235	0.0588235	Junction	FALSE	0.11684	-0.265569
R1_DM	GYPSY5_LTR	-	+	2410.1	423.718	0.0823529	0.0941176	Junction	FALSE	0.14398	0.254144
R1_DM	GYPSY5_LTR	+	-	2437.7	21.5859	0.0705882	0.0705882	Junction	FALSE	0.177332	0.243942
R1_DM	GYPSY12A_LTR	-	-	3043.88	-47.3275	1	1	Junction	FALSE	1	nan
R1_DM	GYPSY12A_LTR	+	+	4528.17	2278.04	0.694118	0.988235	Junction	FALSE	0.203092	0.233012
R1_DM	BS2	+	-	2367.48	2893.46	0.0117647	0.0117647	Junction	FALSE	0.371497	0.170591
R1_DM	BS2	+	-	2151.76	1980.44	0.458824	0.529412	Junction	FALSE	0.370991	0.172807
R1_DM	DMCR1A	+	-	5228.33	2491	0.905882	0.905882	Junction	FALSE	0.923975	0.0210501
R1_DM	DMCR1A	+	-	5162.32	2595.88	0.0117647	0.0117647	Junction	FALSE	0.610675	-0.10516
R1_DM	HOBO	+	-	5079.4	60.4723	0.0117647	0.0117647	Junction	FALSE	0.5868	0.113292
R1_DM	HOBO	+	-	5482.8	-133.299	0.0117647	0.0117647	Junction	FALSE	0.690368	-0.0836733
R1_DM	POGO	-	+	5054.76	2007.88	0.317647	0.317647	Junction	FALSE	0.75906	-0.0637379
R1_DM	POGO	-	+	1274.66	2210.58	0.352941	0.352941	Junction	FALSE	0.635294	-0.0993394
R1_DM	POGO	+	-	5186.34	11.7971	0.4	0.458824	Junction	FALSE	0.685015	-0.0850387
R1_DM	DM176_LTR	-	-	1445.1	-150.153	0.0235294	0.0235294	Junction	FALSE	0.909384	-0.0247856
R1_DM	DM176_LTR	+	+	1639.9	582.562	0.129412	0.129412	Junction	FALSE	0.109803	-0.26921
R1_DM	DOC3_DM	-	-	2360.26	1536.51	0.0235294	0.0235294	Junction	FALSE	0.507822	-0.136875
R1_DM	ACCORD_I	-	+	2328.81	6350.7	0.0941176	0.0941176	Junction	FALSE	0.601949	-0.108331
R1_DM	ACCORD_I	-	+	2884.85	2056.71	0.623529	0.823529	Junction	FALSE	0.336147	0.187444
R1_DM	ACCORD_I	-	+	1380.51	3172.74	0.0823529	0.0823529	Junction	FALSE	0.237626	-0.218498
R1_DM	ZAM_LTR	-	+	2400.54	458.657	0.0470588	0.0470588	Junction	FALSE	0.588277	-0.112067
R1_DM	ZAM_LTR	-	+	3152.35	489.758	0.0117647	0.0117647	Junction	FALSE	0.864879	0.0380869
R1_DM	ZAM_LTR	-	+	1475.65	373.854	0.0117647	0.0117647	Junction	FALSE	0.526457	-0.130229
R1_DM	ZAM_LTR	+	-	2497.34	81.8639	0.0352941	0.0352941	Junction	FALSE	0.653116	-0.092274
R1_DM	ZAM_LTR	+	-	1648.35	57.3127	0.0117647	0.0117647	Junction	FALSE	0.526457	-0.130229
R1_DM	ZAM_LTR	+	-	3122.12	13.8807	0.0117647	0.0117647	Junction	FALSE	0.864879	0.0380869
R1_DM	ZAM_LTR	+	-	2213.11	-39.1059	0.0235294	0.0235294	Junction	FALSE	0.849731	-0.042618
R1_DM	STALKER3_LTR	-	+	-3.60042	368.649	0.0470588	0.0470588	Junction	FALSE	0.69447	-0.0828919
R1_DM	STALKER3_LTR	-	-	4811.47	101.379	0.141176	0.141176	Junction	FALSE	0.923483	-0.0214876
R1_DM	STALKER3_LTR	+	+	4505.26	530.597	0.0117647	0.0117647	Junction	FALSE	0.426165	0.156266
R1_DM	G_DM	-	-	1228.58	-145.15	0.658824	0.658824	Junction	FALSE	0.688894	0.0843596
R1_DM	G_DM	+	-	2376.61	1747.55	0.341176	0.341176	Junction	FALSE	0.0911714	-0.283904
R1_DM	G_DM	+	+	978.748	3518.52	0.835294	1.57647	Junction	FALSE	0.0625332	0.300109
R1_DM	G_DM	+	+	3885.01	4488.01	0.0117647	0.0117647	Junction	FALSE	0.639045	-0.0944169
R1_DM	G_DM	+	+	3702.91	3554.8	0.0117647	0.0117647	Junction	FALSE	0.98536	0.00585629
R1_DM	ROOA_I	-	-	128.007	6583.41	0.388235	0.4	Junction	FALSE	0.814448	-0.0514504
R1_DM	ROOA_I	+	+	5355.7	6735.43	1	2.32941	Junction	FALSE	0.701873	0.0815817
R1_DM	TC1_DM	-	+	4814.62	681.644	0.952941	2.8	Junction	FALSE	0.635294	0.0983063
R1_DM	TC1_DM	-	+	4654.81	497.606	0.129412	0.141176	Junction	FALSE	0.576326	0.11937
R1_DM	TC1_DM	-	+	4982.57	697.611	0.0470588	0.117647	Junction	FALSE	0.576326	-0.118462
R1_DM	TC1_DM	-	+	4814.3	507.357	0.0235294	0.0235294	Junction	FALSE	0.867035	-0.037523
R1_DM	TC1_DM	+	-	5356.47	681.165	1	1.32941	Junction	FALSE	0.426165	0.157604
R1_DM	FW	-	+	1877.79	4401.2	0.858824	2.28235	Junction	FALSE	0.992824	0.00215581
R1_DM	FW	-	+	4306.58	4710.98	0.435294	0.623529	Junction	FALSE	0.868287	0.0367901
R1_DM	FW	-	+	1718.9	4729.61	0.0235294	0.0352941	Junction	FALSE	0.371497	-0.17073
R1_DM	FW	-	+	2850.42	4490.5	0.0705882	0.0705882	Junction	FALSE	0.202471	-0.233957
R1_DM	FW	-	+	-43.9597	4680.01	0.0352941	0.0352941	Junction	FALSE	0.963891	-0.0127529
R1_DM	FW	-	+	4662.84	4858.16	0.0117647	0.0117647	Junction	FALSE	0.814448	0.0488305
R1_DM	FW	-	+	4719.7	4692.73	0.141176	0.141176	Junction	FALSE	0.61711	0.102715
R1_DM	FW	-	+	115.833	4688.97	0.0470588	0.0470588	Junction	FALSE	0.109803	0.269034
R1_DM	FW	-	+	4736.28	4842.22	0.0117647	0.0117647	Junction	FALSE	0.992824	0.00227511
R1_DM	FW	-	+	345.83	4759.97	0.0117647	0.0117647	Junction	FALSE	0.474952	0.145522
R1_DM	FW	-	+	531.394	4687.16	0.0705882	0.0823529	Junction	FALSE	0.0207228	0.344002
R1_DM	FW	-	+	1093	1942.89	0.0352941	0.0352941	Junction	FALSE	0.341429	0.181864
R1_DM	FW	-	+	1749.3	4685.43	0.0117647	0.0235294	Junction	FALSE	0.635294	-0.0979981
R1_DM	FW	-	+	2244.99	4856.01	0.0117647	0.0117647	Junction	FALSE	0.741591	0.0667364
R1_DM	FW	-	+	2262.01	4590.04	0.0235294	0.0235294	Junction	FALSE	0.526457	0.130611
R1_DM	FW	-	+	1404.74	4680.84	0.0117647	0.0117647	Junction	FALSE	0.371497	0.170591
R1_DM	FW	-	+	2584.15	4685.85	0.0235294	0.0235294	Junction	FALSE	0.895854	-0.0298805
R1_DM	FW	-	+	4440.59	4678.41	0.0117647	0.0117647	Junction	FALSE	0.814448	0.0488305
R1_DM	FW	-	-	1452.42	16.86	0.517647	0.529412	Junction	FALSE	0.0177632	0.349475
R1_DM	FW	-	-	3592.49	3533.21	0.564706	0.564706	Junction	FALSE	0.0954995	0.280765
R1_DM	FW	-	-	958.256	-106.95	0.752941	0.752941	Junction	FALSE	0.0647454	0.297828
R1_DM	FW	-	-	2851.35	479.724	0.988235	1.12941	Junction	FALSE	0.20303	0.233319
R1_DM	FW	-	-	3820.63	2838.93	0.2	0.258824	Junction	FALSE	0.307181	-0.19645
R1_DM	FW	-	-	1756.59	-124.157	0.141176	0.141176	Junction	FALSE	0.0102979	0.366647
R1_DM	FW	-	-	724.53	1231.53	0.0117647	0.0117647	Junction	FALSE	0.895854	0.0309246
R1_DM	FW	-	-	3083.97	4373.97	0.0470588	0.0470588	Junction	FALSE	0.307181	0.196096
R1_DM	FW	-	-	1201.59	506.753	0.0352941	0.0352941	Junction	FALSE	0.306337	-0.201092
R1_DM	FW	-	-	4520.75	-28.9304	0.0470588	0.0588235	Junction	FALSE	0.341429	-0.183976
R1_DM	FW	-	-	2864.25	1382.25	0.0117647	0.0117647	Junction	FALSE	0.717681	-0.0765109
R1_DM	FW	-	-	1326.49	2682.99	0.270588	0.341176	Junction	FALSE	0.0624588	-0.300376
R1_DM	FW	-	-	2153	457.625	0.0117647	0.0117647	Junction	FALSE	0.420974	-0.158878
R1_DM	FW	-	-	2499.8	927.795	0.0117647	0.0117647	Junction	FALSE	0.673144	-0.0872545
R1_DM	FW	-	-	1408.33	124.656	0.235294	0.270588	Junction	FALSE	0.779554	-0.0582102
R1_DM	FW	-	-	61.8804	1660.53	0.0235294	0.0235294	Junction	FALSE	0.233932	0.219773
R1_DM	FW	-	-	4288.13	4220.23	0.0470588	0.0470588	Junction	FALSE	0.307181	0.196096
R1_DM	FW	-	-	2826.04	-41.8254	0.0235294	0.0235294	Junction	FALSE	0.835001	-0.0451655
R1_DM	FW	-	-	2023.17	-127.478	0.141176	0.141176	Junction	FALSE	0.427255	-0.155671
R1_DM	FW	-	-	1282.08	-142.293	0.0470588	0.0470588	Junction	FALSE	0.341429	0.183332
R1_DM	FW	-	-	1882.49	335.309	0.0235294	0.0235294	Junction	FALSE	0.345898	-0.177635
R1_DM	FW	-	-	4098.97	3733.61	0.0117647	0.0117647	Junction	FALSE	0.98536	0.00585629
R1_DM	FW	-	-	139.654	-7.7744	0.0352941	0.0352941	Junction	FALSE	0.635294	0.0981581
R1_DM	FW	-	-	109.611	-55.6394	0.0117647	0.0117647	Junction	FALSE	0.639045	-0.0944169
R1_DM	FW	-	-	3155.44	310.108	0.0235294	0.0235294	Junction	FALSE	0.727237	-0.0706404
R1_DM	FW	-	-	149.972	2191.17	0.0117647	0.0117647	Junction	FALSE	0.916813	-0.0227932
R1_DM	FW	-	-	2342.34	-64.8964	0.0588235	0.0588235	Junction	FALSE	0.610675	0.10532
R1_DM	FW	-	-	1806.88	-17.8238	0.0470588	0.0470588	Junction	FALSE	0.816241	0.0483965
R1_DM	FW	-	-	1306.82	536.939	0.0588235	0.0588235	Junction	FALSE	0.345898	0.177529
R1_DM	FW	-	-	3226.54	99.2941	0.0235294	0.0235294	Junction	FALSE	0.401754	-0.164897
R1_DM	FW	-	-	3440.71	3467.71	0.0117647	0.0117647	Junction	FALSE	0.532836	0.127617
R1_DM	FW	-	-	2436.34	1286.77	0.0117647	0.0117647	Junction	FALSE	0.916813	-0.0227932
R1_DM	FW	-	-	469.606	2520.94	0.0117647	0.0117647	Junction	FALSE	0.474952	-0.144553
R1_DM	FW	-	-	1941.53	11.2483	0.0470588	0.0470588	Junction	FALSE	0.426165	0.15598
R1_DM	FW	-	-	1129.64	1174.32	0.0235294	0.0235294	Junction	FALSE	0.980392	-0.00950063
R1_DM	FW	-	-	583.273	430.273	0.0117647	0.0117647	Junction	FALSE	0.474952	-0.144553
R1_DM	FW	-	-	2230.07	119.568	0.0117647	0.0117647	Junction	FALSE	0.838695	-0.0442803
R1_DM	FW	-	-	732.903	4447.9	0.0117647	0.0117647	Junction	FALSE	0.717681	0.0738988
R1_DM	FW	-	-	97.1743	954.862	0.0235294	0.0235294	Junction	FALSE	0.233932	0.219773
R1_DM	FW	-	-	1583.23	2549.23	0.0117647	0.0117647	Junction	FALSE	0.576326	-0.115904
R1_DM	FW	+	-	3251.71	611.997	0.894118	0.929412	Junction	FALSE	0.227736	0.223065
R1_DM	FW	+	-	1967.56	-101.086	0.0235294	0.0235294	Junction	FALSE	0.727237	-0.0706404
R1_DM	FW	+	-	3246.97	723.628	0.364706	0.364706	Junction	FALSE	0.633131	0.100031
R1_DM	FW	+	-	403.351	2193.34	0.823529	0.882353	Junction	FALSE	0.717681	-0.0733188
R1_DM	FW	+	-	278.57	139.83	0.0117647	0.0117647	Junction	FALSE	0.474952	0.145522
R1_DM	FW	+	-	2760.31	3172.92	0.447059	0.447059	Junction	FALSE	0.8528	-0.0418295
R1_DM	FW	+	-	4250.86	-22.6539	0.447059	0.505882	Junction	FALSE	0.921997	0.0218058
R1_DM	FW	+	-	1504.75	71.7536	0.0117647	0.0117647	Junction	FALSE	0.371497	0.170591
R1_DM	FW	+	-	3568.26	3297.99	0.0235294	0.0235294	Junction	FALSE	0.717681	0.077114
R1_DM	FW	+	-	5525.6	1949.83	0.0588235	0.0588235	Junction	FALSE	0.870627	0.0363939
R1_DM	FW	+	-	424.333	1386.18	0.0235294	0.0352941	Junction	FALSE	0.313175	0.194566
R1_DM	FW	+	-	4760.68	2312.37	0.141176	0.164706	Junction	FALSE	0.717681	0.078087
R1_DM	FW	+	-	5340.26	226.469	0.0352941	0.0352941	Junction	FALSE	0.963891	-0.0127529
R1_DM	FW	+	-	2680.31	75.137	0.0235294	0.0235294	Junction	FALSE	0.895854	-0.0298805
R1_DM	FW	+	-	1711.09	16.8276	0.0235294	0.0235294	Junction	FALSE	0.345898	-0.177635
R1_DM	FW	+	-	2819.12	3600.33	0.141176	0.141176	Junction	FALSE	0.11883	-0.264349
R1_DM	FW	+	-	4471.72	2608.28	0.0117647	0.0117647	Junction	FALSE	0.814448	0.0488305
R1_DM	FW	+	-	503.428	4.57163	0.0117647	0.0117647	Junction	FALSE	0.794085	-0.0550238
R1_DM	FW	+	-	5423.71	837.96	0.0352941	0.0352941	Junction	FALSE	0.22584	0.223718
R1_DM	FW	+	-	5432.27	-91.52	0.0117647	0.0117647	Junction	FALSE	0.474952	0.145522
R1_DM	FW	+	-	557.273	1512.99	0.0588235	0.0588235	Junction	FALSE	0.0210514	0.34328
R1_DM	FW	+	-	1783.5	2083.37	0.0117647	0.0117647	Junction	FALSE	0.635294	-0.0979981
R1_DM	FW	+	+	727.15	4790.24	0.694118	0.717647	Junction	FALSE	0.0107056	0.365327
R1_DM	FW	+	+	2465.76	4574.8	0.0705882	0.0705882	Junction	FALSE	0.498592	-0.13898
R1_DM	FW	+	+	2716.37	4775.31	0.0941176	0.0941176	Junction	FALSE	0.484974	-0.141392
R1_DM	FW	+	+	2624.73	4584.23	0.0117647	0.0117647	Junction	FALSE	0.916813	-0.0227932
R1_DM	FW	+	+	338.793	4833.79	0.0117647	0.0117647	Junction	FALSE	0.593037	0.109711
R1_DM	FW	+	+	976.078	4680.64	0.270588	0.282353	Junction	FALSE	0.168177	-0.246638
R1_DM	FW	+	+	1947.13	4714.45	0.0470588	0.0470588	Junction	FALSE	0.426165	0.15598
R1_DM	FW	+	+	4869.59	3667	0.0470588	0.0470588	Junction	FALSE	0.307181	0.196096
R1_DM	FW	+	+	2712.04	4572.04	0.0117647	0.0117647	Junction	FALSE	0.673144	-0.0872545
R1_DM	FW	+	+	279.088	4523.37	0.0470588	0.0470588	Junction	FALSE	0.392119	0.166921
R1_DM	FW	+	+	1033.56	4184.33	0.235294	0.282353	Junction	FALSE	0.814448	-0.0503227
R1_DM	FW	+	+	1970.76	4561.43	0.0235294	0.0235294	Junction	FALSE	0.673144	0.0873039
R1_DM	FW	+	+	1314.69	4532.79	0.0470588	0.0470588	Junction	FALSE	0.954624	0.0155744
R1_DM	FW	+	+	1588.21	4808.93	0.0588235	0.0588235	Junction	FALSE	0.69727	0.0823448
R1_DM	FW	+	+	5481.77	4749.94	0.0470588	0.0470588	Junction	FALSE	0.593037	0.110394
R1_DM	FW	+	+	4834.93	4866.26	0.0117647	0.0117647	Junction	FALSE	0.717681	0.0738988
R1_DM	FW	+	+	580.506	4122.02	0.0352941	0.0352941	Junction	FALSE	0.72608	-0.0713474
R1_DM	FW	+	+	1375.41	3829.85	0.0588235	0.0588235	Junction	FALSE	0.14398	0.254661
R1_DM	FW	+	+	1113.95	4658.75	0.0235294	0.0235294	Junction	FALSE	0.826905	0.0465441
R1_DM	FW	+	+	266.692	4586.61	0.0470588	0.0470588	Junction	FALSE	0.900422	0.0283386
R1_DM	FW	+	+	2341.56	4840.56	0.0117647	0.0117647	Junction	FALSE	0.916813	-0.0227932
R1_DM	FW	+	+	3302.18	4746.51	0.0117647	0.0117647	Junction	FALSE	0.576326	-0.119485
R1_DM	FW	+	+	921.708	4377.62	0.0352941	0.0352941	Junction	FALSE	0.663561	0.0897874
R1_DM	FW	+	+	1476.15	4767.85	0.0470588	0.0588235	Junction	FALSE	0.555944	-0.123486
R1_DM	FW	+	+	5408.67	4746.09	0.0352941	0.0352941	Junction	FALSE	0.183792	0.240459
R1_DM	FW	+	+	1146.35	4694.02	0.0352941	0.0352941	Junction	FALSE	0.717681	0.0751388
R1_DM	FW	+	+	1231.06	4703.5	1	7.43529	Junction	FALSE	0.0189829	0.347048
R1_DM	FW	+	+	4478.31	4703.81	0.0352941	0.0470588	Junction	FALSE	0.341429	-0.182316
R1_DM	FW	+	+	5250.37	4779.06	0.0470588	0.0470588	Junction	FALSE	0.526457	0.132275
R1_DM	FW	+	+	1023.1	4848.33	0.0705882	0.0705882	Junction	FALSE	0.681733	0.0856476
R1_DM	FW	+	+	621.213	4728.07	0.0823529	0.0823529	Junction	FALSE	0.773115	-0.0597722
R1_DM	FW	+	+	431.713	4516.62	0.0117647	0.0117647	Junction	FALSE	0.895854	-0.0299556
R1_DM	DM297_LTR	+	-	5494.66	-106.622	0.0235294	0.0235294	Junction	FALSE	0.768691	-0.0604504
R1_DM	DM297_LTR	+	-	1680.5	-135.5	0.0117647	0.0117647	Junction	FALSE	0.420974	-0.158878
R1_DM	emb_X15366_DMSAT07_Drosophila	-	+	3340.25	261.75	0.0117647	0.0117647	Junction	FALSE	0.405843	0.163428
R1_DM	emb_X15366_DMSAT07_Drosophila	-	+	2394.5	255.5	0.0117647	0.0117647	Junction	FALSE	0.420974	-0.158878
R1_DM	emb_X15366_DMSAT07_Drosophila	-	+	3483.64	273.361	0.0117647	0.0117647	Junction	FALSE	0.341429	-0.180365
R1_DM	emb_X15366_DMSAT07_Drosophila	-	+	4059.2	252.47	0.0117647	0.0117647	Junction	FALSE	0.895854	0.0309246
R1_DM	emb_X15366_DMSAT07_Drosophila	-	+	4420.25	267.417	0.0117647	0.0117647	Junction	FALSE	0.405843	0.163428
R1_DM	emb_X15366_DMSAT07_Drosophila	-	+	1399.61	243.887	0.0117647	0.0117647	Junction	FALSE	0.526457	0.131198
R1_DM	emb_X15366_DMSAT07_Drosophila	-	+	4904.06	237.437	0.0117647	0.0117647	Junction	FALSE	0.483406	0.141941
R1_DM	emb_X15366_DMSAT07_Drosophila	-	+	124.667	294.333	0.0117647	0.0117647	Junction	FALSE	0.519938	0.134779
R1_DM	emb_X15366_DMSAT07_Drosophila	-	-	3129.78	-150.223	0.0235294	0.0235294	Junction	FALSE	0.341429	0.181561
R1_DM	emb_X15366_DMSAT07_Drosophila	-	-	4390.38	-127.622	0.0117647	0.0117647	Junction	FALSE	0.610675	-0.10516
R1_DM	emb_X15366_DMSAT07_Drosophila	-	-	611.073	-157.927	0.0117647	0.0117647	Junction	FALSE	0.5868	0.113292
R1_DM	emb_X15366_DMSAT07_Drosophila	-	-	1202.52	-141.482	0.0117647	0.0117647	Junction	FALSE	0.483406	0.141941
R1_DM	emb_X15366_DMSAT07_Drosophila	-	-	-17.3865	-162.387	0.0117647	0.0117647	Junction	FALSE	0.526457	0.131198
R1_DM	emb_X15366_DMSAT07_Drosophila	-	-	3673.71	-158.042	0.0235294	0.0235294	Junction	FALSE	0.258692	0.212131
R1_DM	emb_X15366_DMSAT07_Drosophila	+	-	2745.93	-159.927	0.0117647	0.0117647	Junction	FALSE	0.5868	0.113292
R1_DM	emb_X15366_DMSAT07_Drosophila	+	-	2668.37	-157.371	0.0117647	0.0117647	Junction	FALSE	0.576326	-0.115904
R1_DM	emb_X15366_DMSAT07_Drosophila	+	-	3531.95	-157.952	0.0117647	0.0117647	Junction	FALSE	0.717681	0.0738988
R1_DM	emb_X15366_DMSAT07_Drosophila	+	-	3144.67	-167.168	0.0117647	0.0117647	Junction	FALSE	0.98536	0.00585629
R1_DM	emb_X15366_DMSAT07_Drosophila	+	+	2490.42	260.422	0.0235294	0.0235294	Junction	FALSE	0.895854	0.0312592
R1_DM	emb_X15366_DMSAT07_Drosophila	+	+	1289.42	259.418	0.0235294	0.0235294	Junction	FALSE	0.420974	0.158634
R1_DM	emb_X15366_DMSAT07_Drosophila	+	+	4796.08	254.083	0.0117647	0.0117647	Junction	FALSE	0.341429	0.181334
R1_DM	emb_X15366_DMSAT07_Drosophila	+	+	3403	249.999	0.0235294	0.0235294	Junction	FALSE	0.673144	0.0873039
R1_DM	emb_X15366_DMSAT07_Drosophila	+	+	837.993	256.493	0.0117647	0.0117647	Junction	FALSE	0.525765	-0.13381
R1_DM	emb_L36594_DMHCHRMA_Drosophila	-	-	4432.27	-99.3492	0.705882	0.717647	Junction	FALSE	0.672319	0.0883042
R1_DM	DOC2_DM	-	+	1436.45	4862.82	0.576471	1.49412	Junction	FALSE	0.11684	-0.265275
R1_DM	DOC2_DM	+	-	1501.8	176.219	0.247059	0.388235	Junction	FALSE	0.131731	-0.259315
R1_DM	DOC2_DM	+	-	731.235	-101.035	0.247059	0.247059	Junction	FALSE	0.483406	-0.142047
R1_DM	DOC2_DM	+	-	1295.14	-96.8389	0.2	0.235294	Junction	FALSE	0.20303	-0.233215
R1_DM	DOC2_DM	+	-	797.212	-170.712	0.0117647	0.0117647	Junction	FALSE	0.717681	-0.0729298
R1_DM	Circe_I	-	+	781.769	7095.7	0.0352941	0.0352941	Junction	FALSE	0.420974	0.158845
R1_DM	Circe_I	-	-	2749.79	-100.627	0.964706	1.35294	Junction	FALSE	0.546398	0.125173
R1_DM	Circe_I	-	-	3877.92	1662.91	0.164706	0.164706	Junction	FALSE	0.29761	-0.203116
R1_DM	Circe_I	-	-	2919.12	1877.56	0.176471	0.176471	Junction	FALSE	0.237626	-0.218253
R1_DM	Circe_I	-	-	1635.99	6189.65	0.0470588	0.0470588	Junction	FALSE	0.307181	0.196096
R1_DM	Circe_I	-	-	4753.91	2719.07	0.0117647	0.0117647	Junction	FALSE	0.371497	0.170591
R1_DM	Circe_I	-	-	2098.65	-133.854	0.0117647	0.0117647	Junction	FALSE	0.526457	-0.130229
R1_DM	Circe_I	+	-	2079.32	1922.24	0.0352941	0.0352941	Junction	FALSE	0.907028	-0.0253089
R1_DM	Circe_I	+	-	4298.63	2294.65	0.0352941	0.0352941	Junction	FALSE	0.702565	0.0814168
R1_DM	Circe_I	+	-	4634.69	2241.32	0.0470588	0.0470588	Junction	FALSE	0.794085	-0.0555401
R1_DM	Circe_I	+	+	1478.26	6809.12	0.764706	0.776471	Junction	FALSE	0.526457	0.131276
R1_DM	Circe_I	+	+	4968.1	6893.6	0.694118	0.694118	Junction	FALSE	0.341429	0.180578
R1_DM	Circe_I	+	+	289.661	6792.62	0.847059	1	Junction	FALSE	0.0902994	0.284459
R1_DM	Circe_I	+	+	1117.78	7026.32	0.0823529	0.0823529	Junction	FALSE	0.14398	0.253466
R1_DM	Circe_I	+	+	4723.3	2732.99	0.0823529	0.0941176	Junction	FALSE	0.14398	0.254144
R1_DM	Circe_I	+	+	2550.46	6919.33	0.0352941	0.0352941	Junction	FALSE	0.420974	0.158845
R1_DM	Circe_I	+	+	3467.22	657.698	0.0823529	0.0941176	Junction	FALSE	0.677325	-0.0865373
R1_DM	Circe_I	+	+	4774.7	2154.78	0.176471	0.188235	Junction	FALSE	0.21349	-0.2279
R1_DM	Circe_I	+	+	1508.21	6856.59	0.0823529	0.0823529	Junction	FALSE	0.336147	0.187447
R1_DM	Circe_I	+	+	4450.86	2353.15	0.0705882	0.0705882	Junction	FALSE	0.814448	-0.0500335
R1_DM	Circe_I	+	+	4417.89	2928.26	0.0705882	0.0705882	Junction	FALSE	0.241308	0.216806
R1_DM	M4DM	+	-	2372.63	-22.0934	0.0588235	0.0588235	Junction	FALSE	0.867035	-0.0374558
R1_DM	(GAGAA)n_(TTCTC)n	-	+	604.002	271.498	0.0117647	0.0117647	Junction	FALSE	0.963891	0.0130187
R1_DM	(GAGAA)n_(TTCTC)n	-	+	4262.67	510.328	0.0117647	0.0117647	Junction	FALSE	0.537373	-0.126648
R1_DM	(GAGAA)n_(TTCTC)n	-	+	1881.61	582.89	0.0235294	0.0235294	Junction	FALSE	0.722282	0.072019
R1_DM	(GAGAA)n_(TTCTC)n	-	-	1521.21	-116.791	0.0117647	0.0117647	Junction	FALSE	0.61711	0.102548
R1_DM	(GAGAA)n_(TTCTC)n	-	-	3558.84	234.838	0.0117647	0.0117647	Junction	FALSE	0.814448	0.0488305
R1_DM	(GAGAA)n_(TTCTC)n	+	-	4074.36	198.638	0.0117647	0.0117647	Junction	FALSE	0.5868	-0.112323
R1_DM	(GAGAA)n_(TTCTC)n	+	-	3547.12	-41.116	0.0117647	0.0117647	Junction	FALSE	0.108345	-0.269895
R1_DM	(GAGAA)n_(TTCTC)n	+	-	1576.71	42.9543	0.0117647	0.0117647	Junction	FALSE	0.717681	-0.0729298
R1_DM	(GAGAA)n_(TTCTC)n	+	+	1291.62	428.621	0.0117647	0.0117647	Junction	FALSE	0.108345	-0.269895
R1_DM	(GAGAA)n_(TTCTC)n	+	+	3269.45	398.784	0.0117647	0.0117647	Junction	FALSE	0.639045	0.0953859
R1_DM	(GAGAA)n_(TTCTC)n	+	+	3333.78	496.451	0.0117647	0.0117647	Junction	FALSE	0.639045	0.0953859
R1_DM	(GAGAA)n_(TTCTC)n	+	+	2431.79	418.791	0.0117647	0.0117647	Junction	FALSE	0.61711	0.102548
R1_DM	(GAGAA)n_(TTCTC)n	+	+	2637.45	478.948	0.0117647	0.0117647	Junction	FALSE	0.653116	0.0918047
R1_DM	MDG1_LTR	-	+	259.986	427.681	0.0117647	0.0117647	Junction	FALSE	0.639045	-0.0944169
R1_DM	MDG1_LTR	-	+	-92.6895	504.871	0.905882	0.941176	Junction	FALSE	0.273881	0.208712
R1_DM	MDG1_LTR	-	+	5116.47	337.694	0.258824	0.258824	Junction	FALSE	0.884012	-0.0344042
R1_DM	MDG1_LTR	-	+	3918.96	482.152	0.0470588	0.0588235	Junction	FALSE	0.702565	0.0813538
R1_DM	MDG1_LTR	-	+	194.128	449.572	0.0117647	0.0117647	Junction	FALSE	0.610675	-0.10516
R1_DM	MDG1_LTR	-	-	3855.06	-106.442	0.0117647	0.0117647	Junction	FALSE	0.835001	0.0452493
R1_DM	MDG1_LTR	-	-	3611.54	129.541	0.0117647	0.0117647	Junction	FALSE	0.593037	0.109711
R1_DM	MDG1_LTR	+	-	5195.59	80.776	0.223529	0.223529	Junction	FALSE	0.526457	-0.132477
R1_DM	MDG1_LTR	+	-	3408.68	-152.175	0.0117647	0.0117647	Junction	FALSE	0.371497	0.170591
R1_DM	MDG1_LTR	+	+	1448.79	560.355	0.0705882	0.0705882	Junction	FALSE	0.20303	0.233389
R1_DM	MDG1_LTR	+	+	3787.09	406.127	0.0352941	0.0352941	Junction	FALSE	0.741591	-0.0671621
R1_DM	DM412_I	-	+	4927.23	6213.77	0.0117647	0.0117647	Junction	FALSE	0.992824	0.00227511
R1_DM	DM412_I	-	+	4504.23	6076.77	0.0117647	0.0117647	Junction	FALSE	0.992824	0.00227511
R1_DM	DM412_I	+	+	5328.21	2037.67	0.0352941	0.0352941	Junction	FALSE	0.22584	0.223718
R1_DM	DM359	-	+	55.633	392.867	0.0117647	0.0117647	Junction	FALSE	0.707065	-0.0800921
R1_DM	DM359	-	+	2040.65	435.851	0.0117647	0.0117647	Junction	FALSE	0.900422	-0.0263744
R1_DM	DM359	-	+	-26.5666	388.567	0.0117647	0.0117647	Junction	FALSE	0.895854	0.0309246
R1_DM	DM359	-	+	871.883	344.617	0.0117647	0.0117647	Junction	FALSE	0.639045	0.0953859
R1_DM	DM359	-	+	3759.29	464.046	0.0117647	0.0117647	Junction	FALSE	0.717681	-0.0729298
R1_DM	DM359	-	+	4438.58	406.258	0.0235294	0.0235294	Junction	FALSE	0.5868	-0.113948
R1_DM	DM359	-	+	4792.25	424.25	0.0117647	0.0117647	Junction	FALSE	0.405843	0.163428
R1_DM	DM359	-	-	3840.34	23.9481	0.141176	0.141176	Junction	FALSE	0.20303	-0.233298
R1_DM	DM359	-	-	4214.01	143.347	0.0117647	0.0117647	Junction	FALSE	0.5868	0.113292
R1_DM	DM359	-	-	4038.96	30.7609	0.305882	0.305882	Junction	FALSE	0.371497	0.170552
R1_DM	DM359	-	-	1216.74	64.7383	0.0117647	0.0117647	Junction	FALSE	0.794085	-0.0550238
R1_DM	DM359	+	-	520.817	41.6834	0.0117647	0.0117647	Junction	FALSE	0.895854	0.0309246
R1_DM	DM359	+	-	5396.39	125.106	0.0117647	0.0117647	Junction	FALSE	0.900422	-0.0263744
R1_DM	DM359	+	-	1734.52	-16.0152	0.0117647	0.0117647	Junction	FALSE	0.635294	-0.0979981
R1_DM	DM359	+	-	5179.08	117.918	0.0117647	0.0117647	Junction	FALSE	0.61711	0.102548
R1_DM	DM359	+	-	3465.39	-102.387	0.0117647	0.0117647	Junction	FALSE	0.526457	0.131198
R1_DM	DM359	+	+	4719.8	418.795	0.0235294	0.0235294	Junction	FALSE	0.982129	0.00833179
R1_DM	DM359	+	+	1923.35	460.351	0.0117647	0.0117647	Junction	FALSE	0.900422	-0.0263744
R1_DM	DM359	+	+	4812.37	518.038	0.0117647	0.0117647	Junction	FALSE	0.341429	0.184915
R1_DM	DM359	+	+	3391.68	496.677	0.0117647	0.0117647	Junction	FALSE	0.593037	0.109711
R1_DM	DM359	+	+	1470.04	378.538	0.0117647	0.0117647	Junction	FALSE	0.341429	0.184915
R1_DM	DM359	+	+	5141.02	442.515	0.0117647	0.0117647	Junction	FALSE	0.635294	-0.0979981
R1_DM	U	-	-	193.603	3.64468e+06	0.752941	0.752941	Junction	FALSE	0.643763	0.0937006
R1_DM	U	-	-	655.546	3.64468e+06	0.0117647	0.0117647	Junction	FALSE	0.441207	0.152685
R1_DM	U	-	-	1372.99	3.64469e+06	0.0117647	0.0117647	Junction	FALSE	0.576326	-0.119485
R1_DM	U	+	-	2090.87	307976	0.341176	0.341176	Junction	FALSE	0.345898	0.178713
R1_DM	U	+	-	2115.52	2.26933e+06	0.611765	0.623529	Junction	FALSE	0.724497	-0.0716733
R1_DM	U	+	+	5134.66	3.64507e+06	0.529412	0.564706	Junction	FALSE	0.307181	0.195986
R1_DM	U	+	+	4935.86	3.64507e+06	0.152941	0.152941	Junction	FALSE	0.307181	0.197677
R1_DM	DM1731_I	-	-	591.429	950.115	0.458824	0.458824	Junction	FALSE	0.710252	0.0796432
R1_DM	DM1731_I	-	-	-113.831	1105.36	0.564706	0.564706	Junction	FALSE	0.571304	0.121104
R1_DM	DM1731_I	-	-	1007.36	1671.77	0.0705882	0.0823529	Junction	FALSE	0.526457	-0.133153
R1_DM	DM1731_I	+	+	5135.25	1096.22	0.682353	0.682353	Junction	FALSE	0.867156	0.0371967
R1_DM	DM1731_I	+	+	5421.29	956.299	0.847059	0.870588	Junction	FALSE	0.900422	0.0270647
R1_DM	Y	-	+	1705.44	418376	0	0	Junction	FALSE	1	nan
R1_DM	Unmapped_Scaffold	+	+	2195.65	160539	0.0352941	0.0352941	Junction	FALSE	0.106033	-0.274335
R1_DM	Unmapped_Scaffold	+	+	1708.96	160537	0.0117647	0.0117647	Junction	FALSE	0.593037	0.109711
R1_DM	BLOOD_I	-	-	3078.7	-168.867	0.0823529	0.0823529	Junction	FALSE	0.177432	0.243633
R1_DM	BLOOD_I	+	+	3500.7	6733.79	0.0352941	0.0352941	Junction	FALSE	0.950087	0.0165443
R1_DM	DIVER_I	-	+	1325.67	5775.17	0.752941	0.764706	Junction	FALSE	0.41218	-0.162401
R1_DM	DIVER_I	-	+	1353	5522.76	0.0941176	0.0941176	Junction	FALSE	0.332681	-0.189
R1_DM	DIVER_I	-	+	-140.979	5706.91	0.129412	0.129412	Junction	FALSE	0.738505	0.0678609
R1_DM	DIVER_I	-	+	505	5797.5	0.0117647	0.0117647	Junction	FALSE	0.420974	-0.158878
R1_DM	DIVER_I	-	-	4786.29	-130.677	0.0705882	0.0705882	Junction	FALSE	0.0980867	-0.279184
R1_DM	DIVER_I	-	-	1133.3	-59.3713	0.0117647	0.0117647	Junction	FALSE	0.673144	-0.0872545
R1_DM	DIVER_I	+	-	1587.07	-131.875	0.670588	0.670588	Junction	FALSE	0.420974	0.160382
R1_DM	DIVER_I	+	-	1898.12	3628.66	0.141176	0.141176	Junction	FALSE	0.307181	-0.20003
R1_DM	DIVER_I	+	-	5490.06	-158.853	0.188235	0.188235	Junction	FALSE	0.576326	-0.117389
R1_DM	DIVER_I	+	+	4941.99	5772.22	0.0705882	0.0705882	Junction	FALSE	0.11883	-0.264108
R1_DM	DIVER_I	+	+	1424.37	5791.37	0.0117647	0.0117647	Junction	FALSE	0.673144	-0.0872545
R1_DM	ROOA_LTR	-	-	-84.6007	97.1146	0.552941	0.552941	Junction	FALSE	0.921997	-0.0218559
R1_DM	ROOA_LTR	-	-	24.8412	-166.195	0.247059	0.247059	Junction	FALSE	0.779859	-0.0578888
R1_DM	BEL_I	-	-	24.781	-30.5826	0.0117647	0.0117647	Junction	FALSE	0.814448	0.0488305
R1_DM	BEL_I	-	-	4271.63	-170.875	0.0235294	0.0235294	Junction	FALSE	0.323737	0.191751
R1_DM	BEL_I	+	+	420.589	5566.09	0.0117647	0.0117647	Junction	FALSE	0.576326	-0.115904
R1_DM	BEL_I	+	+	4643.78	5571.98	0.0117647	0.0117647	Junction	FALSE	0.341429	0.181334

## Sheet: Bari1
Anchor	Target	Anchor Strand	Target Strand	Anchor Pos	Target Pos	Freq	Mean CN	Type	Significant	q-val	Corr Coef
BARI_DM	BARI_DM	-	+	3.13677	1729.06	1	67.3529	Tandem	TRUE	0	1
BARI_DM	BARI_DM	-	+	1089.72	380.943	0.2	0.2	Deletion	TRUE	2.2337e-05	0.54443
BARI_DM	BARI_DM	-	+	737.528	1603.16	0.0352941	0.0352941	Tandem	TRUE	0.00145809	0.455659
BARI_DM	COPIA_LTR_DM	-	-	870.913	-35.6348	0.0352941	0.0352941	Junction	TRUE	0.00145809	0.455659
BARI_DM	COPIA_LTR_DM	+	+	808.592	308.764	0.0352941	0.0352941	Junction	TRUE	0.00145809	0.455659
BARI_DM	BARI_DM	-	+	1075.67	599.483	0.0470588	0.0470588	Deletion	TRUE	0.00422686	0.420565
BARI_DM	GTWIN_LTR	-	+	1426.57	390.278	0.0470588	0.0470588	Junction	TRUE	0.00422686	0.420565
BARI_DM	GTWIN_LTR	-	+	-96.0985	590.707	0.0470588	0.0470588	Junction	TRUE	0.00422686	0.420565
BARI_DM	GTWIN_LTR	+	-	1569.99	31.3515	0.0470588	0.0470588	Junction	TRUE	0.00422686	0.420565
BARI_DM	X	-	+	-23.5659	1.66651e+07	0.0117647	0.0117647	Junction	FALSE	0.909387	0.0408587
BARI_DM	X	-	+	4.84073	6.96166e+06	0.0941176	0.0941176	Junction	FALSE	0.868733	-0.125927
BARI_DM	X	-	+	62.1404	1.71932e+07	0.0117647	0.0117647	Junction	FALSE	0.899494	0.067574
BARI_DM	X	-	+	-5.99845	1.9646e+06	0.0117647	0.0117647	Junction	FALSE	0.899494	0.067574
BARI_DM	X	-	+	-38.2694	2.11228e+07	0.0235294	0.0235294	Junction	FALSE	0.231665	0.259573
BARI_DM	X	-	+	-42.0527	6.51007e+06	0.0117647	0.0117647	Junction	FALSE	0.508424	-0.188893
BARI_DM	X	-	+	-78.4125	5.378e+06	0.0117647	0.0117647	Junction	FALSE	0.065311	0.334727
BARI_DM	X	-	+	2.59356	1.32319e+07	0.0470588	0.0470588	Junction	FALSE	0.508424	-0.216044
BARI_DM	X	-	+	87.48	1.27243e+07	0.0117647	0.0117647	Junction	FALSE	0.899494	-0.0713455
BARI_DM	X	-	+	-101.823	6.2408e+06	0.0235294	0.0235294	Junction	FALSE	0.625699	-0.158516
BARI_DM	X	-	+	28.9755	6.24093e+06	0.0823529	0.0823529	Junction	FALSE	0.639848	-0.156069
BARI_DM	X	-	+	60.6085	1.80146e+07	0.0352941	0.0352941	Junction	FALSE	0.913749	0.0341606
BARI_DM	X	-	+	1.879	1.43217e+07	0.0117647	0.0117647	Junction	FALSE	0.899494	0.067574
BARI_DM	X	-	+	6.19417	4.26727e+06	0.0235294	0.0235294	Junction	FALSE	0.899494	-0.101504
BARI_DM	X	-	+	49.8606	1.36377e+07	0.0117647	0.0117647	Junction	FALSE	0.508424	-0.18355
BARI_DM	X	-	+	24.3721	1.66696e+07	0.0235294	0.0235294	Junction	FALSE	0.899494	-0.105305
BARI_DM	X	-	+	147.724	4.85337e+06	0.0117647	0.0117647	Junction	FALSE	0.920596	0.0301726
BARI_DM	X	-	+	-71.0677	4.85313e+06	0.0117647	0.0117647	Junction	FALSE	0.920596	0.0301726
BARI_DM	X	-	+	56.3208	1.38803e+07	0.0117647	0.0117647	Junction	FALSE	0.909387	-0.0553164
BARI_DM	X	-	+	-18.4419	2.25931e+07	0.0705882	0.0705882	Junction	FALSE	0.8751	-0.123974
BARI_DM	X	-	+	37.5504	1.10819e+07	0.0117647	0.0117647	Junction	FALSE	0.899494	-0.0660025
BARI_DM	X	-	+	-18.7665	2.24925e+07	0.0235294	0.0235294	Junction	FALSE	0.762284	-0.139512
BARI_DM	X	-	+	-54.8854	2.30548e+06	0.0352941	0.0352941	Junction	FALSE	0.300268	-0.246838
BARI_DM	X	-	+	-20.8401	1.52519e+07	0.0235294	0.0235294	Junction	FALSE	0.969349	-0.0102845
BARI_DM	X	-	+	13.2702	1.93616e+07	0.0117647	0.0117647	Junction	FALSE	0.508424	-0.18355
BARI_DM	X	-	+	120.53	9.0179e+06	0.0117647	0.0117647	Junction	FALSE	0.96019	-0.0125719
BARI_DM	X	-	-	12.3081	2.105e+07	0.0352941	0.0470588	Junction	FALSE	0.899494	-0.100054
BARI_DM	X	-	-	-31.171	1.71654e+07	0.0235294	0.0235294	Junction	FALSE	0.913749	0.0353251
BARI_DM	X	-	-	-12.8858	1.28934e+07	0.129412	0.129412	Junction	FALSE	0.528093	-0.171438
BARI_DM	X	-	-	-35.2771	3.65722e+06	0.0352941	0.0352941	Junction	FALSE	0.909387	-0.0470168
BARI_DM	X	-	-	67.946	1.86425e+07	0.0117647	0.0117647	Junction	FALSE	0.899494	-0.108747
BARI_DM	X	-	-	-5.02771	4.57364e+06	0.0117647	0.0117647	Junction	FALSE	0.899494	0.0889462
BARI_DM	X	-	-	-70.604	1.20958e+07	0.0117647	0.0117647	Junction	FALSE	0.899494	-0.108747
BARI_DM	X	-	-	32.3747	1.46624e+07	0.0117647	0.0117647	Junction	FALSE	0.922153	-0.0286011
BARI_DM	X	-	-	-19.7841	1.51816e+07	0.0117647	0.0117647	Junction	FALSE	0.899494	0.0782601
BARI_DM	X	-	-	-19.2012	2.14236e+07	0.0470588	0.0470588	Junction	FALSE	0.508424	-0.210603
BARI_DM	X	-	-	-14.4501	8.92831e+06	0.0235294	0.0235294	Junction	FALSE	0.909387	-0.0558942
BARI_DM	X	-	-	24.057	1.91253e+07	0.0117647	0.0117647	Junction	FALSE	0.508424	-0.18355
BARI_DM	X	-	-	52.6063	1.12214e+06	0.0117647	0.0117647	Junction	FALSE	0.940353	-0.023258
BARI_DM	X	-	-	1.97273	1.29798e+07	0.0117647	0.0117647	Junction	FALSE	0.969541	-0.00722884
BARI_DM	X	-	-	-4.28727	1.95906e+07	0.0117647	0.0117647	Junction	FALSE	0.899494	-0.103404
BARI_DM	X	-	-	35.5302	456811	0.0117647	0.0117647	Junction	FALSE	0.96019	-0.0125719
BARI_DM	X	-	-	-42.1507	4.30718e+06	0.0117647	0.0117647	Junction	FALSE	0.899494	-0.0980608
BARI_DM	X	-	-	-33.2644	856357	0.0117647	0.0117647	Junction	FALSE	0.508424	-0.18355
BARI_DM	X	-	-	-7.89358	7.16741e+06	0.0117647	0.0117647	Junction	FALSE	0.969541	-0.00722884
BARI_DM	X	-	-	26.7775	1.92275e+07	0.0117647	0.0117647	Junction	FALSE	0.52294	0.174435
BARI_DM	X	-	-	-43.4301	7.25539e+06	0.0117647	0.0117647	Junction	FALSE	0.909387	-0.0392872
BARI_DM	X	-	-	1501.12	5.98662e+06	0.0117647	0.0117647	Junction	FALSE	0.940353	-0.023258
BARI_DM	X	-	-	22.1147	8.47345e+06	0.0117647	0.0117647	Junction	FALSE	0.909387	-0.0392872
BARI_DM	X	-	-	-60.7878	1.51537e+07	0.0117647	0.0117647	Junction	FALSE	0.508424	0.185121
BARI_DM	X	+	-	1741.75	6.96166e+06	0.0941176	0.0941176	Junction	FALSE	0.868733	-0.125927
BARI_DM	X	+	-	1813.91	4.26734e+06	0.0235294	0.0235294	Junction	FALSE	0.899494	-0.101504
BARI_DM	X	+	-	1690.31	1.09744e+07	0.0117647	0.0117647	Junction	FALSE	0.525776	-0.172864
BARI_DM	X	+	-	1663.5	1.80145e+07	0.0235294	0.0235294	Junction	FALSE	0.909387	-0.040691
BARI_DM	X	+	-	1689.96	5.37803e+06	0.0117647	0.0117647	Junction	FALSE	0.065311	0.334727
BARI_DM	X	+	-	1694.65	4.85317e+06	0.0117647	0.0117647	Junction	FALSE	0.920596	0.0301726
BARI_DM	X	+	-	1735.14	1.32319e+07	0.0470588	0.0470588	Junction	FALSE	0.508424	-0.216044
BARI_DM	X	+	-	1742.82	2.25931e+07	0.0705882	0.0705882	Junction	FALSE	0.8751	-0.123974
BARI_DM	X	+	-	1742.34	2.11229e+07	0.0235294	0.0235294	Junction	FALSE	0.231665	0.259573
BARI_DM	X	+	-	1775.95	1.96464e+06	0.0117647	0.0117647	Junction	FALSE	0.899494	0.067574
BARI_DM	X	+	-	1772.14	9.01782e+06	0.0117647	0.0117647	Junction	FALSE	0.96019	-0.0125719
BARI_DM	X	+	-	1723.88	1.66696e+07	0.0235294	0.0235294	Junction	FALSE	0.899494	-0.105305
BARI_DM	X	+	-	1772.85	1.38803e+07	0.0117647	0.0117647	Junction	FALSE	0.909387	-0.0553164
BARI_DM	X	+	-	1671.81	1.93615e+07	0.0117647	0.0117647	Junction	FALSE	0.508424	-0.18355
BARI_DM	X	+	-	1709.44	1.27241e+07	0.0117647	0.0117647	Junction	FALSE	0.899494	-0.0713455
BARI_DM	X	+	-	1714.5	2.30551e+06	0.0352941	0.0352941	Junction	FALSE	0.300268	-0.246838
BARI_DM	X	+	-	1733.18	1.36377e+07	0.0117647	0.0117647	Junction	FALSE	0.508424	-0.18355
BARI_DM	X	+	-	1751.19	1.52519e+07	0.0235294	0.0235294	Junction	FALSE	0.969349	-0.0102845
BARI_DM	X	+	-	1682.9	6.51008e+06	0.0117647	0.0117647	Junction	FALSE	0.508424	-0.188893
BARI_DM	X	+	-	1770.42	1.43217e+07	0.0117647	0.0117647	Junction	FALSE	0.899494	0.067574
BARI_DM	X	+	-	1730.89	6.2409e+06	0.0941176	0.0941176	Junction	FALSE	0.508424	-0.214715
BARI_DM	X	+	-	1686.42	1.71931e+07	0.0117647	0.0117647	Junction	FALSE	0.899494	0.067574
BARI_DM	X	+	-	1743.56	1.10819e+07	0.0117647	0.0117647	Junction	FALSE	0.899494	-0.0660025
BARI_DM	X	+	-	1696.94	2.24925e+07	0.0235294	0.0235294	Junction	FALSE	0.762284	-0.139512
BARI_DM	X	+	+	1713.25	1.20957e+07	0.0117647	0.0117647	Junction	FALSE	0.899494	-0.108747
BARI_DM	X	+	+	1717.99	1.28934e+07	0.129412	0.129412	Junction	FALSE	0.528093	-0.171438
BARI_DM	X	+	+	1650.95	1.86427e+07	0.0117647	0.0117647	Junction	FALSE	0.899494	-0.108747
BARI_DM	X	+	+	1781.88	1.71653e+07	0.0235294	0.0235294	Junction	FALSE	0.913749	0.0353251
BARI_DM	X	+	+	1791.53	4.57358e+06	0.0117647	0.0117647	Junction	FALSE	0.899494	0.0889462
BARI_DM	X	+	+	1713.38	2.14236e+07	0.0470588	0.0588235	Junction	FALSE	0.428651	-0.231294
BARI_DM	X	+	+	1709.68	1.51537e+07	0.0117647	0.0117647	Junction	FALSE	0.508424	0.185121
BARI_DM	X	+	+	1761.79	1.92275e+07	0.0117647	0.0117647	Junction	FALSE	0.52294	0.174435
BARI_DM	X	+	+	1717.3	1.46625e+07	0.0117647	0.0117647	Junction	FALSE	0.922153	-0.0286011
BARI_DM	X	+	+	1739.01	856318	0.0117647	0.0117647	Junction	FALSE	0.508424	-0.18355
BARI_DM	X	+	+	1748.8	4.30713e+06	0.0117647	0.0117647	Junction	FALSE	0.899494	-0.0980608
BARI_DM	X	+	+	1779.73	1.12215e+06	0.0117647	0.0117647	Junction	FALSE	0.940353	-0.023258
BARI_DM	X	+	+	1740.12	1.51816e+07	0.0117647	0.0117647	Junction	FALSE	0.899494	0.0782601
BARI_DM	X	+	+	1769.43	1.91253e+07	0.0117647	0.0117647	Junction	FALSE	0.508424	-0.18355
BARI_DM	X	+	+	1733.98	3.6572e+06	0.0352941	0.0352941	Junction	FALSE	0.909387	-0.0470168
BARI_DM	X	+	+	1657.7	456926	0.0117647	0.0117647	Junction	FALSE	0.96019	-0.0125719
BARI_DM	X	+	+	1658.33	8.47355e+06	0.0117647	0.0117647	Junction	FALSE	0.909387	-0.0392872
BARI_DM	X	+	+	1718.45	1.95906e+07	0.0117647	0.0117647	Junction	FALSE	0.899494	-0.103404
BARI_DM	X	+	+	1706.04	2.105e+07	0.0352941	0.0352941	Junction	FALSE	0.899494	-0.118828
BARI_DM	X	+	+	1705.29	7.25537e+06	0.0117647	0.0117647	Junction	FALSE	0.909387	-0.0392872
BARI_DM	X	+	+	1700.68	7.16743e+06	0.0117647	0.0117647	Junction	FALSE	0.969541	-0.00722884
BARI_DM	X	+	+	1755.48	1.29798e+07	0.0117647	0.0117647	Junction	FALSE	0.969541	-0.00722884
BARI_DM	FB4_DM	+	-	1541.3	3089.58	0.0235294	0.0235294	Junction	FALSE	0.909387	-0.059695
BARI_DM	FB4_DM	+	-	1771.55	3466.4	0.0352941	0.0470588	Junction	FALSE	0.899494	-0.0670051
BARI_DM	FB4_DM	+	+	1736.63	664.143	0.0352941	0.0352941	Junction	FALSE	0.89963	-0.06575
BARI_DM	FB4_DM	+	+	1891.31	4261.81	0.0117647	0.0117647	Junction	FALSE	0.508424	-0.18355
BARI_DM	LOOPER1_DM	-	+	-1.56155	816.083	0.176471	0.211765	Junction	FALSE	0.899494	0.100065
BARI_DM	LOOPER1_DM	+	-	1729.88	814.373	0.176471	0.2	Junction	FALSE	0.909387	0.0557078
BARI_DM	2R	-	+	-33.0564	1.09179e+07	0.0352941	0.0352941	Junction	FALSE	0.909387	-0.0532612
BARI_DM	2R	-	+	17.9169	7.76583e+06	0.0235294	0.0235294	Junction	FALSE	0.762284	-0.139512
BARI_DM	2R	-	+	3.8151	167237	0.905882	0.905882	Junction	FALSE	0.899494	0.0746279
BARI_DM	2R	-	+	-22.9464	5.49698e+06	0.0470588	0.0470588	Junction	FALSE	0.909387	-0.0392079
BARI_DM	2R	-	+	-9.43633	6.03863e+06	0.0470588	0.0470588	Junction	FALSE	0.12464	-0.305822
BARI_DM	2R	-	+	-64.1256	9.86756e+06	0.0117647	0.0117647	Junction	FALSE	0.508424	-0.18355
BARI_DM	2R	-	+	109.163	7.00976e+06	0.0352941	0.0352941	Junction	FALSE	0.945756	-0.0189169
BARI_DM	2R	-	+	-32.1464	2.2135e+07	0.0117647	0.0117647	Junction	FALSE	0.508424	-0.18355
BARI_DM	2R	-	+	-13.9946	6.12469e+06	0.0352941	0.0352941	Junction	FALSE	0.899494	0.109094
BARI_DM	2R	-	+	106.485	1.55326e+07	0.0117647	0.0117647	Junction	FALSE	0.909387	-0.0553164
BARI_DM	2R	-	+	-124.197	4.75051e+06	0.0235294	0.0235294	Junction	FALSE	0.868733	0.126544
BARI_DM	2R	-	+	-43.4424	2.41326e+07	0.0117647	0.0117647	Junction	FALSE	0.899494	-0.0927178
BARI_DM	2R	-	+	-0.907497	1.03072e+07	0.0117647	0.0117647	Junction	FALSE	0.909387	0.0568878
BARI_DM	2R	-	+	-43.7251	6.02015e+06	0.0470588	0.0470588	Junction	FALSE	0.899494	-0.0745751
BARI_DM	2R	-	+	6.32498	1.50068e+07	0.0117647	0.0117647	Junction	FALSE	0.189861	0.27061
BARI_DM	2R	-	+	139.748	7.47965e+06	0.0117647	0.0117647	Junction	FALSE	0.899494	0.104975
BARI_DM	2R	-	+	-33.2326	1.44937e+07	0.0117647	0.0117647	Junction	FALSE	0.909387	-0.0392872
BARI_DM	2R	-	+	-42.5933	6.62216e+06	0.0117647	0.0117647	Junction	FALSE	0.295302	0.249238
BARI_DM	2R	-	+	16.53	7.75093e+06	0.0117647	0.0117647	Junction	FALSE	0.899494	-0.0713455
BARI_DM	2R	-	+	-111.239	1.61769e+07	0.0117647	0.0117647	Junction	FALSE	0.899494	-0.0873747
BARI_DM	2R	-	+	-22.3175	2.21376e+07	0.0117647	0.0117647	Junction	FALSE	0.899494	-0.0766886
BARI_DM	2R	-	+	-51.0833	1.2271e+07	0.0117647	0.0117647	Junction	FALSE	0.909387	-0.0499733
BARI_DM	2R	-	+	25.7349	4.24061e+06	0.0117647	0.0117647	Junction	FALSE	0.899494	-0.0820316
BARI_DM	2R	-	-	-33.0146	1.88601e+07	0.258824	0.258824	Junction	FALSE	0.969541	0.00951709
BARI_DM	2R	-	-	-27.4829	8.37744e+06	0.0470588	0.0470588	Junction	FALSE	0.909387	-0.0473696
BARI_DM	2R	-	-	49.2305	1.1222e+07	0.0117647	0.0117647	Junction	FALSE	0.899494	-0.0766886
BARI_DM	2R	-	-	-7.79171	1.33759e+07	0.0117647	0.0117647	Junction	FALSE	0.909387	0.0462017
BARI_DM	2R	-	-	10.2609	2.17824e+07	0.0117647	0.0117647	Junction	FALSE	0.899494	-0.0820316
BARI_DM	2R	-	-	-3.92096	4.24004e+06	0.0117647	0.0117647	Junction	FALSE	0.899494	-0.0820316
BARI_DM	2R	-	-	-10.0046	2.03825e+07	0.0352941	0.0352941	Junction	FALSE	0.922153	-0.0282835
BARI_DM	2R	-	-	-43.8131	1.44258e+07	0.0117647	0.0117647	Junction	FALSE	0.508424	-0.18355
BARI_DM	2R	+	-	1721.61	1.50067e+07	0.0117647	0.0117647	Junction	FALSE	0.189861	0.27061
BARI_DM	2R	+	-	1661.24	1.6177e+07	0.0117647	0.0117647	Junction	FALSE	0.899494	-0.0873747
BARI_DM	2R	+	-	1723.63	1.44937e+07	0.0117647	0.0117647	Junction	FALSE	0.909387	-0.0392872
BARI_DM	2R	+	-	1760.64	1.03072e+07	0.0235294	0.0235294	Junction	FALSE	0.93618	-0.0254877
BARI_DM	2R	+	-	1833.42	7.4796e+06	0.0117647	0.0117647	Junction	FALSE	0.899494	0.104975
BARI_DM	2R	+	-	1781.37	5.49705e+06	0.0352941	0.0352941	Junction	FALSE	0.97386	-0.00642808
BARI_DM	2R	+	-	1773.77	4.24063e+06	0.0117647	0.0117647	Junction	FALSE	0.899494	-0.0820316
BARI_DM	2R	+	-	1712.57	6.12468e+06	0.0235294	0.0235294	Junction	FALSE	0.909387	0.0505283
BARI_DM	2R	+	-	1820.39	6.02029e+06	0.0352941	0.0352941	Junction	FALSE	0.899494	-0.103217
BARI_DM	2R	+	-	1874.74	1.61773e+07	0.0117647	0.0117647	Junction	FALSE	0.899494	-0.0873747
BARI_DM	2R	+	-	1720.13	1.22711e+07	0.0117647	0.0117647	Junction	FALSE	0.909387	-0.0499733
BARI_DM	2R	+	-	1715.65	6.03861e+06	0.0470588	0.0470588	Junction	FALSE	0.12464	-0.305822
BARI_DM	2R	+	-	1724.71	7.75091e+06	0.0352941	0.0352941	Junction	FALSE	0.909387	-0.0470168
BARI_DM	2R	+	-	1723.58	7.00964e+06	0.0352941	0.0352941	Junction	FALSE	0.945756	-0.0189169
BARI_DM	2R	+	-	1761.39	2.21376e+07	0	0	Junction	FALSE	1	nan
BARI_DM	2R	+	-	1714.81	9.86761e+06	0.0117647	0.0117647	Junction	FALSE	0.508424	-0.18355
BARI_DM	2R	+	-	1611.43	4.75161e+06	0.0117647	0.0117647	Junction	FALSE	0.913749	0.0355156
BARI_DM	2R	+	-	1727.69	7.7658e+06	0.0235294	0.0235294	Junction	FALSE	0.762284	-0.139512
BARI_DM	2R	+	-	1726.61	2.2135e+07	0.0117647	0.0117647	Junction	FALSE	0.508424	-0.18355
BARI_DM	2R	+	-	1740.35	1.39805e+07	0.0117647	0.0117647	Junction	FALSE	0.508424	-0.18355
BARI_DM	2R	+	-	1739.37	1.09179e+07	0.0470588	0.0470588	Junction	FALSE	0.920596	-0.0310463
BARI_DM	2R	+	+	1733.9	1.33759e+07	0.0117647	0.0117647	Junction	FALSE	0.909387	0.0462017
BARI_DM	2R	+	+	1769.74	1.88583e+07	0.552941	0.552941	Junction	FALSE	0.913749	0.0363983
BARI_DM	2R	+	+	1687.93	1.11861e+07	0.0117647	0.0117647	Junction	FALSE	0.909387	0.0568878
BARI_DM	2R	+	+	1875.03	2.97029e+06	0.0823529	0.0823529	Junction	FALSE	0.023996	0.376243
BARI_DM	2R	+	+	1689.06	1.12221e+07	0.0117647	0.0117647	Junction	FALSE	0.899494	-0.0766886
BARI_DM	2R	+	+	1757.86	2.03825e+07	0.0352941	0.0352941	Junction	FALSE	0.922153	-0.0282835
BARI_DM	2R	+	+	1713.76	8.37746e+06	0.0470588	0.0470588	Junction	FALSE	0.909387	-0.0473696
BARI_DM	2R	+	+	1626.81	1.44259e+07	0.0117647	0.0117647	Junction	FALSE	0.508424	-0.18355
BARI_DM	I_DM	-	+	316.106	5387.74	0.0117647	0.0117647	Junction	FALSE	0.96019	0.0141434
BARI_DM	I_DM	-	+	449.732	5357.87	0.0117647	0.0117647	Junction	FALSE	0.909387	-0.0553164
BARI_DM	I_DM	-	+	33.5109	5391.49	0.0117647	0.0117647	Junction	FALSE	0.899494	-0.0873747
BARI_DM	I_DM	-	-	578.415	2743.44	0.0352941	0.0352941	Junction	FALSE	0.184308	0.28706
BARI_DM	I_DM	-	-	-9.36811	3.77633	0.0235294	0.0235294	Junction	FALSE	0.945756	0.0201219
BARI_DM	I_DM	+	-	1791.31	-131.883	0.0117647	0.0117647	Junction	FALSE	0.899494	-0.0766886
BARI_DM	I_DM	+	-	1812.74	54.2609	0.0117647	0.0117647	Junction	FALSE	0.899494	-0.0873747
BARI_DM	I_DM	+	-	738.733	2528.27	0.0235294	0.0235294	Junction	FALSE	0.463196	0.225365
BARI_DM	I_DM	+	-	361.872	32.5568	0.0117647	0.0117647	Junction	FALSE	0.96019	0.0141434
BARI_DM	I_DM	+	-	583.668	85.6175	0.0117647	0.0117647	Junction	FALSE	0.909387	-0.0553164
BARI_DM	2L	-	+	-114.597	2.07079e+07	0.0117647	0.0117647	Junction	FALSE	0.899494	-0.0660025
BARI_DM	2L	-	+	-49.1225	8.23048e+06	0.0117647	0.0117647	Junction	FALSE	0.52294	0.174435
BARI_DM	2L	-	+	16.8062	1.93714e+07	0.0235294	0.0235294	Junction	FALSE	0.899494	-0.0672966
BARI_DM	2L	-	+	-49.52	9.17525e+06	0.0117647	0.0117647	Junction	FALSE	0.899494	-0.0713455
BARI_DM	2L	-	+	-59.8736	1.37423e+07	0.0588235	0.0588235	Junction	FALSE	0.913749	0.0348551
BARI_DM	2L	-	+	-147.22	9.64074e+06	0.0117647	0.0117647	Junction	FALSE	0.96019	-0.0125719
BARI_DM	2L	-	+	43.7128	1.39521e+07	0.0117647	0.0117647	Junction	FALSE	0.508424	-0.188893
BARI_DM	2L	-	+	-45.2555	8.18806e+06	0.0117647	0.0117647	Junction	FALSE	0.96019	-0.0125719
BARI_DM	2L	-	+	97.7365	2.07081e+07	0.0117647	0.0117647	Junction	FALSE	0.899494	-0.0660025
BARI_DM	2L	-	+	111.209	7.59577e+06	0.0117647	0.0117647	Junction	FALSE	0.909387	0.0462017
BARI_DM	2L	-	+	103.845	9.17534e+06	0.0117647	0.0117647	Junction	FALSE	0.909387	-0.0499733
BARI_DM	2L	-	+	-112.52	1.34405e+07	0.0117647	0.0117647	Junction	FALSE	0.899494	-0.0713455
BARI_DM	2L	-	+	1.51947	1.22937e+07	0.0470588	0.0470588	Junction	FALSE	0.52894	-0.169794
BARI_DM	2L	-	+	50.1913	1.89377e+07	0.0235294	0.0235294	Junction	FALSE	0.899494	-0.0748982
BARI_DM	2L	-	+	32.8775	6.84081e+06	0.0117647	0.0117647	Junction	FALSE	0.52294	0.174435
BARI_DM	2L	-	+	119.897	1.34408e+07	0.0117647	0.0117647	Junction	FALSE	0.899494	-0.0713455
BARI_DM	2L	-	+	-43.9833	1.55711e+06	0.0117647	0.0117647	Junction	FALSE	0.909387	-0.0499733
BARI_DM	2L	-	+	-24.0856	6.86333e+06	0.0117647	0.0117647	Junction	FALSE	0.899494	0.110318
BARI_DM	2L	-	+	-9.49757	8.91621e+06	0.0117647	0.0117647	Junction	FALSE	0.899494	0.0782601
BARI_DM	2L	-	+	99.75	1.03532e+07	0.0117647	0.0117647	Junction	FALSE	0.909387	-0.0499733
BARI_DM	2L	-	+	-133.41	6.52441e+06	0.0117647	0.0117647	Junction	FALSE	0.993501	-0.00188578
BARI_DM	2L	-	+	87.2108	1.58216e+07	0.0117647	0.0117647	Junction	FALSE	0.52294	0.174435
BARI_DM	2L	-	+	-106.27	5.88813e+06	0.0117647	0.0117647	Junction	FALSE	0.899494	0.115661
BARI_DM	2L	-	-	21.2467	2.35501e+06	0.0235294	0.0235294	Junction	FALSE	0.93618	-0.0254877
BARI_DM	2L	-	-	24.73	1.35891e+07	0.0117647	0.0117647	Junction	FALSE	0.899494	-0.0713455
BARI_DM	2L	-	-	-148.695	2.43856e+06	0.0117647	0.0117647	Junction	FALSE	0.909387	0.0568878
BARI_DM	2L	-	-	14.2155	525294	0.0235294	0.0235294	Junction	FALSE	0.993501	0.00111788
BARI_DM	2L	-	-	-2.175	5.79034e+06	0.0235294	0.0235294	Junction	FALSE	0.899494	-0.112906
BARI_DM	2L	-	-	-1.99472	1.37635e+07	0.0235294	0.0235294	Junction	FALSE	0.899494	0.0733331
BARI_DM	2L	-	-	-71.5281	1.38876e+07	0.0352941	0.0352941	Junction	FALSE	0.960582	0.0123052
BARI_DM	2L	-	-	0.647435	5.27001e+06	0.0117647	0.0117647	Junction	FALSE	0.909387	-0.0499733
BARI_DM	2L	-	-	19.5284	1.36288e+07	0.0235294	0.0235294	Junction	FALSE	0.969541	0.00871949
BARI_DM	2L	-	-	-9.45159	1.71924e+07	0.0117647	0.0117647	Junction	FALSE	0.899494	-0.0873747
BARI_DM	2L	-	-	49.7609	8.44588e+06	0.0117647	0.0117647	Junction	FALSE	0.899494	-0.0873747
BARI_DM	2L	-	-	-108.748	9.23775e+06	0.0117647	0.0117647	Junction	FALSE	0.899494	0.067574
BARI_DM	2L	-	-	-77.3488	1.92306e+07	0.0117647	0.0117647	Junction	FALSE	0.969541	-0.00722884
BARI_DM	2L	-	-	22.3565	1.62512e+07	0.0235294	0.0235294	Junction	FALSE	0.909387	-0.0520934
BARI_DM	2L	-	-	130.501	1.75915e+07	0.0117647	0.0117647	Junction	FALSE	0.909387	-0.0392872
BARI_DM	2L	-	-	12.851	8.58333e+06	0.0235294	0.0235294	Junction	FALSE	0.945756	-0.0216869
BARI_DM	2L	-	-	17.9167	1.47886e+07	0.0117647	0.0117647	Junction	FALSE	0.909387	-0.0499733
BARI_DM	2L	+	-	1645.12	1.58214e+07	0.0117647	0.0117647	Junction	FALSE	0.52294	0.174435
BARI_DM	2L	+	-	1761.55	9.17529e+06	0.0235294	0.0235294	Junction	FALSE	0.899494	-0.0863006
BARI_DM	2L	+	-	1741.73	1.22937e+07	0.0470588	0.0470588	Junction	FALSE	0.52894	-0.169794
BARI_DM	2L	+	-	1836.4	2.12605e+07	0.0117647	0.0117647	Junction	FALSE	0.508424	0.211836
BARI_DM	2L	+	-	1726.88	1.03531e+07	0.0352941	0.0470588	Junction	FALSE	0.909387	-0.0449724
BARI_DM	2L	+	-	1771.62	1.39521e+07	0.0117647	0.0117647	Junction	FALSE	0.508424	-0.188893
BARI_DM	2L	+	-	1723.79	7.59565e+06	0.0117647	0.0117647	Junction	FALSE	0.909387	0.0462017
BARI_DM	2L	+	-	1742.74	1.93721e+07	0.0235294	0.0235294	Junction	FALSE	0.899494	-0.0672966
BARI_DM	2L	+	-	1743.27	1.34407e+07	0.0117647	0.0117647	Junction	FALSE	0.899494	-0.0713455
BARI_DM	2L	+	-	1773.91	1.81495e+07	0.0117647	0.0117647	Junction	FALSE	0.508424	-0.18355
BARI_DM	2L	+	-	1595.7	6.8632e+06	0.0117647	0.0117647	Junction	FALSE	0.899494	0.110318
BARI_DM	2L	+	-	1742.19	1.37424e+07	0.0588235	0.0588235	Junction	FALSE	0.913749	0.0348551
BARI_DM	2L	+	-	1820.67	8.1882e+06	0.0117647	0.0117647	Junction	FALSE	0.96019	-0.0125719
BARI_DM	2L	+	-	1659.46	8.23044e+06	0.0117647	0.0117647	Junction	FALSE	0.52294	0.174435
BARI_DM	2L	+	-	1703.18	2.07079e+07	0.0117647	0.0117647	Junction	FALSE	0.899494	-0.0660025
BARI_DM	2L	+	-	1712.78	4.89367e+06	0.0117647	0.0235294	Junction	FALSE	0.899494	0.0889462
BARI_DM	2L	+	-	1753.76	6.8408e+06	0.0117647	0.0117647	Junction	FALSE	0.52294	0.174435
BARI_DM	2L	+	-	1730.29	9.64089e+06	0.0235294	0.0352941	Junction	FALSE	0.909387	-0.0409574
BARI_DM	2L	+	-	1660.44	5.88816e+06	0.0117647	0.0117647	Junction	FALSE	0.899494	0.115661
BARI_DM	2L	+	-	1750.69	1.89377e+07	0.0235294	0.0235294	Junction	FALSE	0.899494	-0.0748982
BARI_DM	2L	+	-	1739.87	1.55713e+06	0.0117647	0.0117647	Junction	FALSE	0.909387	-0.0499733
BARI_DM	2L	+	-	1700.25	8.91621e+06	0.0117647	0.0117647	Junction	FALSE	0.899494	0.0782601
BARI_DM	2L	+	+	1738.75	1.62512e+07	0.0235294	0.0352941	Junction	FALSE	0.909387	-0.0625659
BARI_DM	2L	+	+	1707.48	1.38875e+07	0.0235294	0.0235294	Junction	FALSE	0.915841	-0.0330893
BARI_DM	2L	+	+	1679.38	1.35973e+07	0.0117647	0.0117647	Junction	FALSE	0.909387	0.0462017
BARI_DM	2L	+	+	1807.02	1.36287e+07	0.0117647	0.0117647	Junction	FALSE	0.909387	-0.0553164
BARI_DM	2L	+	+	1759.83	1.75916e+07	0.0117647	0.0117647	Junction	FALSE	0.909387	-0.0392872
BARI_DM	2L	+	+	1776.84	525258	0.0235294	0.0235294	Junction	FALSE	0.993501	0.00111788
BARI_DM	2L	+	+	1737.42	9.23763e+06	0.0117647	0.0117647	Junction	FALSE	0.899494	0.067574
BARI_DM	2L	+	+	1704.19	5.79038e+06	0.0235294	0.0235294	Junction	FALSE	0.899494	-0.112906
BARI_DM	2L	+	+	1718.3	1.47887e+07	0.0117647	0.0117647	Junction	FALSE	0.909387	-0.0499733
BARI_DM	2L	+	+	1724.02	1.92306e+07	0.0117647	0.0117647	Junction	FALSE	0.969541	-0.00722884
BARI_DM	2L	+	+	1735.38	8.58334e+06	0.0235294	0.0235294	Junction	FALSE	0.945756	-0.0216869
BARI_DM	2L	+	+	1754.43	1.37635e+07	0.0117647	0.0117647	Junction	FALSE	0.899494	0.067574
BARI_DM	2L	+	+	251.862	2.43833e+06	0.0117647	0.0117647	Junction	FALSE	0.909387	0.0568878
BARI_DM	2L	+	+	1730.4	5.27e+06	0.0117647	0.0117647	Junction	FALSE	0.909387	-0.0499733
BARI_DM	2L	+	+	1661.58	2.3551e+06	0.0235294	0.0235294	Junction	FALSE	0.93618	-0.0254877
BARI_DM	2L	+	+	1618.27	1.35892e+07	0.0117647	0.0117647	Junction	FALSE	0.899494	-0.0713455
BARI_DM	STALKER4_I	-	+	1356.39	6579.55	0.811765	0.811765	Junction	FALSE	0.899494	0.0716971
BARI_DM	STALKER4_I	+	-	1725.39	6108.09	0.823529	0.870588	Junction	FALSE	0.519103	0.18113
BARI_DM	STALKER4_I	+	-	1759.46	6042.21	0.0117647	0.0117647	Junction	FALSE	0.909387	0.0462017
BARI_DM	STALKER4_LTR	-	+	-142.34	268.704	0.4	0.4	Junction	FALSE	0.766823	-0.138767
BARI_DM	STALKER4_LTR	+	-	1834.91	-117.984	0.0470588	0.0470588	Junction	FALSE	0.913749	-0.0337668
BARI_DM	BARI_DM	-	+	1344.65	1769.98	0.0235294	0.0235294	Tandem	FALSE	0.96019	-0.0140853
BARI_DM	BARI_DM	-	+	-71.0676	1811.47	0.352941	0.376471	Tandem	FALSE	0.93618	0.0257274
BARI_DM	BARI_DM	-	+	318.211	1157.12	0.0470588	0.0470588	Tandem	FALSE	0.909387	-0.0392079
BARI_DM	BARI_DM	-	+	637.99	1043.01	0.0117647	0.0117647	Tandem	FALSE	0.909387	0.0408587
BARI_DM	BARI_DM	-	+	-72.0055	1317.02	0.0588235	0.0588235	Tandem	FALSE	0.52894	-0.170819
BARI_DM	BARI_DM	-	+	740.188	1725.81	0.235294	0.247059	Tandem	FALSE	0.639848	0.156799
BARI_DM	BARI_DM	-	+	830.183	318.117	0.0117647	0.0117647	Deletion	FALSE	0.899494	0.0782601
BARI_DM	BARI_DM	-	+	-138.162	1844.25	0.0588235	0.0705882	Tandem	FALSE	0.508424	0.217827
BARI_DM	BARI_DM	-	+	1364.29	856.304	0.164706	0.176471	Deletion	FALSE	0.52894	-0.170055
BARI_DM	BARI_DM	-	+	92.2618	1488.22	0.670588	0.788235	Tandem	FALSE	0.0383666	0.361301
BARI_DM	BARI_DM	-	+	1397.03	1060.41	0.0235294	0.0235294	Deletion	FALSE	0.899494	-0.112906
BARI_DM	BARI_DM	-	+	630.964	271.437	0.270588	0.270588	Deletion	FALSE	0.519103	-0.181703
BARI_DM	BARI_DM	-	+	-140.245	1069.06	0.0941176	0.0941176	Tandem	FALSE	0.52968	-0.169335
BARI_DM	BARI_DM	-	+	1333.27	482.734	0.0117647	0.0117647	Deletion	FALSE	0.508424	0.211836
BARI_DM	BARI_DM	-	+	678.783	411.974	0.470588	0.529412	Deletion	FALSE	0.889204	-0.122538
BARI_DM	BARI_DM	-	+	389.363	1763.73	0.305882	0.305882	Tandem	FALSE	0.184308	-0.287791
BARI_DM	BARI_DM	-	+	-51.9748	379.775	0.0235294	0.0235294	Tandem	FALSE	0.519103	-0.181321
BARI_DM	BARI_DM	-	+	341.435	1469.48	0.0235294	0.0235294	Tandem	FALSE	0.0979137	0.316585
BARI_DM	BARI_DM	-	+	147.527	671.618	0.0235294	0.0352941	Tandem	FALSE	0.909387	-0.0601649
BARI_DM	BARI_DM	-	+	595.605	1806.12	0.0117647	0.0117647	Tandem	FALSE	0.899494	0.0782601
BARI_DM	BARI_DM	-	+	1072.7	843.299	0.0117647	0.0235294	Deletion	FALSE	0.173061	0.291982
BARI_DM	BARI_DM	-	+	61.0634	857.67	0.0117647	0.0117647	Tandem	FALSE	0.899494	0.115661
BARI_DM	BARI_DM	-	+	869.184	1748.02	0.0117647	0.0117647	Tandem	FALSE	0.899494	-0.0660025
BARI_DM	BARI_DM	-	+	-10.1064	1102.03	0.0235294	0.0235294	Tandem	FALSE	0.954499	0.0163211
BARI_DM	BARI_DM	-	+	854.044	426.186	0.0117647	0.0117647	Deletion	FALSE	0.940353	-0.023258
BARI_DM	BARI_DM	-	+	1042.94	878.035	0.152941	0.164706	Deletion	FALSE	0.920596	0.0316618
BARI_DM	BARI_DM	-	+	1336.8	589.454	0.0117647	0.0117647	Deletion	FALSE	0.909387	-0.0392872
BARI_DM	BARI_DM	-	+	1297.27	1128.84	0.105882	0.105882	Deletion	FALSE	0.909387	-0.052758
BARI_DM	BARI_DM	-	+	-100.038	1442.04	0.0117647	0.0117647	Tandem	FALSE	0.899494	-0.0927178
BARI_DM	BARI_DM	-	+	156.754	1056.53	0.0117647	0.0117647	Tandem	FALSE	0.189861	0.27061
BARI_DM	BARI_DM	-	+	420.582	1321.45	0.0235294	0.0235294	Tandem	FALSE	0.463196	0.225365
BARI_DM	BARI_DM	+	+	965.978	581.728	0.0235294	0.0235294	Inversion	FALSE	0.0979137	0.316585
BARI_DM	BARI_DM	+	+	1089.5	739	0.0117647	0.0117647	Inversion	FALSE	0.909387	0.0568878
BARI_DM	ZAM_I	-	-	-55.1725	4393.83	0.0235294	0.0352941	Junction	FALSE	0.508424	-0.185014
BARI_DM	ZAM_I	-	-	31.1031	4284.9	0.0235294	0.0235294	Junction	FALSE	0.597275	-0.162317
BARI_DM	ZAM_I	+	+	1748.69	4340.41	0.0352941	0.0352941	Junction	FALSE	0.528093	-0.171905
BARI_DM	P-element	+	+	1862.46	3025.83	0.0235294	0.0235294	Junction	FALSE	0.909387	-0.0520934
BARI_DM	COPIA_I_DM	-	-	238.343	-144.707	0.0705882	0.0705882	Junction	FALSE	0.945756	-0.0182587
BARI_DM	COPIA_I_DM	-	-	699.325	-146.475	0.0117647	0.0117647	Junction	FALSE	0.189861	0.27061
BARI_DM	COPIA_I_DM	+	+	1008.17	4710.5	0.0235294	0.0235294	Junction	FALSE	0.0979137	0.316585
BARI_DM	COPIA_I_DM	+	+	515.821	4720.7	0.0352941	0.0352941	Junction	FALSE	0.899494	-0.109461
BARI_DM	3R	-	+	-1.42862	1.91371e+07	0.917647	1.43529	Junction	FALSE	0.899494	0.117929
BARI_DM	3R	-	+	16.8029	1.44391e+07	0.0117647	0.0117647	Junction	FALSE	0.899494	0.0889462
BARI_DM	3R	-	+	-18.2262	2.50861e+07	0.0705882	0.0823529	Junction	FALSE	0.909387	-0.0539339
BARI_DM	3R	-	+	446.213	1.91372e+07	0.0235294	0.0235294	Junction	FALSE	0.52294	0.179756
BARI_DM	3R	-	+	-13.9834	1.58345e+07	0.0117647	0.0117647	Junction	FALSE	0.993501	-0.00188578
BARI_DM	3R	-	+	-8.85871	1.0779e+07	0.0823529	0.176471	Junction	FALSE	0.792806	0.134515
BARI_DM	3R	-	+	34.1573	2.08485e+07	0.0235294	0.0470588	Junction	FALSE	0.748358	-0.143313
BARI_DM	3R	-	+	14.2647	2.66257e+07	0.0352941	0.0588235	Junction	FALSE	0.963197	0.0117453
BARI_DM	3R	-	+	-24.1144	1.02842e+07	0.0352941	0.0352941	Junction	FALSE	0.909387	-0.0438946
BARI_DM	3R	-	+	-21.0445	2.15214e+07	0.0235294	0.0235294	Junction	FALSE	0.762284	-0.139512
BARI_DM	3R	-	+	14.2049	1.36673e+07	0.0117647	0.0117647	Junction	FALSE	0.899494	-0.0980608
BARI_DM	3R	-	+	161.133	1.91371e+07	0.0117647	0.0235294	Junction	FALSE	0.899494	0.0782601
BARI_DM	3R	-	+	31.1523	1.37255e+07	0.0117647	0.0117647	Junction	FALSE	0.508424	-0.18355
BARI_DM	3R	-	+	49.3577	1.4936e+07	0.0117647	0.0117647	Junction	FALSE	0.913749	0.0355156
BARI_DM	3R	-	+	-15.7304	1.12621e+07	0.0117647	0.0117647	Junction	FALSE	0.899494	0.0889462
BARI_DM	3R	-	+	-47.075	2.0513e+07	0.0117647	0.0117647	Junction	FALSE	0.189861	0.27061
BARI_DM	3R	-	+	31.1328	4.83081e+06	0.0352941	0.0352941	Junction	FALSE	0.899494	0.084116
BARI_DM	3R	-	+	-52.5347	8.97593e+06	0.0117647	0.0117647	Junction	FALSE	0.899494	-0.0713455
BARI_DM	3R	-	+	-6.63671	1.36307e+07	0.0117647	0.0117647	Junction	FALSE	0.920596	0.0301726
BARI_DM	3R	-	+	-13.0968	1.17146e+07	0.0117647	0.0117647	Junction	FALSE	0.899494	-0.0660025
BARI_DM	3R	-	-	-6.68729	2.0537e+07	0.0117647	0.0117647	Junction	FALSE	0.909387	-0.0392872
BARI_DM	3R	-	-	271.997	2.91378e+07	0.0588235	0.0588235	Junction	FALSE	0.899494	-0.0998122
BARI_DM	3R	-	-	4.53794	4.55435e+06	0.270588	0.270588	Junction	FALSE	0.992119	0.00373781
BARI_DM	3R	-	-	-76.954	4.7611e+06	0.0117647	0.0117647	Junction	FALSE	0.899494	-0.108747
BARI_DM	3R	-	-	3.55692	2.19097e+07	0.0941176	0.0941176	Junction	FALSE	0.211777	0.264737
BARI_DM	3R	-	-	13.2574	2.71176e+07	0.0235294	0.0235294	Junction	FALSE	0.508424	-0.192723
BARI_DM	3R	-	-	-11.0646	9.1529e+06	0.0117647	0.0117647	Junction	FALSE	0.909387	-0.0446302
BARI_DM	3R	-	-	-21.4684	1.74864e+07	0.0117647	0.0117647	Junction	FALSE	0.909387	0.0462017
BARI_DM	3R	-	-	158.213	1.72317e+07	0.0117647	0.0117647	Junction	FALSE	0.909387	-0.0392872
BARI_DM	3R	-	-	-98.8539	6.70345e+06	0.0117647	0.0117647	Junction	FALSE	0.508424	-0.188893
BARI_DM	3R	-	-	35.6326	2.7207e+07	0.0117647	0.0117647	Junction	FALSE	0.899494	0.0782601
BARI_DM	3R	-	-	-73.9505	1.05226e+07	0.0117647	0.0117647	Junction	FALSE	0.899494	-0.0766886
BARI_DM	3R	-	-	-31.0094	2.35125e+07	0.0117647	0.0117647	Junction	FALSE	0.508424	-0.188893
BARI_DM	3R	-	-	21.932	2.36771e+07	0.0235294	0.0235294	Junction	FALSE	0.8751	-0.124309
BARI_DM	3R	-	-	-2.56064	4.39294e+06	0.0117647	0.0117647	Junction	FALSE	0.508424	0.206493
BARI_DM	3R	-	-	-95.6911	2.73261e+07	0.0235294	0.0235294	Junction	FALSE	0.899494	-0.116707
BARI_DM	3R	-	-	-154.728	2.9138e+07	0.0117647	0.0117647	Junction	FALSE	0.899494	0.067574
BARI_DM	3R	-	-	4.41766	9.38581e+06	0.0117647	0.0117647	Junction	FALSE	0.508424	-0.18355
BARI_DM	3R	-	-	11.8886	1.99584e+07	0.0117647	0.0117647	Junction	FALSE	0.909387	-0.0446302
BARI_DM	3R	-	-	118.573	2.55543e+06	0.0117647	0.0117647	Junction	FALSE	0.945756	-0.017915
BARI_DM	3R	-	-	-39.0003	1.28669e+07	0.0117647	0.0117647	Junction	FALSE	0.508424	0.211836
BARI_DM	3R	+	-	1711.78	1.0779e+07	0.0705882	0.0705882	Junction	FALSE	0.96735	0.0109817
BARI_DM	3R	+	-	1590.43	1.49359e+07	0.0117647	0.0117647	Junction	FALSE	0.913749	0.0355156
BARI_DM	3R	+	-	1720.8	1.91389e+07	0.917647	1.02353	Junction	FALSE	0.899494	0.0881606
BARI_DM	3R	+	-	1751.27	2.48263e+07	0.0705882	0.0705882	Junction	FALSE	0.909387	0.0582162
BARI_DM	3R	+	-	1779.68	1.36673e+07	0.0117647	0.0117647	Junction	FALSE	0.899494	-0.0980608
BARI_DM	3R	+	-	1789.45	1.17146e+07	0.0117647	0.0117647	Junction	FALSE	0.899494	-0.0660025
BARI_DM	3R	+	-	1894.59	1.49362e+07	0.0117647	0.0117647	Junction	FALSE	0.913749	0.0355156
BARI_DM	3R	+	-	1716.45	9.18065e+06	0.0117647	0.0117647	Junction	FALSE	0.909387	-0.0553164
BARI_DM	3R	+	-	1713.05	1.36307e+07	0.0117647	0.0117647	Junction	FALSE	0.920596	0.0301726
BARI_DM	3R	+	-	1766.88	1.58345e+07	0.0117647	0.0117647	Junction	FALSE	0.993501	-0.00188578
BARI_DM	3R	+	-	1717.77	8.97597e+06	0.0117647	0.0117647	Junction	FALSE	0.899494	-0.0713455
BARI_DM	3R	+	-	1750.69	4.83079e+06	0.0352941	0.0352941	Junction	FALSE	0.899494	0.084116
BARI_DM	3R	+	-	1773.66	2.50862e+07	0.0705882	0.0705882	Junction	FALSE	0.899494	-0.0812381
BARI_DM	3R	+	-	1818.37	2.15215e+07	0.0235294	0.0235294	Junction	FALSE	0.762284	-0.139512
BARI_DM	3R	+	-	1714.82	2.66257e+07	0.0352941	0.0352941	Junction	FALSE	0.96019	-0.0126725
BARI_DM	3R	+	-	1682.55	2.05157e+07	0.0117647	0.0117647	Junction	FALSE	0.189861	0.27061
BARI_DM	3R	+	-	1688.15	1.1262e+07	0.0117647	0.0117647	Junction	FALSE	0.899494	0.0889462
BARI_DM	3R	+	-	1762.51	1.37256e+07	0.0117647	0.0117647	Junction	FALSE	0.508424	-0.18355
BARI_DM	3R	+	-	1762.97	2.08485e+07	0.0235294	0.0235294	Junction	FALSE	0.748358	-0.143313
BARI_DM	3R	+	-	1683.99	1.02841e+07	0.0117647	0.0117647	Junction	FALSE	0.899494	-0.0766886
BARI_DM	3R	+	-	1821.45	2.30857e+07	0.0117647	0.0117647	Junction	FALSE	0.909387	-0.0553164
BARI_DM	3R	+	-	1804.58	1.89224e+07	0.0117647	0.0117647	Junction	FALSE	0.993501	-0.00188578
BARI_DM	3R	+	-	1725.9	1.44391e+07	0.0117647	0.0117647	Junction	FALSE	0.899494	0.0889462
BARI_DM	3R	+	+	1752.37	2.91378e+07	0.0470588	0.0470588	Junction	FALSE	0.899494	-0.0881779
BARI_DM	3R	+	+	1726.73	2.19097e+07	0.0823529	0.0823529	Junction	FALSE	0.697052	0.149906
BARI_DM	3R	+	+	1729.71	1.74864e+07	0.0117647	0.0117647	Junction	FALSE	0.909387	0.0462017
BARI_DM	3R	+	+	1739.69	4.55435e+06	0.247059	0.282353	Junction	FALSE	0.909387	-0.0628955
BARI_DM	3R	+	+	1747.99	2.36771e+07	0.0470588	0.0470588	Junction	FALSE	0.625644	-0.158912
BARI_DM	3R	+	+	1779.95	6.70332e+06	0.0117647	0.0117647	Junction	FALSE	0.508424	-0.188893
BARI_DM	3R	+	+	1767.84	2.71175e+07	0.0235294	0.0235294	Junction	FALSE	0.508424	-0.192723
BARI_DM	3R	+	+	1664.23	1.2867e+07	0.0117647	0.0117647	Junction	FALSE	0.508424	0.211836
BARI_DM	3R	+	+	1811.25	1.05225e+07	0.0117647	0.0117647	Junction	FALSE	0.899494	-0.0766886
BARI_DM	3R	+	+	1756.5	1.99583e+07	0.0117647	0.0117647	Junction	FALSE	0.909387	-0.0446302
BARI_DM	3R	+	+	1670.9	2.73261e+07	0.0235294	0.0235294	Junction	FALSE	0.508424	-0.207926
BARI_DM	3R	+	+	1779.95	2.35124e+07	0.0117647	0.0117647	Junction	FALSE	0.508424	-0.188893
BARI_DM	3R	+	+	1799.82	2.55549e+06	0.0352941	0.0352941	Junction	FALSE	0.639848	-0.156294
BARI_DM	3R	+	+	1798.45	2.77978e+07	0.0117647	0.0117647	Junction	FALSE	0.899494	-0.0873747
BARI_DM	3R	+	+	1772.57	2.05369e+07	0.0117647	0.0117647	Junction	FALSE	0.909387	-0.0392872
BARI_DM	3R	+	+	1706.12	2.72071e+07	0.0117647	0.0117647	Junction	FALSE	0.899494	0.0782601
BARI_DM	3R	+	+	1748.18	1.72318e+07	0.0117647	0.0117647	Junction	FALSE	0.909387	-0.0392872
BARI_DM	3R	+	+	1703.66	2.32443e+07	0.0117647	0.0117647	Junction	FALSE	0.065311	0.334727
BARI_DM	3R	+	+	1693.81	9.38586e+06	0.0117647	0.0117647	Junction	FALSE	0.508424	-0.18355
BARI_DM	3R	+	+	1755.79	9.15287e+06	0.0117647	0.0117647	Junction	FALSE	0.909387	-0.0446302
BARI_DM	3R	+	+	1887.2	1.28666e+07	0.0117647	0.0117647	Junction	FALSE	0.508424	0.211836
BARI_DM	3R	+	+	1788.83	2.36825e+07	0.0117647	0.0117647	Junction	FALSE	0.993501	-0.00188578
BARI_DM	BS	-	+	-2.52045	552.216	0.0235294	0.0235294	Junction	FALSE	0.767725	0.137947
BARI_DM	BS	+	-	1763.01	587.991	0.0235294	0.0235294	Junction	FALSE	0.767725	0.137947
BARI_DM	PROTOP	-	-	199.153	537.903	0.0117647	0.0117647	Junction	FALSE	0.899494	-0.0660025
BARI_DM	PROTOP	-	-	-1.76352	1489.57	0.0117647	0.0117647	Junction	FALSE	0.899494	-0.0660025
BARI_DM	PROTOP	-	-	29.4243	2859.7	0.0352941	0.0588235	Junction	FALSE	0.748358	-0.14359
BARI_DM	PROTOP	+	-	1721.81	-15.8606	0.0235294	0.0235294	Junction	FALSE	0.52294	0.175955
BARI_DM	PROTOP	+	+	1720.22	711.159	0.0117647	0.0117647	Junction	FALSE	0.899494	-0.0660025
BARI_DM	PROTOP	+	+	1728.96	2896.75	0.0235294	0.0352941	Junction	FALSE	0.52294	-0.17541
BARI_DM	ROO_LTR	-	+	986.665	449.585	0.0117647	0.0117647	Junction	FALSE	0.899494	-0.103404
BARI_DM	ROO_LTR	-	+	394.777	432.889	0.0117647	0.0117647	Junction	FALSE	0.909387	-0.0446302
BARI_DM	ROO_LTR	-	+	1093.48	417.889	0.0235294	0.0235294	Junction	FALSE	0.899494	-0.0939022
BARI_DM	ROO_LTR	-	+	594.463	454.823	0.0117647	0.0117647	Junction	FALSE	0.508424	0.206493
BARI_DM	ROO_LTR	-	-	1400.95	87.8681	0.0470588	0.0470588	Junction	FALSE	0.899494	-0.0854573
BARI_DM	ROO_LTR	-	-	-148.118	-97.7849	0.0117647	0.0117647	Junction	FALSE	0.899494	-0.0873747
BARI_DM	ROO_LTR	-	-	1145.5	-21.3945	0.0117647	0.0117647	Junction	FALSE	0.909387	0.0568878
BARI_DM	ROO_LTR	+	-	1093.54	27.7933	0.0352941	0.0352941	Junction	FALSE	0.767905	-0.137561
BARI_DM	ROO_LTR	+	-	1834.21	-119.213	0.0117647	0.0117647	Junction	FALSE	0.508424	-0.18355
BARI_DM	ROO_LTR	+	-	596.061	22.2727	0.0117647	0.0117647	Junction	FALSE	0.508424	0.206493
BARI_DM	ROO_LTR	+	-	432.023	26.6442	0.0117647	0.0117647	Junction	FALSE	0.909387	-0.0446302
BARI_DM	ROO_LTR	+	+	1547.06	388.916	0.0470588	0.0470588	Junction	FALSE	0.899494	-0.0854573
BARI_DM	ROO_LTR	+	+	257.653	497.653	0.0117647	0.0117647	Junction	FALSE	0.508424	-0.188893
BARI_DM	ROO_LTR	+	+	1159.4	403.15	0.0117647	0.0117647	Junction	FALSE	0.909387	0.0568878
BARI_DM	3L	-	+	-52.7555	2.04719e+07	0.0117647	0.0117647	Junction	FALSE	0.96019	-0.0125719
BARI_DM	3L	-	+	-9.92502	1.69306e+06	0.0117647	0.0117647	Junction	FALSE	0.189861	0.27061
BARI_DM	3L	-	+	-27.8326	1.07363e+07	0.0117647	0.0117647	Junction	FALSE	0.909387	-0.0392872
BARI_DM	3L	-	+	-75.7357	1.7108e+07	0.0352941	0.0352941	Junction	FALSE	0.899494	0.0809938
BARI_DM	3L	-	+	-21.3147	2.17638e+07	0.0705882	0.0705882	Junction	FALSE	0.899494	-0.0699918
BARI_DM	3L	-	+	-31.5071	1.22624e+07	0.0117647	0.0117647	Junction	FALSE	0.899494	-0.0873747
BARI_DM	3L	-	+	11.8245	1.32352e+07	0.0352941	0.0352941	Junction	FALSE	0.913749	-0.0376502
BARI_DM	3L	-	+	48.4574	2.58424e+06	0.0235294	0.0235294	Junction	FALSE	0.945756	-0.0178861
BARI_DM	3L	-	+	9.00744	1.8181e+07	0.0823529	0.0823529	Junction	FALSE	0.899494	-0.103676
BARI_DM	3L	-	+	-135.694	7.88435e+06	0.0117647	0.0117647	Junction	FALSE	0.899494	-0.0820316
BARI_DM	3L	-	+	-45.8954	1.9316e+07	0.0235294	0.0235294	Junction	FALSE	0.913749	-0.0368902
BARI_DM	3L	-	+	-53.7575	1.83867e+07	0.0470588	0.0470588	Junction	FALSE	0.913749	-0.0337668
BARI_DM	3L	-	+	-58.0606	1.74836e+07	0.0117647	0.0117647	Junction	FALSE	0.508424	0.206493
BARI_DM	3L	-	+	56.5042	1.32351e+07	0.0117647	0.0117647	Junction	FALSE	0.065311	0.334727
BARI_DM	3L	-	+	82.9703	7.88458e+06	0.0352941	0.0352941	Junction	FALSE	0.945756	-0.0189169
BARI_DM	3L	-	+	-22.4321	1.90405e+07	0.0235294	0.0235294	Junction	FALSE	0.899494	-0.105305
BARI_DM	3L	-	+	-28.5377	1.72219e+07	0.0117647	0.0117647	Junction	FALSE	0.899494	-0.0927178
BARI_DM	3L	-	+	-32.8527	1.76201e+07	0.0117647	0.0117647	Junction	FALSE	0.508424	-0.188893
BARI_DM	3L	-	+	31.0109	2.42921e+07	0.0117647	0.0117647	Junction	FALSE	0.909387	-0.0446302
BARI_DM	3L	-	+	-59.175	1.8738e+07	0.0117647	0.0117647	Junction	FALSE	0.189861	0.27061
BARI_DM	3L	-	+	-76.954	1.82162e+07	0.0117647	0.0117647	Junction	FALSE	0.909387	-0.0392872
BARI_DM	3L	-	+	-9.45399	3.80567e+06	0.0117647	0.0117647	Junction	FALSE	0.899494	-0.0660025
BARI_DM	3L	-	+	-39.9818	1.33547e+06	0.0117647	0.0117647	Junction	FALSE	0.969541	-0.00722884
BARI_DM	3L	-	+	88.4026	1.82285e+07	0.0117647	0.0117647	Junction	FALSE	0.899494	-0.0766886
BARI_DM	3L	-	+	-20.3096	2.12159e+07	0.0117647	0.0117647	Junction	FALSE	0.913749	-0.0339441
BARI_DM	3L	-	-	69.7252	2.18205e+07	0.0588235	0.0588235	Junction	FALSE	0.909387	0.049546
BARI_DM	3L	-	-	114.315	2.10421e+07	0.0235294	0.0235294	Junction	FALSE	0.969541	0.00871949
BARI_DM	3L	-	-	-73.9422	1.02564e+07	0.0235294	0.0235294	Junction	FALSE	0.748358	-0.143313
BARI_DM	3L	-	-	-11.7715	2.14909e+07	0.0352941	0.0470588	Junction	FALSE	0.508424	-0.183778
BARI_DM	3L	-	-	29.6258	1.5037e+07	0.0588235	0.0588235	Junction	FALSE	0.899494	-0.0753273
BARI_DM	3L	-	-	-44.0826	9.84877e+06	0.0117647	0.0117647	Junction	FALSE	0.909387	-0.0392872
BARI_DM	3L	-	-	-19.9635	1.65882e+07	0.0352941	0.0470588	Junction	FALSE	0.913749	0.034345
BARI_DM	3L	-	-	13.1833	1.63641e+07	0.0823529	0.0823529	Junction	FALSE	0.922153	0.0283539
BARI_DM	3L	-	-	43.1588	2.16374e+07	0.0352941	0.0352941	Junction	FALSE	0.625644	0.159049
BARI_DM	3L	-	-	82.9827	1.33218e+07	0.0117647	0.0117647	Junction	FALSE	0.899494	-0.0980608
BARI_DM	3L	-	-	119.818	1.17764e+07	0.0117647	0.0117647	Junction	FALSE	0.969541	-0.00722884
BARI_DM	3L	-	-	-163.387	7.27587e+06	0.0117647	0.0117647	Junction	FALSE	0.913749	-0.0339441
BARI_DM	3L	-	-	19.0644	6.52833e+06	0.0235294	0.0235294	Junction	FALSE	0.899494	-0.0824998
BARI_DM	3L	-	-	3.80353	1.90795e+07	0.0117647	0.0117647	Junction	FALSE	0.909387	0.0462017
BARI_DM	3L	-	-	-41.6845	1.63705e+07	0.0235294	0.0235294	Junction	FALSE	0.899494	-0.0863006
BARI_DM	3L	-	-	-25.2873	2.07419e+07	0.0117647	0.0117647	Junction	FALSE	0.909387	-0.0392872
BARI_DM	3L	-	-	22.5849	1.96039e+07	0.0117647	0.0117647	Junction	FALSE	0.899494	0.067574
BARI_DM	3L	-	-	36.6165	1.85866e+07	0.0235294	0.0235294	Junction	FALSE	0.909387	-0.059695
BARI_DM	3L	-	-	-154.162	1.46791e+07	0.0117647	0.0117647	Junction	FALSE	0.065311	0.334727
BARI_DM	3L	+	-	1754.12	1.01103e+07	0.0117647	0.0117647	Junction	FALSE	0.508424	-0.188893
BARI_DM	3L	+	-	1733.19	1.74836e+07	0.0117647	0.0117647	Junction	FALSE	0.508424	0.206493
BARI_DM	3L	+	-	348.871	1.83869e+07	0.0352941	0.0352941	Junction	FALSE	0.945756	-0.0189169
BARI_DM	3L	+	-	1679.05	2.58414e+06	0.0235294	0.0235294	Junction	FALSE	0.945756	-0.0178861
BARI_DM	3L	+	-	1753.82	1.87381e+07	0.0117647	0.0117647	Junction	FALSE	0.189861	0.27061
BARI_DM	3L	+	-	1662.77	1.72218e+07	0.0117647	0.0117647	Junction	FALSE	0.899494	-0.0927178
BARI_DM	3L	+	-	1797.15	1.76202e+07	0.0117647	0.0117647	Junction	FALSE	0.508424	-0.188893
BARI_DM	3L	+	-	1745.36	1.71081e+07	0.0352941	0.0352941	Junction	FALSE	0.899494	0.0809938
BARI_DM	3L	+	-	1763.44	1.8181e+07	0.0588235	0.0588235	Junction	FALSE	0.893506	-0.121849
BARI_DM	3L	+	-	1766.84	1.82284e+07	0.0235294	0.0235294	Junction	FALSE	0.859595	-0.128109
BARI_DM	3L	+	-	1698.69	7.88446e+06	0.0352941	0.0352941	Junction	FALSE	0.945756	-0.0189169
BARI_DM	3L	+	-	1750.1	1.32352e+07	0.0588235	0.0705882	Junction	FALSE	0.993501	0.00170266
BARI_DM	3L	+	-	1766.45	3.8057e+06	0.0117647	0.0117647	Junction	FALSE	0.899494	-0.0660025
BARI_DM	3L	+	-	1745.07	2.0472e+07	0.0117647	0.0117647	Junction	FALSE	0.96019	-0.0125719
BARI_DM	3L	+	-	1853.64	1.83869e+07	0.0117647	0.0117647	Junction	FALSE	0.913749	-0.0339441
BARI_DM	3L	+	-	1769.25	1.90405e+07	0.0235294	0.0235294	Junction	FALSE	0.940353	0.0239227
BARI_DM	3L	+	-	1734.68	1.69305e+06	0.0117647	0.0117647	Junction	FALSE	0.189861	0.27061
BARI_DM	3L	+	-	1763.81	2.17639e+07	0.0823529	0.0823529	Junction	FALSE	0.920596	-0.0303263
BARI_DM	3L	+	-	1657.95	1.22623e+07	0.0117647	0.0117647	Junction	FALSE	0.899494	-0.0873747
BARI_DM	3L	+	-	1712.29	1.82163e+07	0.0117647	0.0117647	Junction	FALSE	0.909387	-0.0392872
BARI_DM	3L	+	-	1870.9	1.49989e+07	0.0117647	0.0117647	Junction	FALSE	0.899494	0.0889462
BARI_DM	3L	+	-	1785.84	1.93161e+07	0.0352941	0.0352941	Junction	FALSE	0.762284	-0.140683
BARI_DM	3L	+	-	1717.82	2.12159e+07	0.0117647	0.0117647	Junction	FALSE	0.913749	-0.0339441
BARI_DM	3L	+	-	1791.23	1.07364e+07	0.0117647	0.0117647	Junction	FALSE	0.909387	-0.0392872
BARI_DM	3L	+	-	1752.98	2.80569e+07	0.0117647	0.0117647	Junction	FALSE	0.940353	-0.023258
BARI_DM	3L	+	-	1775.34	1.33555e+06	0.0117647	0.0117647	Junction	FALSE	0.969541	-0.00722884
BARI_DM	3L	+	+	1721.1	1.85866e+07	0.0352941	0.0352941	Junction	FALSE	0.993501	0.00293855
BARI_DM	3L	+	+	1778.55	1.33218e+07	0.0117647	0.0117647	Junction	FALSE	0.899494	-0.0980608
BARI_DM	3L	+	+	1683.82	1.63641e+07	0.0705882	0.0705882	Junction	FALSE	0.909387	0.0627148
BARI_DM	3L	+	+	1680.26	2.1491e+07	0.0352941	0.0352941	Junction	FALSE	0.697052	-0.15005
BARI_DM	3L	+	+	1752.54	2.18205e+07	0.0588235	0.0588235	Junction	FALSE	0.909387	0.049546
BARI_DM	3L	+	+	1689.98	6.5284e+06	0.0235294	0.0235294	Junction	FALSE	0.899494	-0.0824998
BARI_DM	3L	+	+	1719.18	5.16645e+06	0.0117647	0.0117647	Junction	FALSE	0.189861	0.27061
BARI_DM	3L	+	+	1754.94	1.5037e+07	0.0470588	0.0470588	Junction	FALSE	0.899494	-0.0718546
BARI_DM	3L	+	+	1710.6	7.27572e+06	0.0117647	0.0117647	Junction	FALSE	0.913749	-0.0339441
BARI_DM	3L	+	+	1798.49	2.07418e+07	0.0117647	0.0117647	Junction	FALSE	0.909387	-0.0392872
BARI_DM	3L	+	+	1760.93	2.16374e+07	0.0588235	0.0588235	Junction	FALSE	0.697052	0.149934
BARI_DM	3L	+	+	1746.58	1.25957e+07	0.0117647	0.0117647	Junction	FALSE	0.993501	-0.00188578
BARI_DM	3L	+	+	1689.42	1.9604e+07	0.0117647	0.0117647	Junction	FALSE	0.899494	0.067574
BARI_DM	3L	+	+	1752.86	1.65881e+07	0.0352941	0.0352941	Junction	FALSE	0.969541	0.00918297
BARI_DM	3L	+	+	1749.88	8.92352e+06	0.0117647	0.0117647	Junction	FALSE	0.899494	-0.0820316
BARI_DM	3L	+	+	1786.65	9.84866e+06	0.0117647	0.0117647	Junction	FALSE	0.909387	-0.0392872
BARI_DM	3L	+	+	1721.9	2.10423e+07	0.0235294	0.0235294	Junction	FALSE	0.969541	0.00871949
BARI_DM	3L	+	+	1809.29	1.02563e+07	0.0235294	0.0235294	Junction	FALSE	0.748358	-0.143313
BARI_DM	3L	+	+	1737.21	1.90795e+07	0.0117647	0.0117647	Junction	FALSE	0.909387	0.0462017
BARI_DM	3L	+	+	1712.68	1.63705e+07	0.0235294	0.0235294	Junction	FALSE	0.899494	-0.0863006
BARI_DM	3L	+	+	1747.52	4.11801e+06	0.0235294	0.0352941	Junction	FALSE	0.508424	-0.189816
BARI_DM	BLOOD_LTR	-	+	-30.3714	484.482	0.0117647	0.0117647	Junction	FALSE	0.945756	-0.017915
BARI_DM	BLOOD_LTR	-	+	1482.57	274.427	0.0117647	0.0117647	Junction	FALSE	0.945756	-0.017915
BARI_DM	DNAREP1_DM	+	+	1723.74	343.046	0.0352941	0.0352941	Junction	FALSE	0.8751	0.124705
BARI_DM	DM1731_LTR	-	+	1442.16	268.84	0.0235294	0.0235294	Junction	FALSE	0.899494	-0.0824998
BARI_DM	DM1731_LTR	+	-	1443.09	-51.9065	0.0588235	0.0588235	Junction	FALSE	0.899494	-0.116952
BARI_DM	COPIA_LTR_DM	-	-	420.506	-51.8988	0.0705882	0.0705882	Junction	FALSE	0.945756	-0.0182587
BARI_DM	COPIA_LTR_DM	+	+	338.084	323.007	0.0705882	0.0705882	Junction	FALSE	0.945756	-0.0182587
BARI_DM	Agoriino_I	-	+	42.2581	4912.24	0.0235294	0.0235294	Junction	FALSE	0.899494	-0.0672966
BARI_DM	Agoriino_I	+	-	1709.58	6399.43	0.0235294	0.0235294	Junction	FALSE	0.899494	-0.0672966
BARI_DM	BLASTOPIA_LTR	-	-	1420.03	-23.4017	0.0117647	0.0117647	Junction	FALSE	0.899494	-0.0660025
BARI_DM	BLASTOPIA_LTR	-	-	-152.366	-169.366	0.0117647	0.0117647	Junction	FALSE	0.899494	-0.0660025
BARI_DM	DM412_LTR	-	-	106.448	139.048	0.0117647	0.0117647	Junction	FALSE	0.899494	-0.0873747
BARI_DM	DM412_LTR	-	-	728.266	-12.675	0.0117647	0.0117647	Junction	FALSE	0.189861	0.27061
BARI_DM	DM412_LTR	+	+	1650.95	328.202	0.0117647	0.0117647	Junction	FALSE	0.899494	-0.0873747
BARI_DM	DM412_LTR	+	+	727.3	491.238	0.0117647	0.0117647	Junction	FALSE	0.189861	0.27061
BARI_DM	QUASIMODO_LTR	-	-	61.3545	-57.5823	0.0352941	0.0352941	Junction	FALSE	0.899494	-0.0813611
BARI_DM	TABOR_LTR	-	-	-119.735	-123.485	0.0235294	0.0235294	Junction	FALSE	0.909387	-0.059695
BARI_DM	TABOR_LTR	-	-	481.177	-17.8225	0.0117647	0.0117647	Junction	FALSE	0.909387	-0.0446302
BARI_DM	TABOR_LTR	-	-	1412.18	54.9622	0.0235294	0.0235294	Junction	FALSE	0.909387	-0.059695
BARI_DM	TABOR_LTR	+	+	451.723	532.473	0.0117647	0.0117647	Junction	FALSE	0.909387	-0.0446302
BARI_DM	TABOR_LTR	+	+	1460.62	526.699	0.0235294	0.0235294	Junction	FALSE	0.909387	-0.059695
BARI_DM	MICROPIA_LTR	-	-	259.102	43.5576	0.0705882	0.0823529	Junction	FALSE	0.899494	0.0906434
BARI_DM	MICROPIA_LTR	+	+	1872.14	641.433	0.0470588	0.0470588	Junction	FALSE	0.909387	0.0532908
BARI_DM	MICROPIA_LTR	+	+	345.329	459.204	0.0705882	0.0705882	Junction	FALSE	0.909387	0.0492192
BARI_DM	MICROPIA_LTR	+	+	1681.92	525.706	0.0117647	0.0117647	Junction	FALSE	0.909387	0.0408587
BARI_DM	FW	-	+	300.434	4692.77	0.0117647	0.0117647	Junction	FALSE	0.899494	-0.0713455
BARI_DM	FW	-	+	1448.48	4623.12	0.0117647	0.0117647	Junction	FALSE	0.899494	0.104975
BARI_DM	FW	-	+	963.488	4688.06	0.0705882	0.0823529	Junction	FALSE	0.899494	-0.0704047
BARI_DM	FW	-	+	-50.2121	4713.55	0.0117647	0.0117647	Junction	FALSE	0.940353	-0.023258
BARI_DM	FW	-	-	-131.738	496.637	0.0117647	0.0117647	Junction	FALSE	0.909387	0.0462017
BARI_DM	FW	-	-	1292.75	2638.38	0.0117647	0.0117647	Junction	FALSE	0.52294	0.174435
BARI_DM	FW	-	-	1405.92	742.638	0.0823529	0.0823529	Junction	FALSE	0.806008	-0.133017
BARI_DM	FW	-	-	-138.267	586.133	0.0117647	0.0117647	Junction	FALSE	0.899494	-0.0766886
BARI_DM	FW	-	-	96.0204	65.5918	0.0117647	0.0117647	Junction	FALSE	0.52294	0.174435
BARI_DM	FW	-	-	116.758	2287.88	0.0117647	0.0117647	Junction	FALSE	0.899494	-0.0766886
BARI_DM	FW	-	-	1302.05	-5.44904	0.0117647	0.0117647	Junction	FALSE	0.913749	-0.0339441
BARI_DM	FW	-	-	1245.92	1080.25	0.0117647	0.0117647	Junction	FALSE	0.899494	-0.103404
BARI_DM	FW	+	-	1893.77	-163.266	0.0117647	0.0117647	Junction	FALSE	0.899494	-0.0713455
BARI_DM	FW	+	-	1028.71	1282.36	0.0352941	0.0352941	Junction	FALSE	0.913749	0.0341606
BARI_DM	FW	+	-	1483.92	21.0809	0.0117647	0.0117647	Junction	FALSE	0.899494	0.104975
BARI_DM	FW	+	-	1635.45	-48.7359	0.0117647	0.0117647	Junction	FALSE	0.940353	-0.023258
BARI_DM	FW	+	-	896.516	-17.7661	0.0117647	0.0117647	Junction	FALSE	0.899494	-0.0713455
BARI_DM	FW	+	-	422.099	61.9005	0.0117647	0.0117647	Junction	FALSE	0.899494	-0.0713455
BARI_DM	FW	+	-	1011.04	3670.74	0.0117647	0.0117647	Junction	FALSE	0.899494	-0.0766886
BARI_DM	FW	+	+	1468.52	4677.8	0.0823529	0.0941176	Junction	FALSE	0.52294	-0.174362
BARI_DM	FW	+	+	296.884	4589.99	0.0235294	0.0235294	Junction	FALSE	0.899494	0.0695323
BARI_DM	FW	+	+	1764.85	4838.47	0.0235294	0.0235294	Junction	FALSE	0.899494	0.0695323
BARI_DM	FW	+	+	1522.06	4712.02	0.0235294	0.0235294	Junction	FALSE	0.915841	-0.0330893
BARI_DM	FW	+	+	1328.26	4682.4	0.0470588	0.0470588	Junction	FALSE	0.909387	0.0478497
BARI_DM	DOC	-	+	753.64	4696.17	0.0705882	0.0705882	Junction	FALSE	0.463196	0.226911
BARI_DM	DOC	-	+	1357.9	4657.27	0.0352941	0.0352941	Junction	FALSE	0.96019	-0.0126725
BARI_DM	DOC	-	+	-123.585	4875.92	0.0235294	0.0235294	Junction	FALSE	0.954499	0.0163211
BARI_DM	DOC	-	+	430.348	4724.49	0.0352941	0.0352941	Junction	FALSE	0.508424	0.20276
BARI_DM	DOC	-	-	-89.9507	136.716	0.0117647	0.0117647	Junction	FALSE	0.899494	0.0782601
BARI_DM	DOC	-	-	-151.464	767.036	0.0117647	0.0117647	Junction	FALSE	0.909387	-0.0446302
BARI_DM	DOC	-	-	629.208	15.3955	0.0235294	0.0235294	Junction	FALSE	0.508424	0.19876
BARI_DM	DOC	-	-	849.191	30.2141	0.0235294	0.0235294	Junction	FALSE	0.748358	-0.143313
BARI_DM	DOC	-	-	1407.13	1784.33	0.0117647	0.0117647	Junction	FALSE	0.909387	-0.0499733
BARI_DM	DOC	-	-	1214.22	18.8159	0.0117647	0.0117647	Junction	FALSE	0.899494	0.0782601
BARI_DM	DOC	-	-	204.883	-71.6629	0.0117647	0.0117647	Junction	FALSE	0.899494	0.0782601
BARI_DM	DOC	-	-	1453.79	888.286	0.0117647	0.0117647	Junction	FALSE	0.909387	-0.0446302
BARI_DM	DOC	+	-	790.763	1720.31	0.0823529	0.0823529	Junction	FALSE	0.202755	0.267266
BARI_DM	DOC	+	-	1437.38	1408.69	0.0823529	0.0941176	Junction	FALSE	0.93618	-0.0258923
BARI_DM	DOC	+	-	443	3.74969	0.0235294	0.0235294	Junction	FALSE	0.508424	0.19876
BARI_DM	DOC	+	-	515.021	2374.16	0.0117647	0.0235294	Junction	FALSE	0.899494	0.067574
BARI_DM	DOC	+	-	1813.62	-13.9516	0.0117647	0.0117647	Junction	FALSE	0.899494	-0.0873747
BARI_DM	DOC	+	-	1505.26	52.0776	0.0117647	0.0117647	Junction	FALSE	0.909387	-0.0446302
BARI_DM	DOC	+	+	1468.57	4730.27	0.0352941	0.0352941	Junction	FALSE	0.922153	-0.0282835
BARI_DM	DOC	+	+	1607.55	4858.55	0.0117647	0.0117647	Junction	FALSE	0.899494	0.0782601
BARI_DM	DOC	+	+	838.217	4770.15	0.0117647	0.0117647	Junction	FALSE	0.899494	-0.0980608
BARI_DM	DOC	+	+	627.306	4771.42	0.0235294	0.0235294	Junction	FALSE	0.508424	0.19876
BARI_DM	DOC	+	+	339.031	2743.34	0.0117647	0.0117647	Junction	FALSE	0.899494	0.067574
BARI_DM	DOC	+	+	1883.52	4573.12	0.0117647	0.0117647	Junction	FALSE	0.899494	0.0782601
BARI_DM	DOC	+	+	1377.12	4601.78	0.0117647	0.0117647	Junction	FALSE	0.899494	0.0782601
BARI_DM	DOC	+	+	1043.75	4556.08	0.0117647	0.0117647	Junction	FALSE	0.899494	-0.103404
BARI_DM	S_DM	-	+	-67.6832	1835.82	0.0470588	0.0470588	Junction	FALSE	0.909387	-0.0582518
BARI_DM	S_DM	-	+	544.379	1824.62	0.0117647	0.0117647	Junction	FALSE	0.899494	-0.103404
BARI_DM	S_DM	-	+	752.911	1788.42	0.0117647	0.0117647	Junction	FALSE	0.909387	-0.0446302
BARI_DM	S_DM	-	-	908.411	-167.589	0.0117647	0.0117647	Junction	FALSE	0.909387	-0.0446302
BARI_DM	S_DM	-	-	-29.5114	-122.562	0.0352941	0.0352941	Junction	FALSE	0.922153	-0.0282835
BARI_DM	S_DM	-	-	583.879	-128.121	0.0117647	0.0117647	Junction	FALSE	0.899494	-0.103404
BARI_DM	S_DM	+	-	417.621	-83.1206	0.0117647	0.0117647	Junction	FALSE	0.899494	-0.103404
BARI_DM	S_DM	+	-	606.189	-128.789	0.0117647	0.0117647	Junction	FALSE	0.909387	-0.0446302
BARI_DM	S_DM	+	+	1810.65	1465.73	0.0352941	0.0352941	Junction	FALSE	0.899494	-0.0813611
BARI_DM	S_DM	+	+	498.787	1725.45	0.0117647	0.0117647	Junction	FALSE	0.899494	-0.103404
BARI_DM	DIVER2_I	+	+	1290.22	460.216	0.188235	0.2	Junction	FALSE	0.189861	0.279718
BARI_DM	GYPSY_LTR	-	+	567.322	562.325	0.0823529	0.0823529	Junction	FALSE	0.899494	0.0786511
BARI_DM	GYPSY_LTR	-	+	92.8106	343.085	0.0470588	0.0470588	Junction	FALSE	0.909387	0.0560114
BARI_DM	GYPSY_LTR	+	-	1849.53	-99.8396	0.0470588	0.0470588	Junction	FALSE	0.899494	0.0750552
BARI_DM	GYPSY_LTR	+	-	316.174	93.7624	0.0823529	0.0823529	Junction	FALSE	0.945756	0.0178753
BARI_DM	DIVER2_LTR	-	+	52.2262	320.649	0.0235294	0.0235294	Junction	FALSE	0.993501	0.00111788
BARI_DM	POGO	-	+	-50.2614	244.261	0.0117647	0.0117647	Junction	FALSE	0.913749	0.0355156
BARI_DM	POGO	-	+	448.048	2102.01	0.0117647	0.0117647	Junction	FALSE	0.899494	-0.0873747
BARI_DM	POGO	+	+	1365.17	241.165	0.0117647	0.0117647	Junction	FALSE	0.899494	0.067574
BARI_DM	POGO	+	+	1259.42	2278.13	0.0117647	0.0117647	Junction	FALSE	0.899494	0.067574
BARI_DM	Jockey	+	+	1474.73	5052.83	0.0117647	0.0117647	Junction	FALSE	0.945756	-0.017915
BARI_DM	Jockey	+	+	1884.15	5153.9	0.0117647	0.0117647	Junction	FALSE	0.920596	0.0301726
BARI_DM	STALKER3_LTR	-	-	40.9568	-26.8428	0.0470588	0.0470588	Junction	FALSE	0.868733	-0.126266
BARI_DM	TRANSPAC_LTR	-	-	1345.05	35.0484	0.0117647	0.0117647	Junction	FALSE	0.899494	-0.0873747
BARI_DM	TRANSPAC_LTR	-	-	-156.241	-162.824	0.0235294	0.0235294	Junction	FALSE	0.922153	-0.0292885
BARI_DM	DOC5_DM	-	+	65.9001	1029.82	0.0235294	0.0352941	Junction	FALSE	0.920596	0.0310711
BARI_DM	DOC5_DM	+	-	1744.93	994.192	0.0235294	0.0352941	Junction	FALSE	0.920596	0.0310711
BARI_DM	emb_X15366_DMSAT07_Drosophila	-	-	64.8231	-148.927	0.0117647	0.0117647	Junction	FALSE	0.945756	-0.017915
BARI_DM	emb_X15366_DMSAT07_Drosophila	-	-	-112.26	-145.26	0.0117647	0.0117647	Junction	FALSE	0.945756	-0.017915
BARI_DM	emb_X15366_DMSAT07_Drosophila	+	+	1660.68	254.677	0.0117647	0.0117647	Junction	FALSE	0.945756	-0.017915
BARI_DM	emb_X15366_DMSAT07_Drosophila	+	+	1854.93	258.427	0.0117647	0.0117647	Junction	FALSE	0.945756	-0.017915
BARI_DM	DOC2_DM	-	-	-0.786059	502.532	0.188235	0.211765	Junction	FALSE	0.138261	0.300958
BARI_DM	MDG1_LTR	-	+	944.161	398.117	0.0352941	0.0352941	Junction	FALSE	0.065311	0.333893
BARI_DM	MDG1_LTR	-	-	1305.82	-106.455	0.0823529	0.0823529	Junction	FALSE	0.827942	-0.130921
BARI_DM	MDG1_LTR	-	-	307.688	69.6882	0.0117647	0.0117647	Junction	FALSE	0.525776	-0.172864
BARI_DM	MDG1_LTR	+	+	906.223	546.223	0.0117647	0.0117647	Junction	FALSE	0.909387	-0.0446302
BARI_DM	MDG1_LTR	+	+	1218.4	431.327	0.211765	0.223529	Junction	FALSE	0.508424	-0.213739
BARI_DM	MDG1_LTR	+	+	366.455	465.74	0.0117647	0.0117647	Junction	FALSE	0.525776	-0.172864
BARI_DM	HELENA_RT	-	+	34.5577	336.526	0.0352941	0.0352941	Junction	FALSE	0.792806	-0.134439
BARI_DM	HELENA_RT	+	-	1610.25	280.618	0.0352941	0.0352941	Junction	FALSE	0.792806	-0.134439
BARI_DM	HELENA_RT	+	-	1884.53	715.219	0.0235294	0.0235294	Junction	FALSE	0.52294	-0.17752
