# Supplementary figures and images for: Double insertion of transposable elements provides a substrate for the evolution of satellite DNA
Source: PubMed Central journal article supplement — Genome Res. 2018 May;28(5):714–25. doi: 10.1101/gr.231472.117 (PMC5932611; doi:10.1101/gr.231472.117), 2018-05

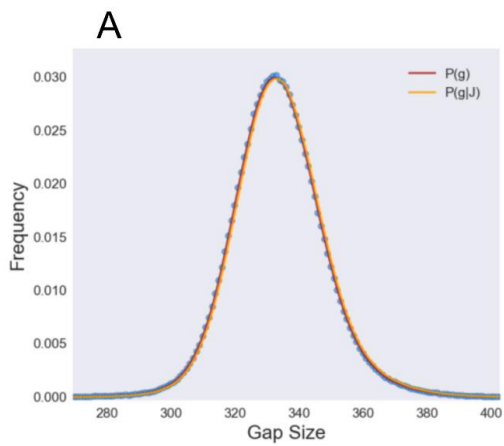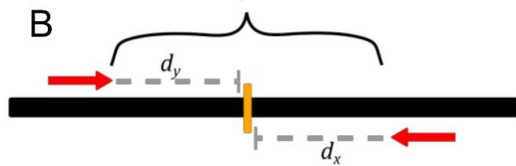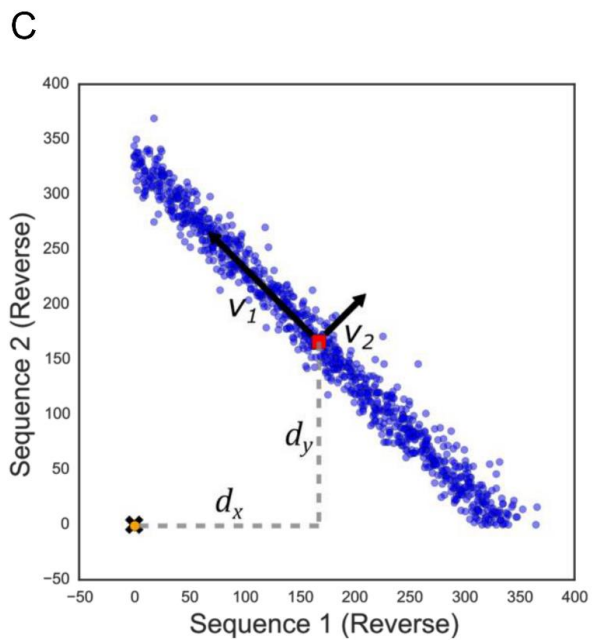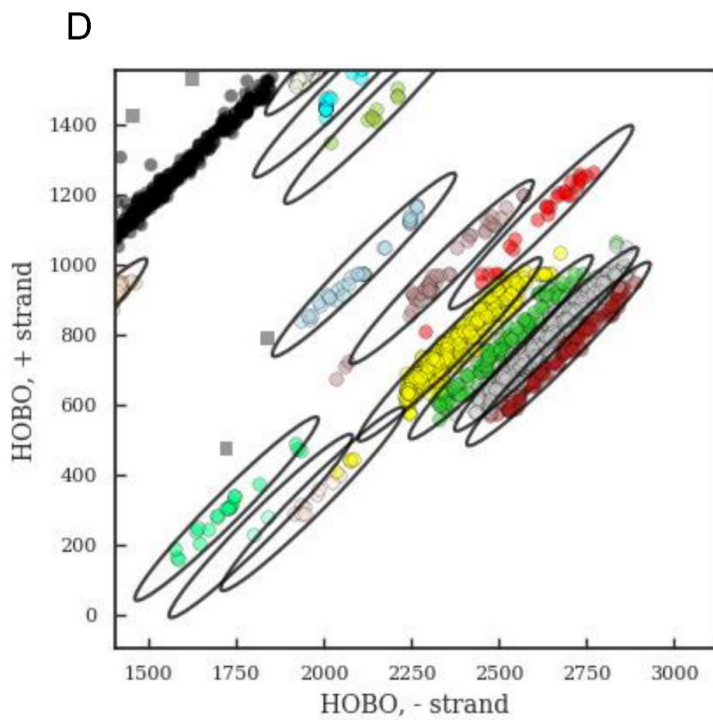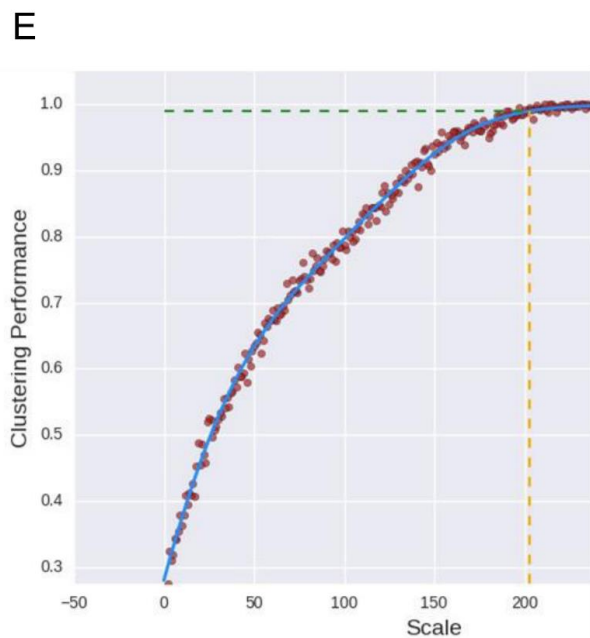

Supplement: supp_gr.231472.117_Supplemental_Fig_S1.pdf [file supp_gr.231472.117_Supplemental_Fig_S1.pdf]

**A**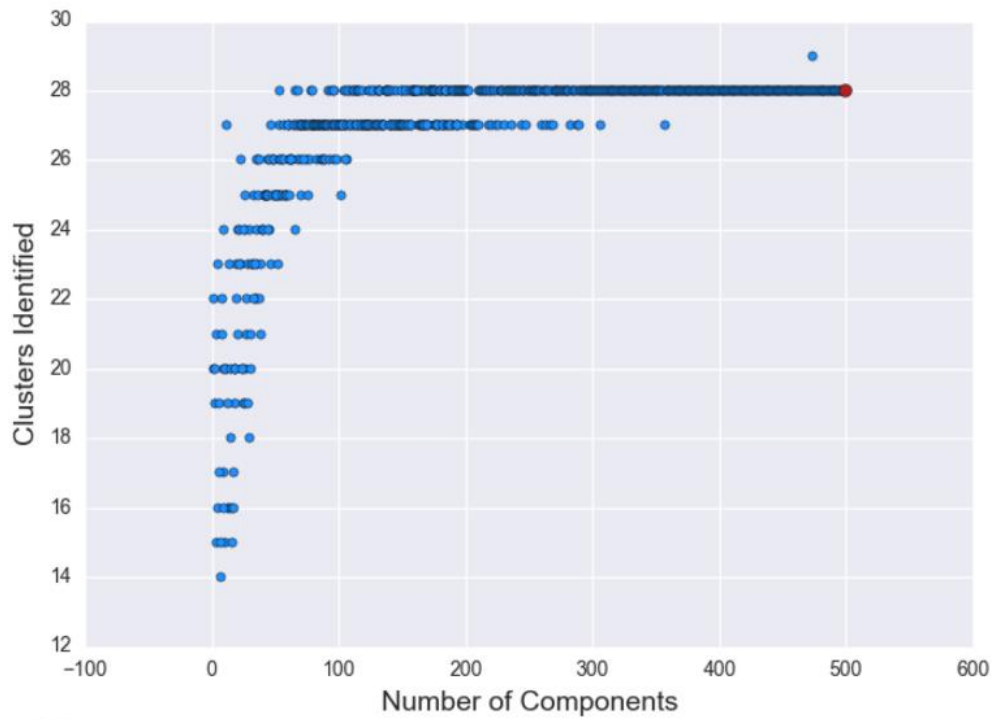**B**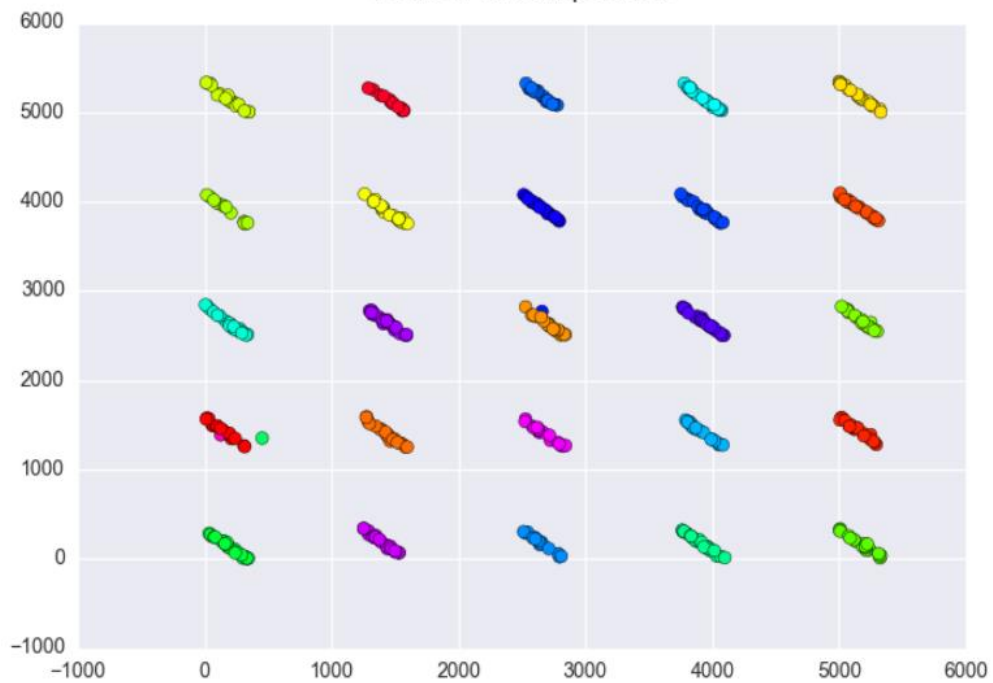

Supplement: supp_gr.231472.117_Supplemental_Fig_S2.pdf [file supp_gr.231472.117_Supplemental_Fig_S2.pdf]

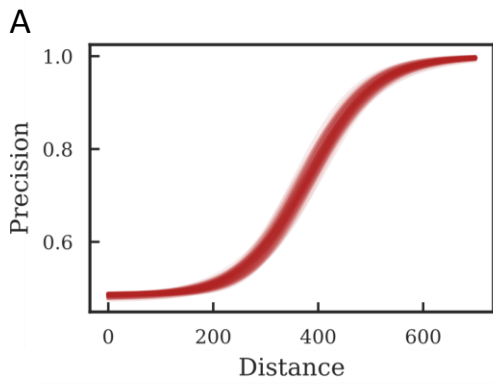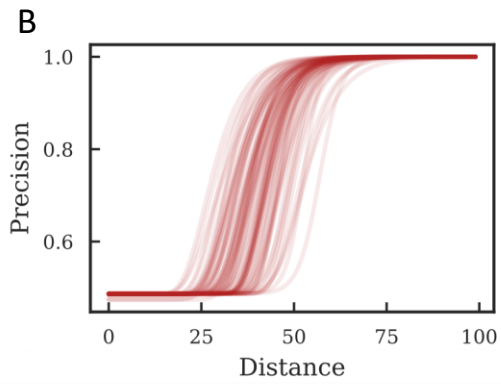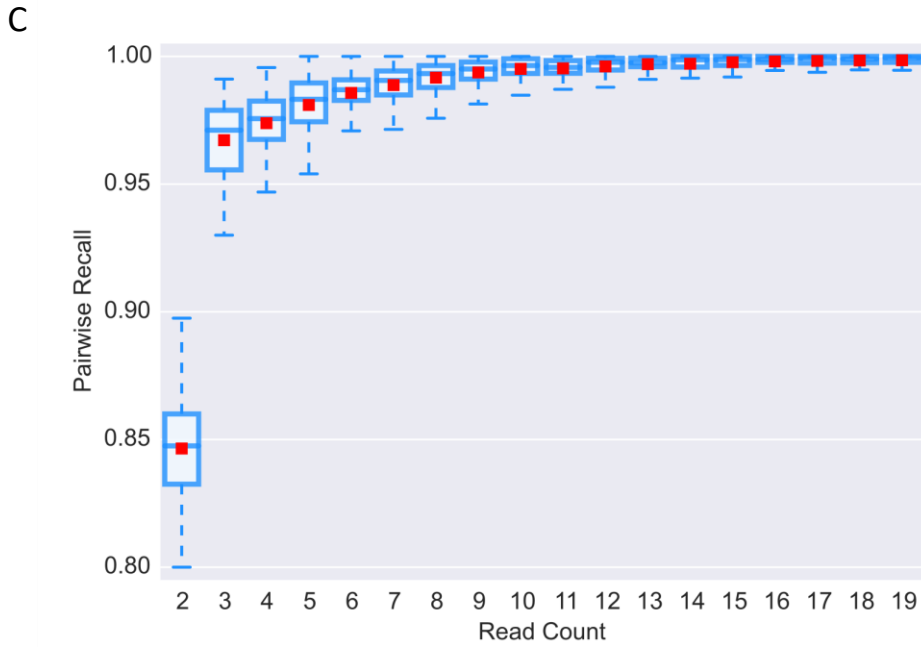

Supplement: supp_gr.231472.117_Supplemental_Fig_S3.pdf [file supp_gr.231472.117_Supplemental_Fig_S3.pdf]

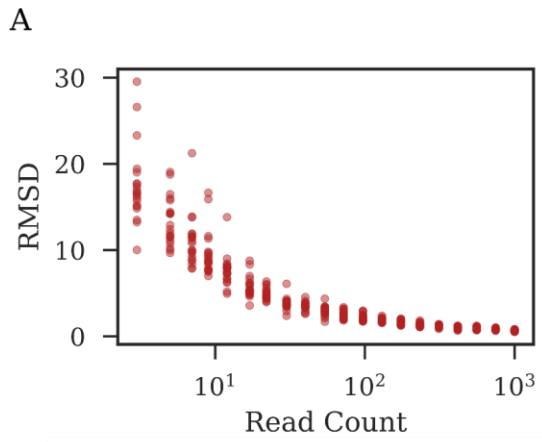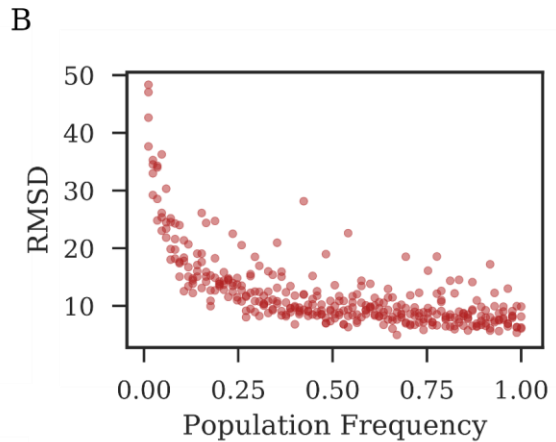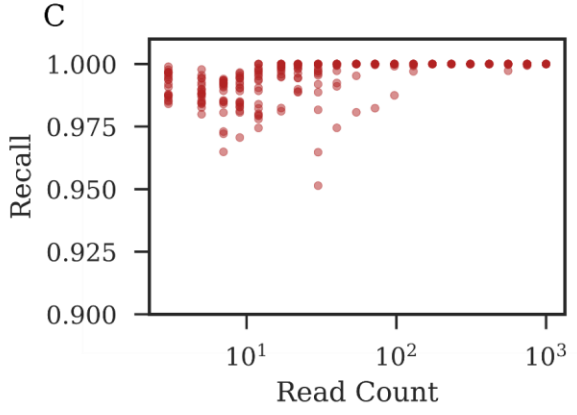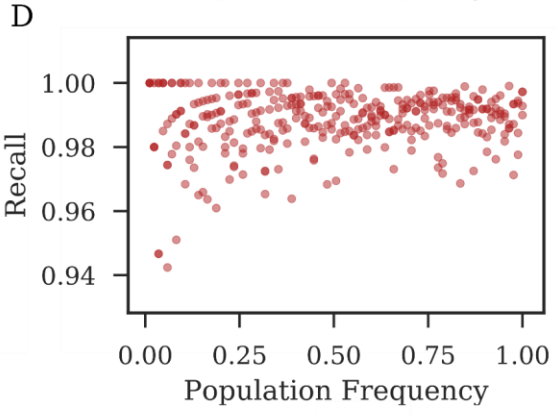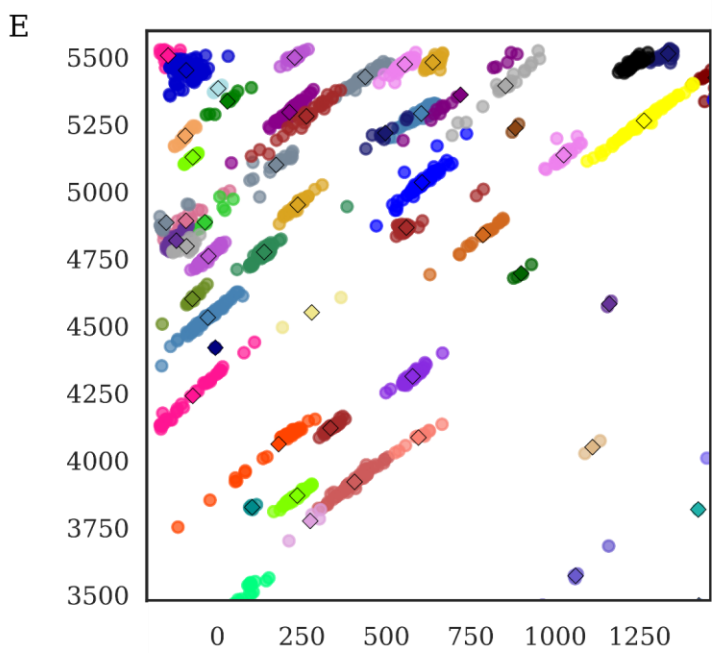

Supplement: supp_gr.231472.117_Supplemental_Fig_S4.pdf [file supp_gr.231472.117_Supplemental_Fig_S4.pdf]

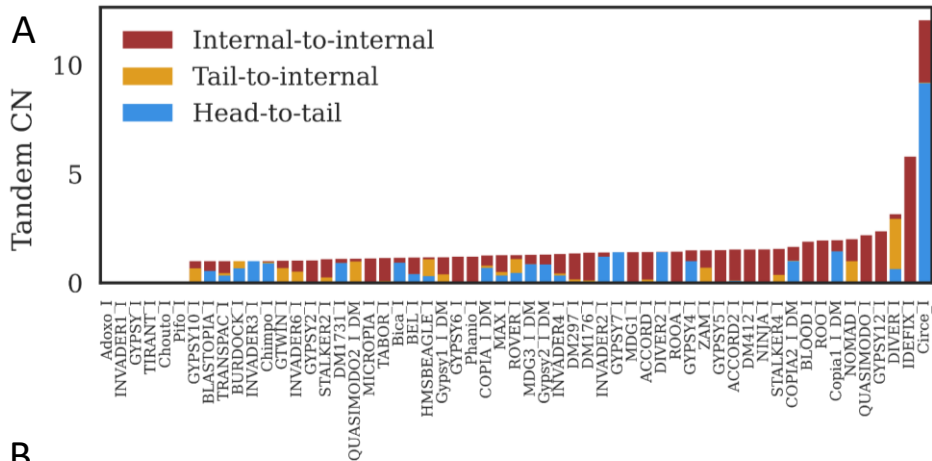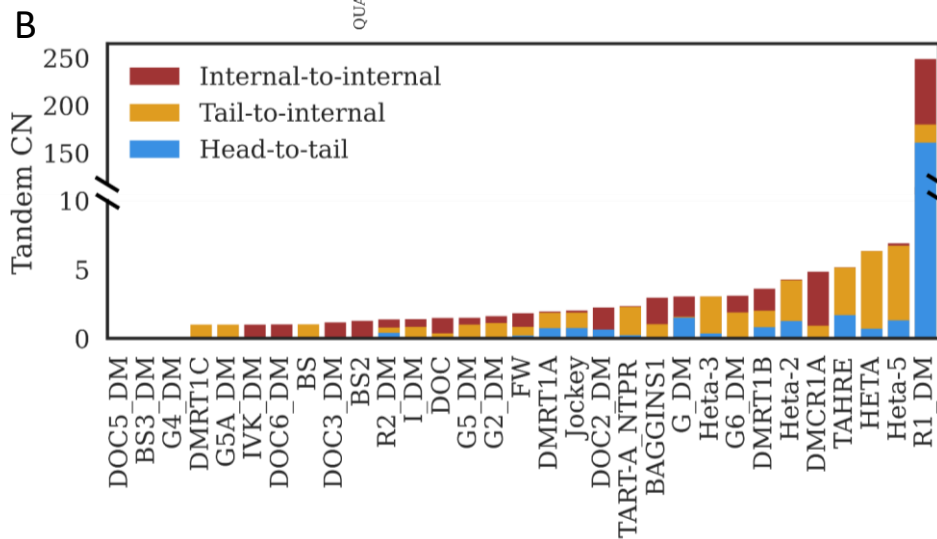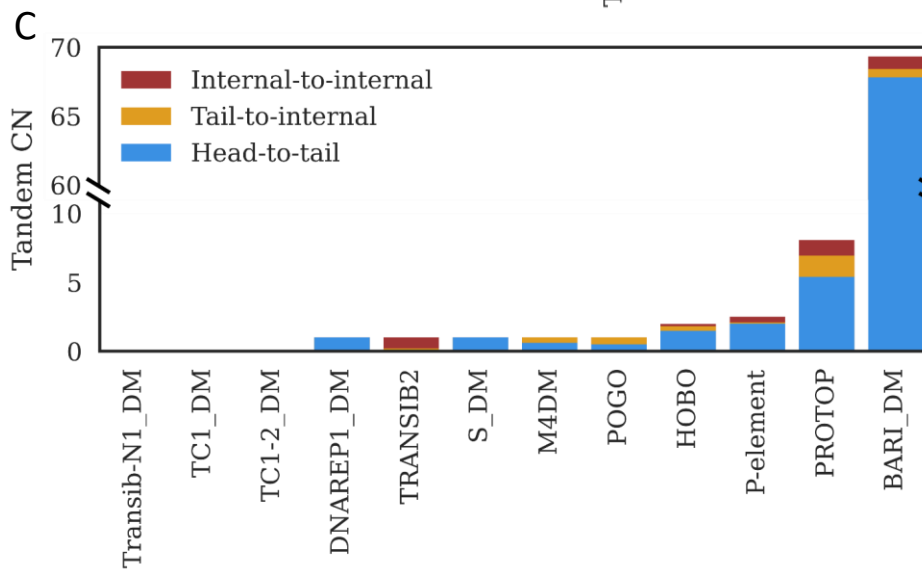

Supplement: supp_gr.231472.117_Supplemental_Fig_S5.pdf [file supp_gr.231472.117_Supplemental_Fig_S5.pdf]

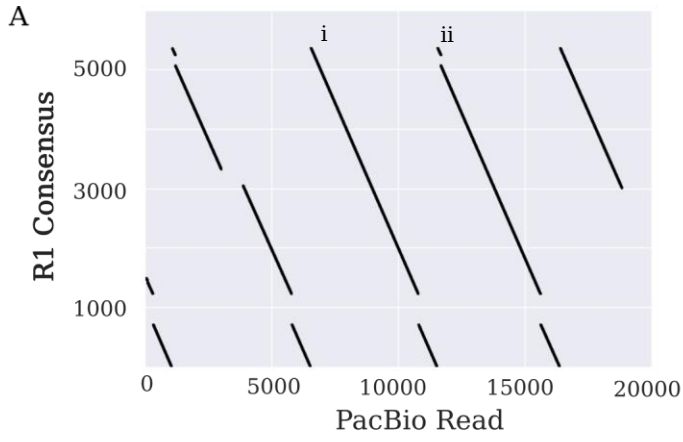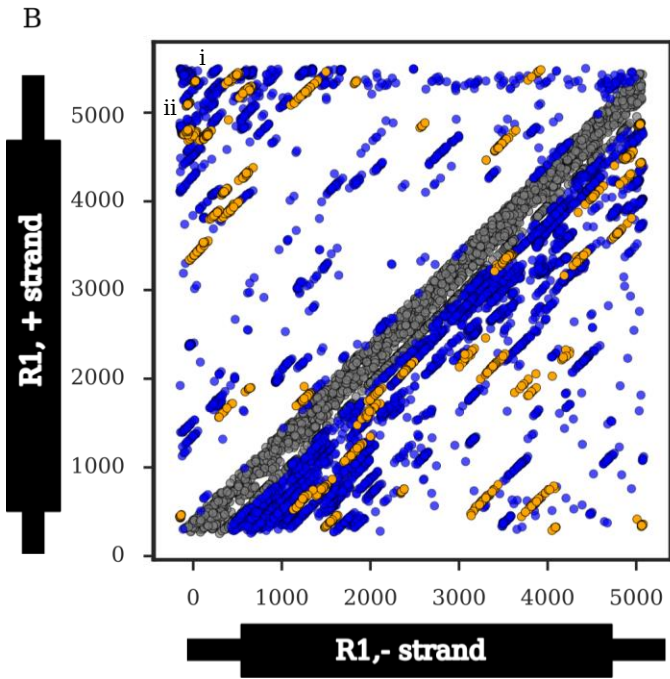

Supplement: supp_gr.231472.117_Supplemental_Fig_S7.pdf [file supp_gr.231472.117_Supplemental_Fig_S7.pdf]
